# Supplementary material
Source: PubMed Central journal article supplement (PMC6004251)
Supplement: NIHMS962475-supplement-2.pdf [file NIHMS962475-supplement-2.pdf]

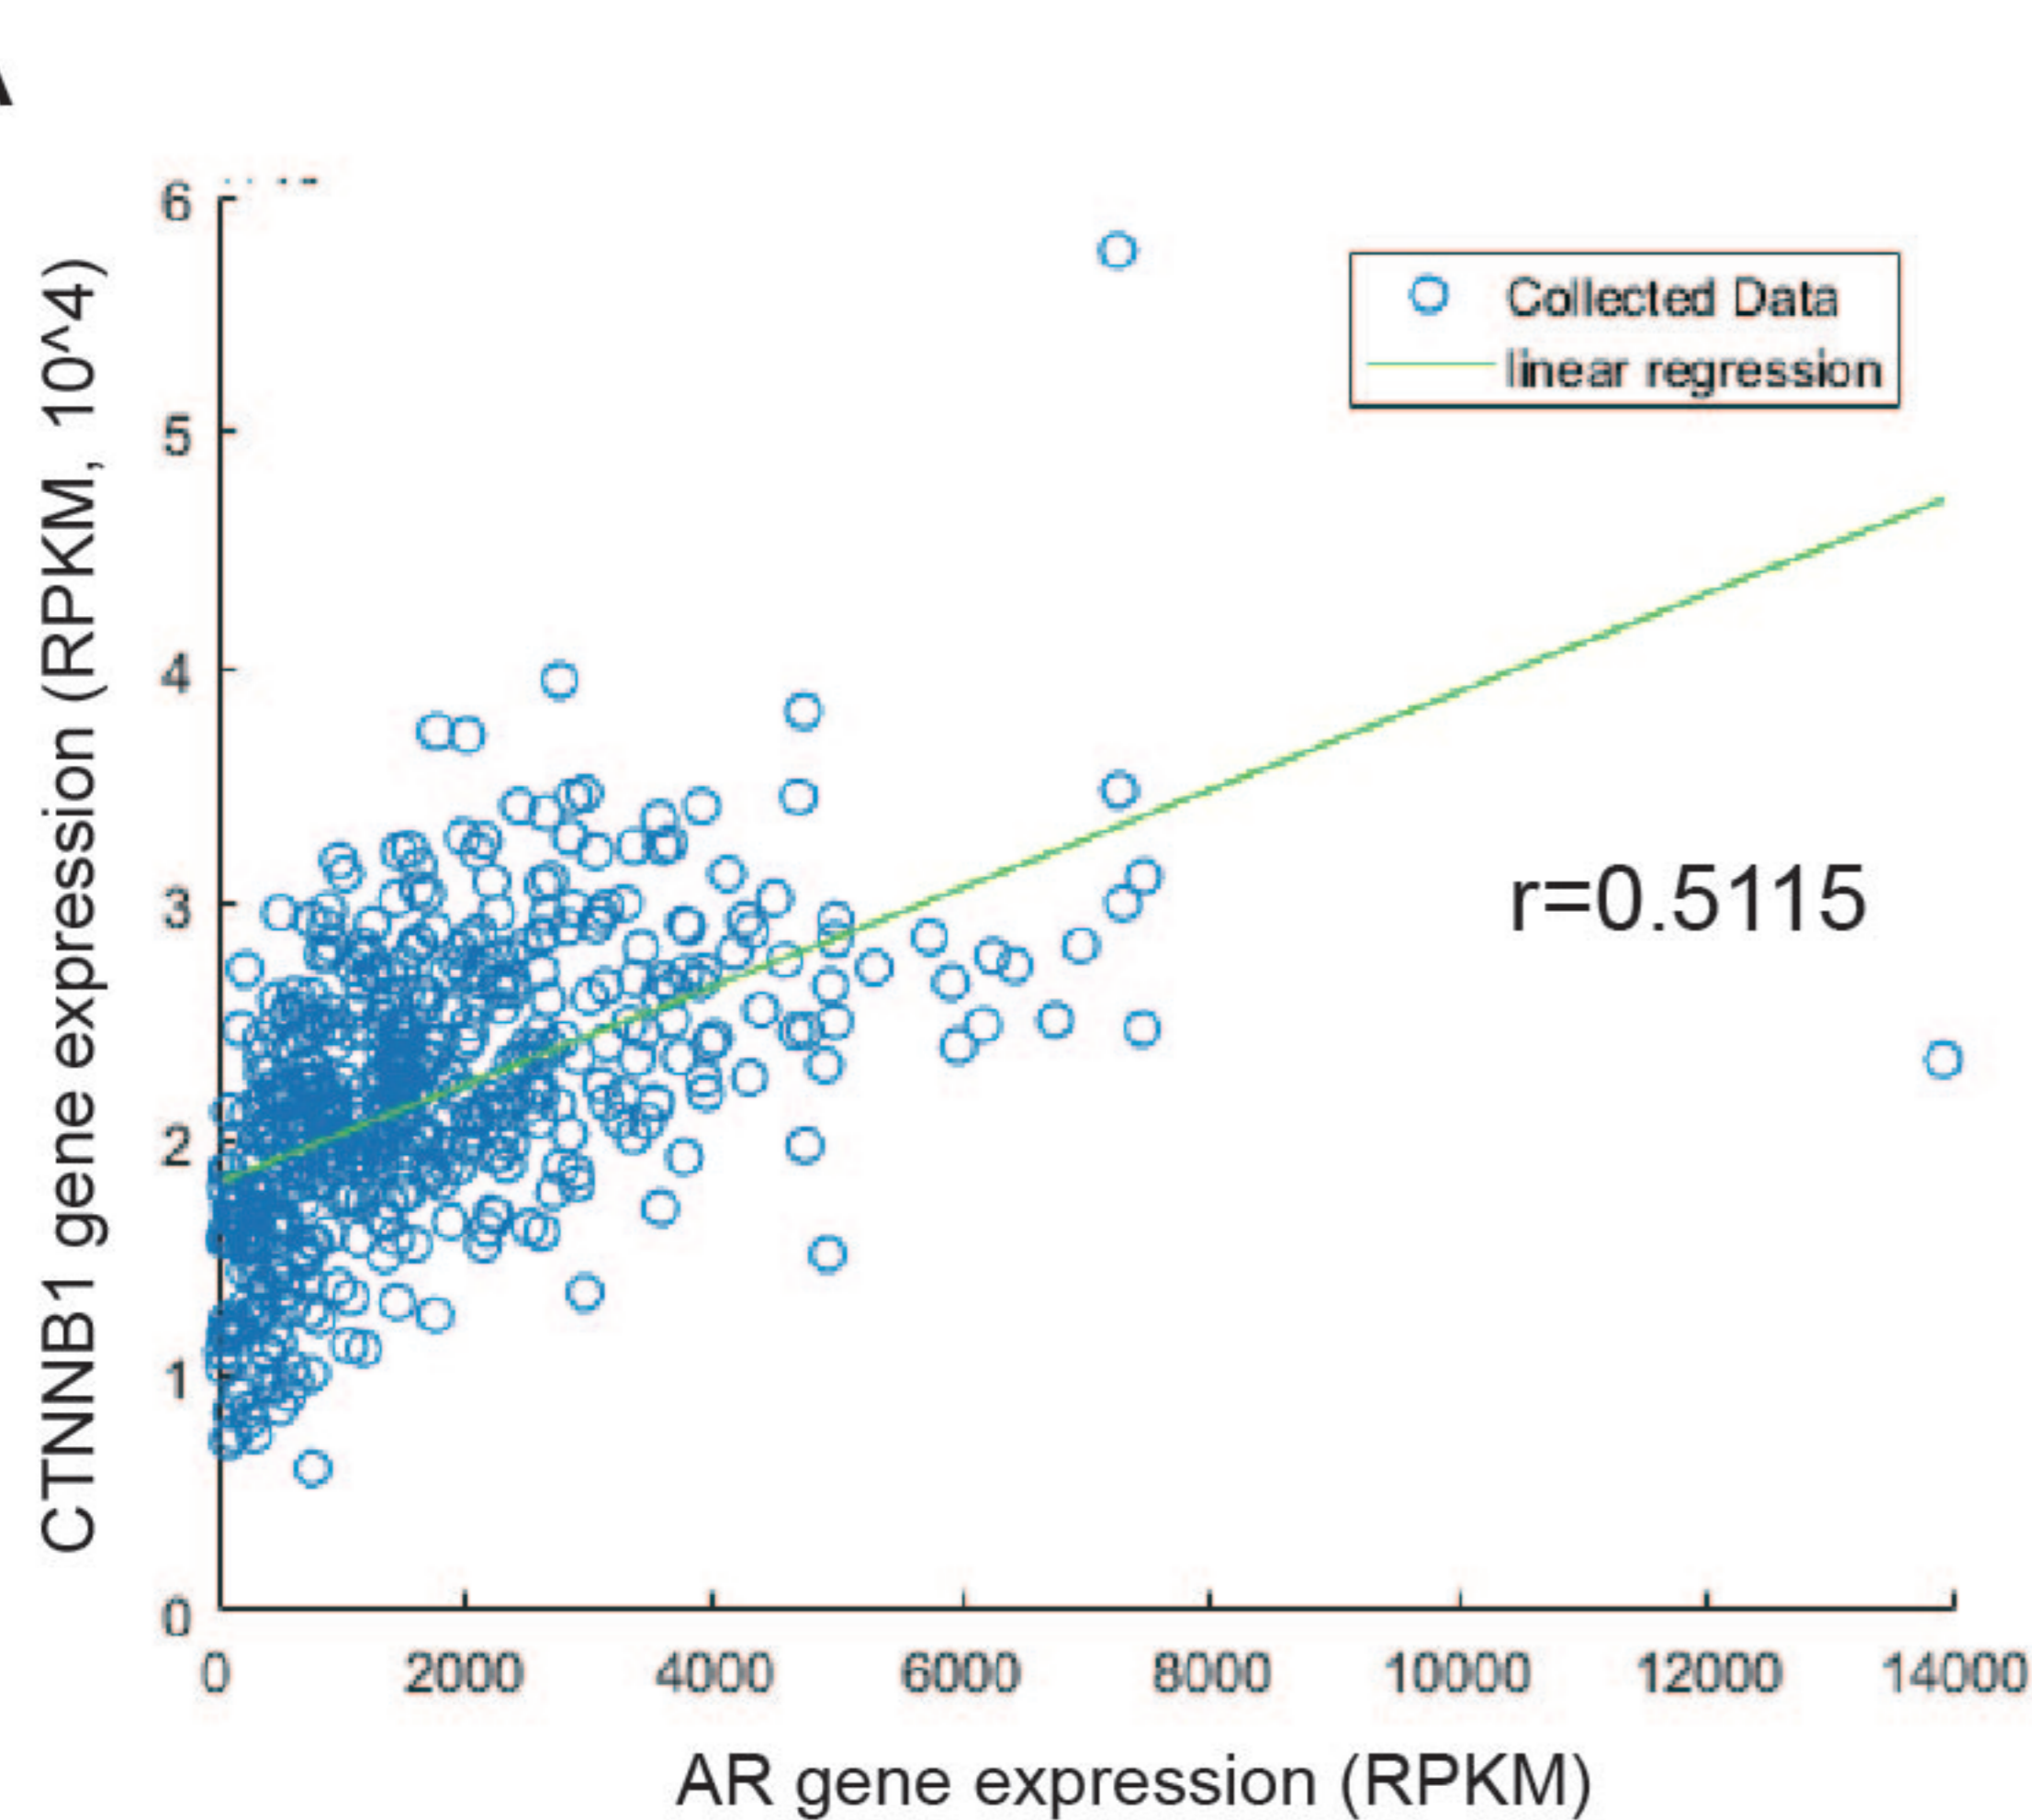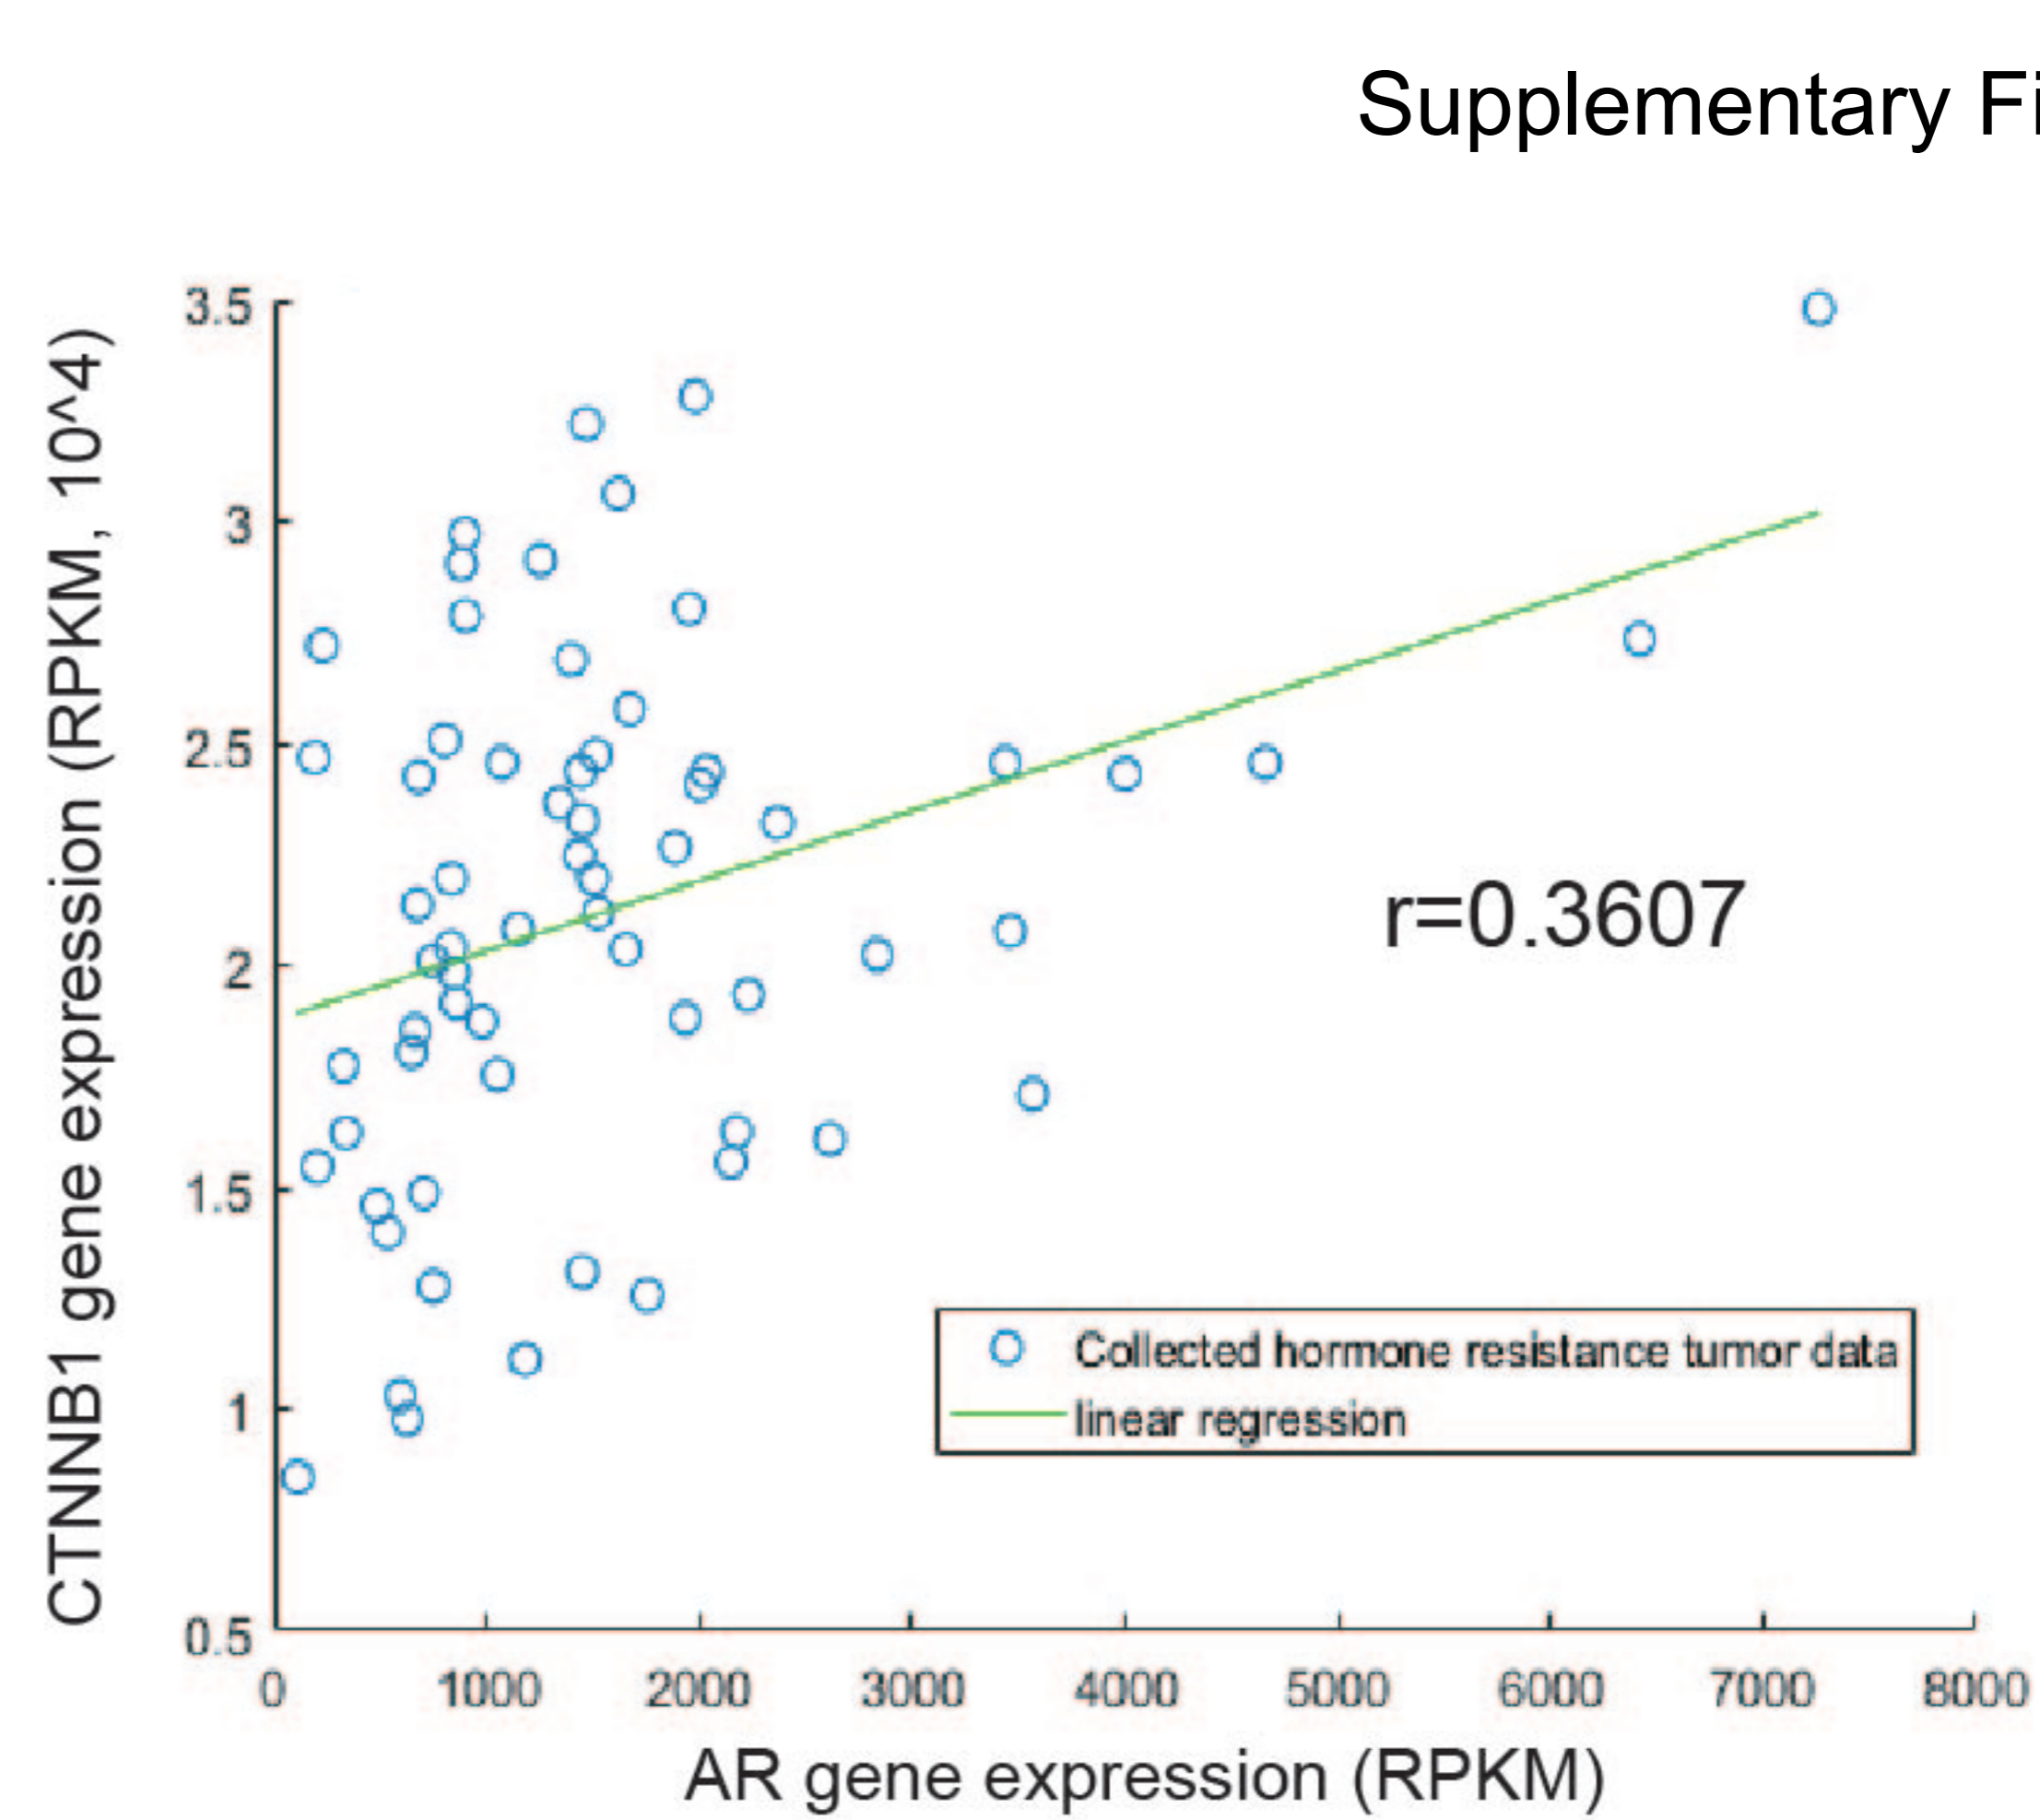

Networks 1,2,3 Merged2

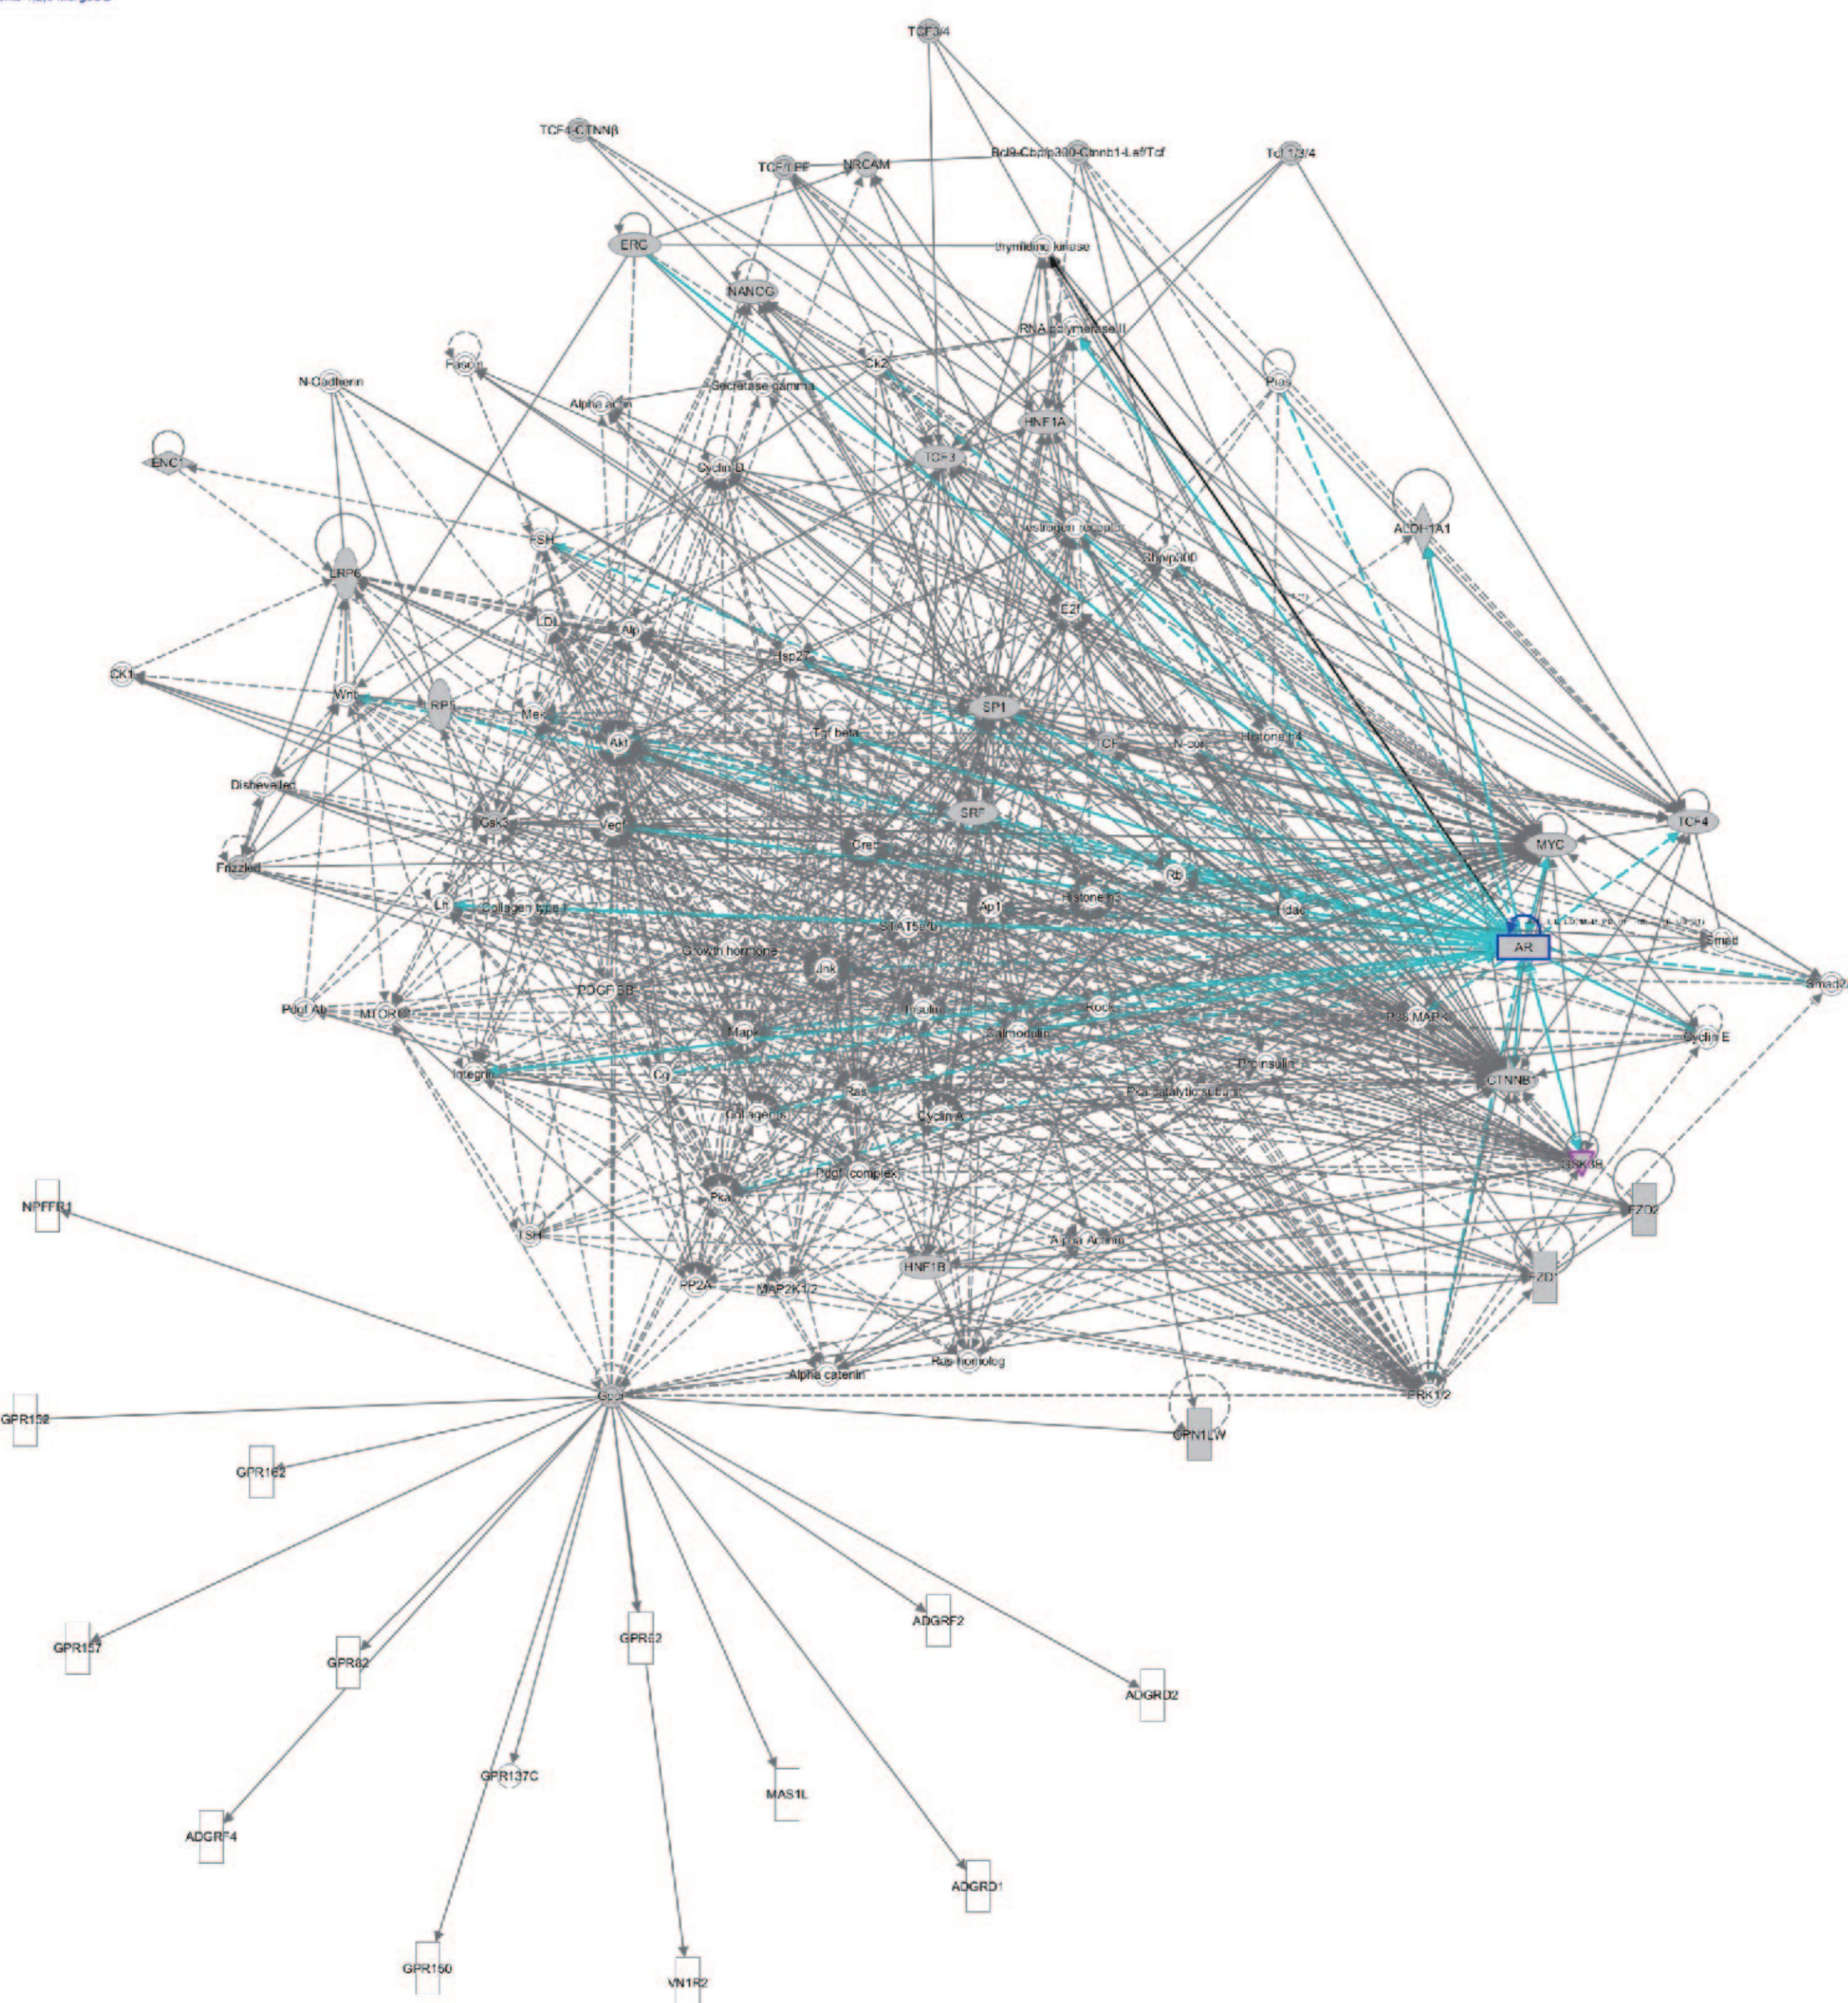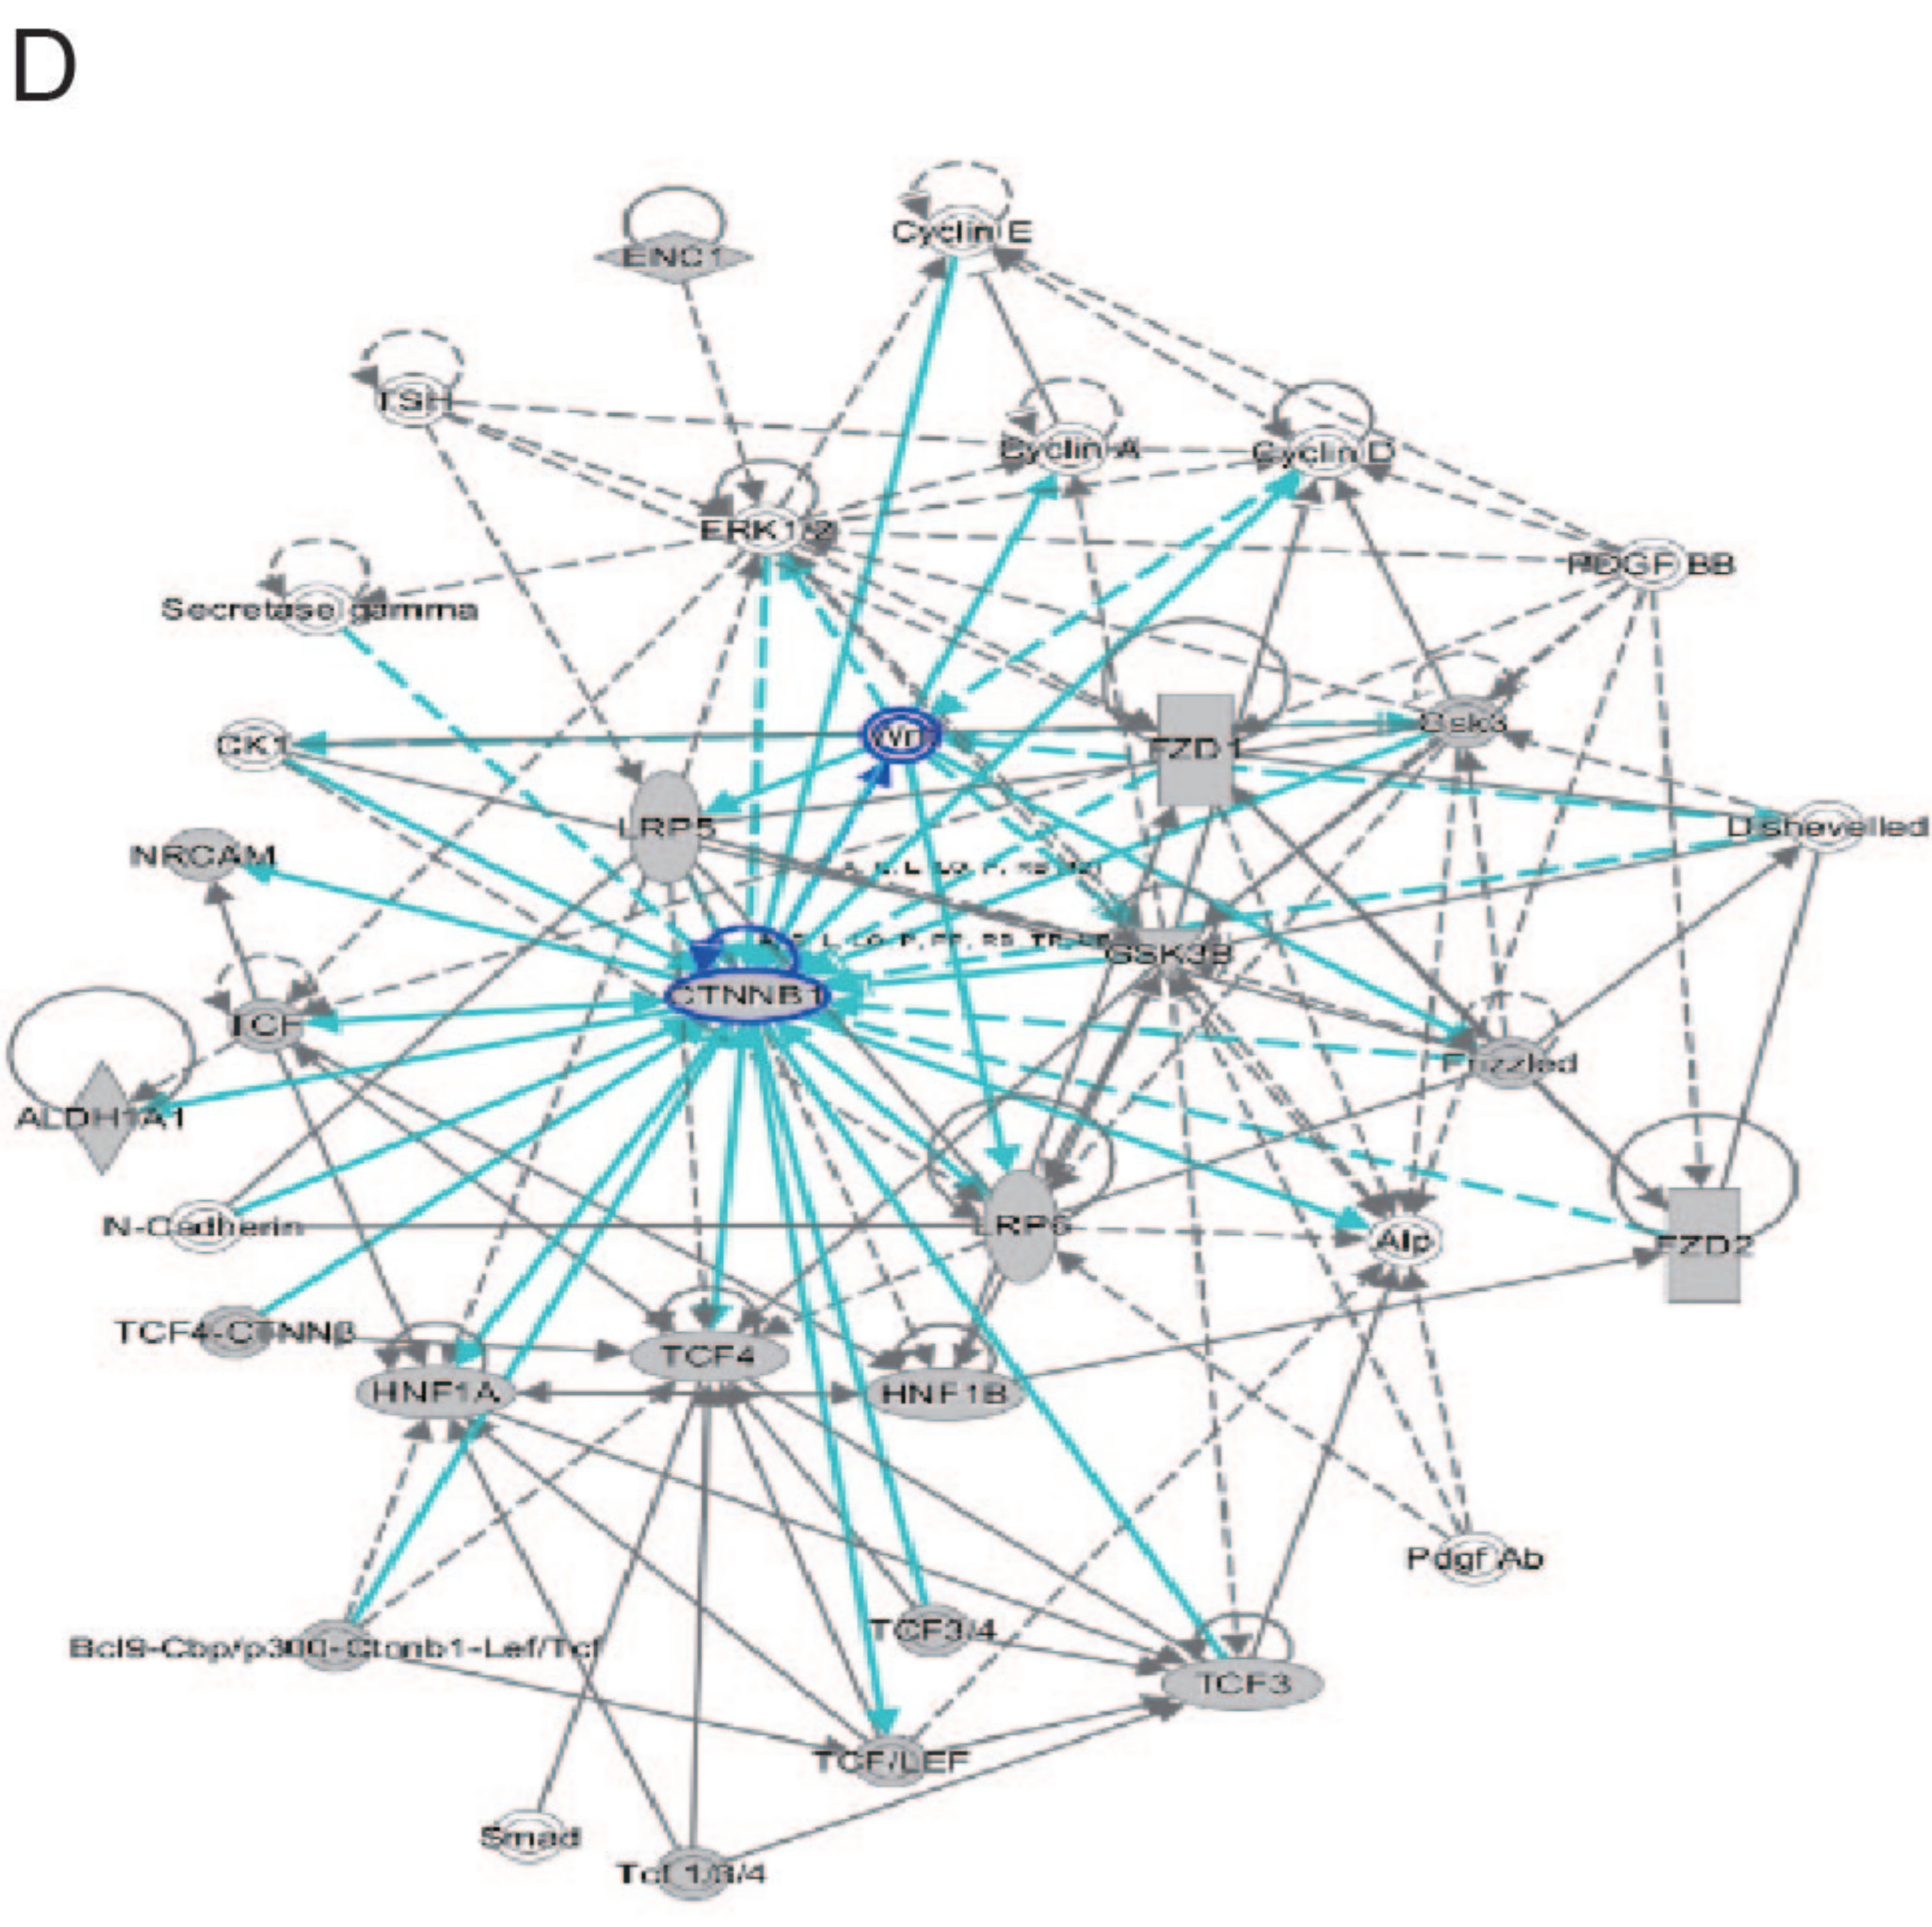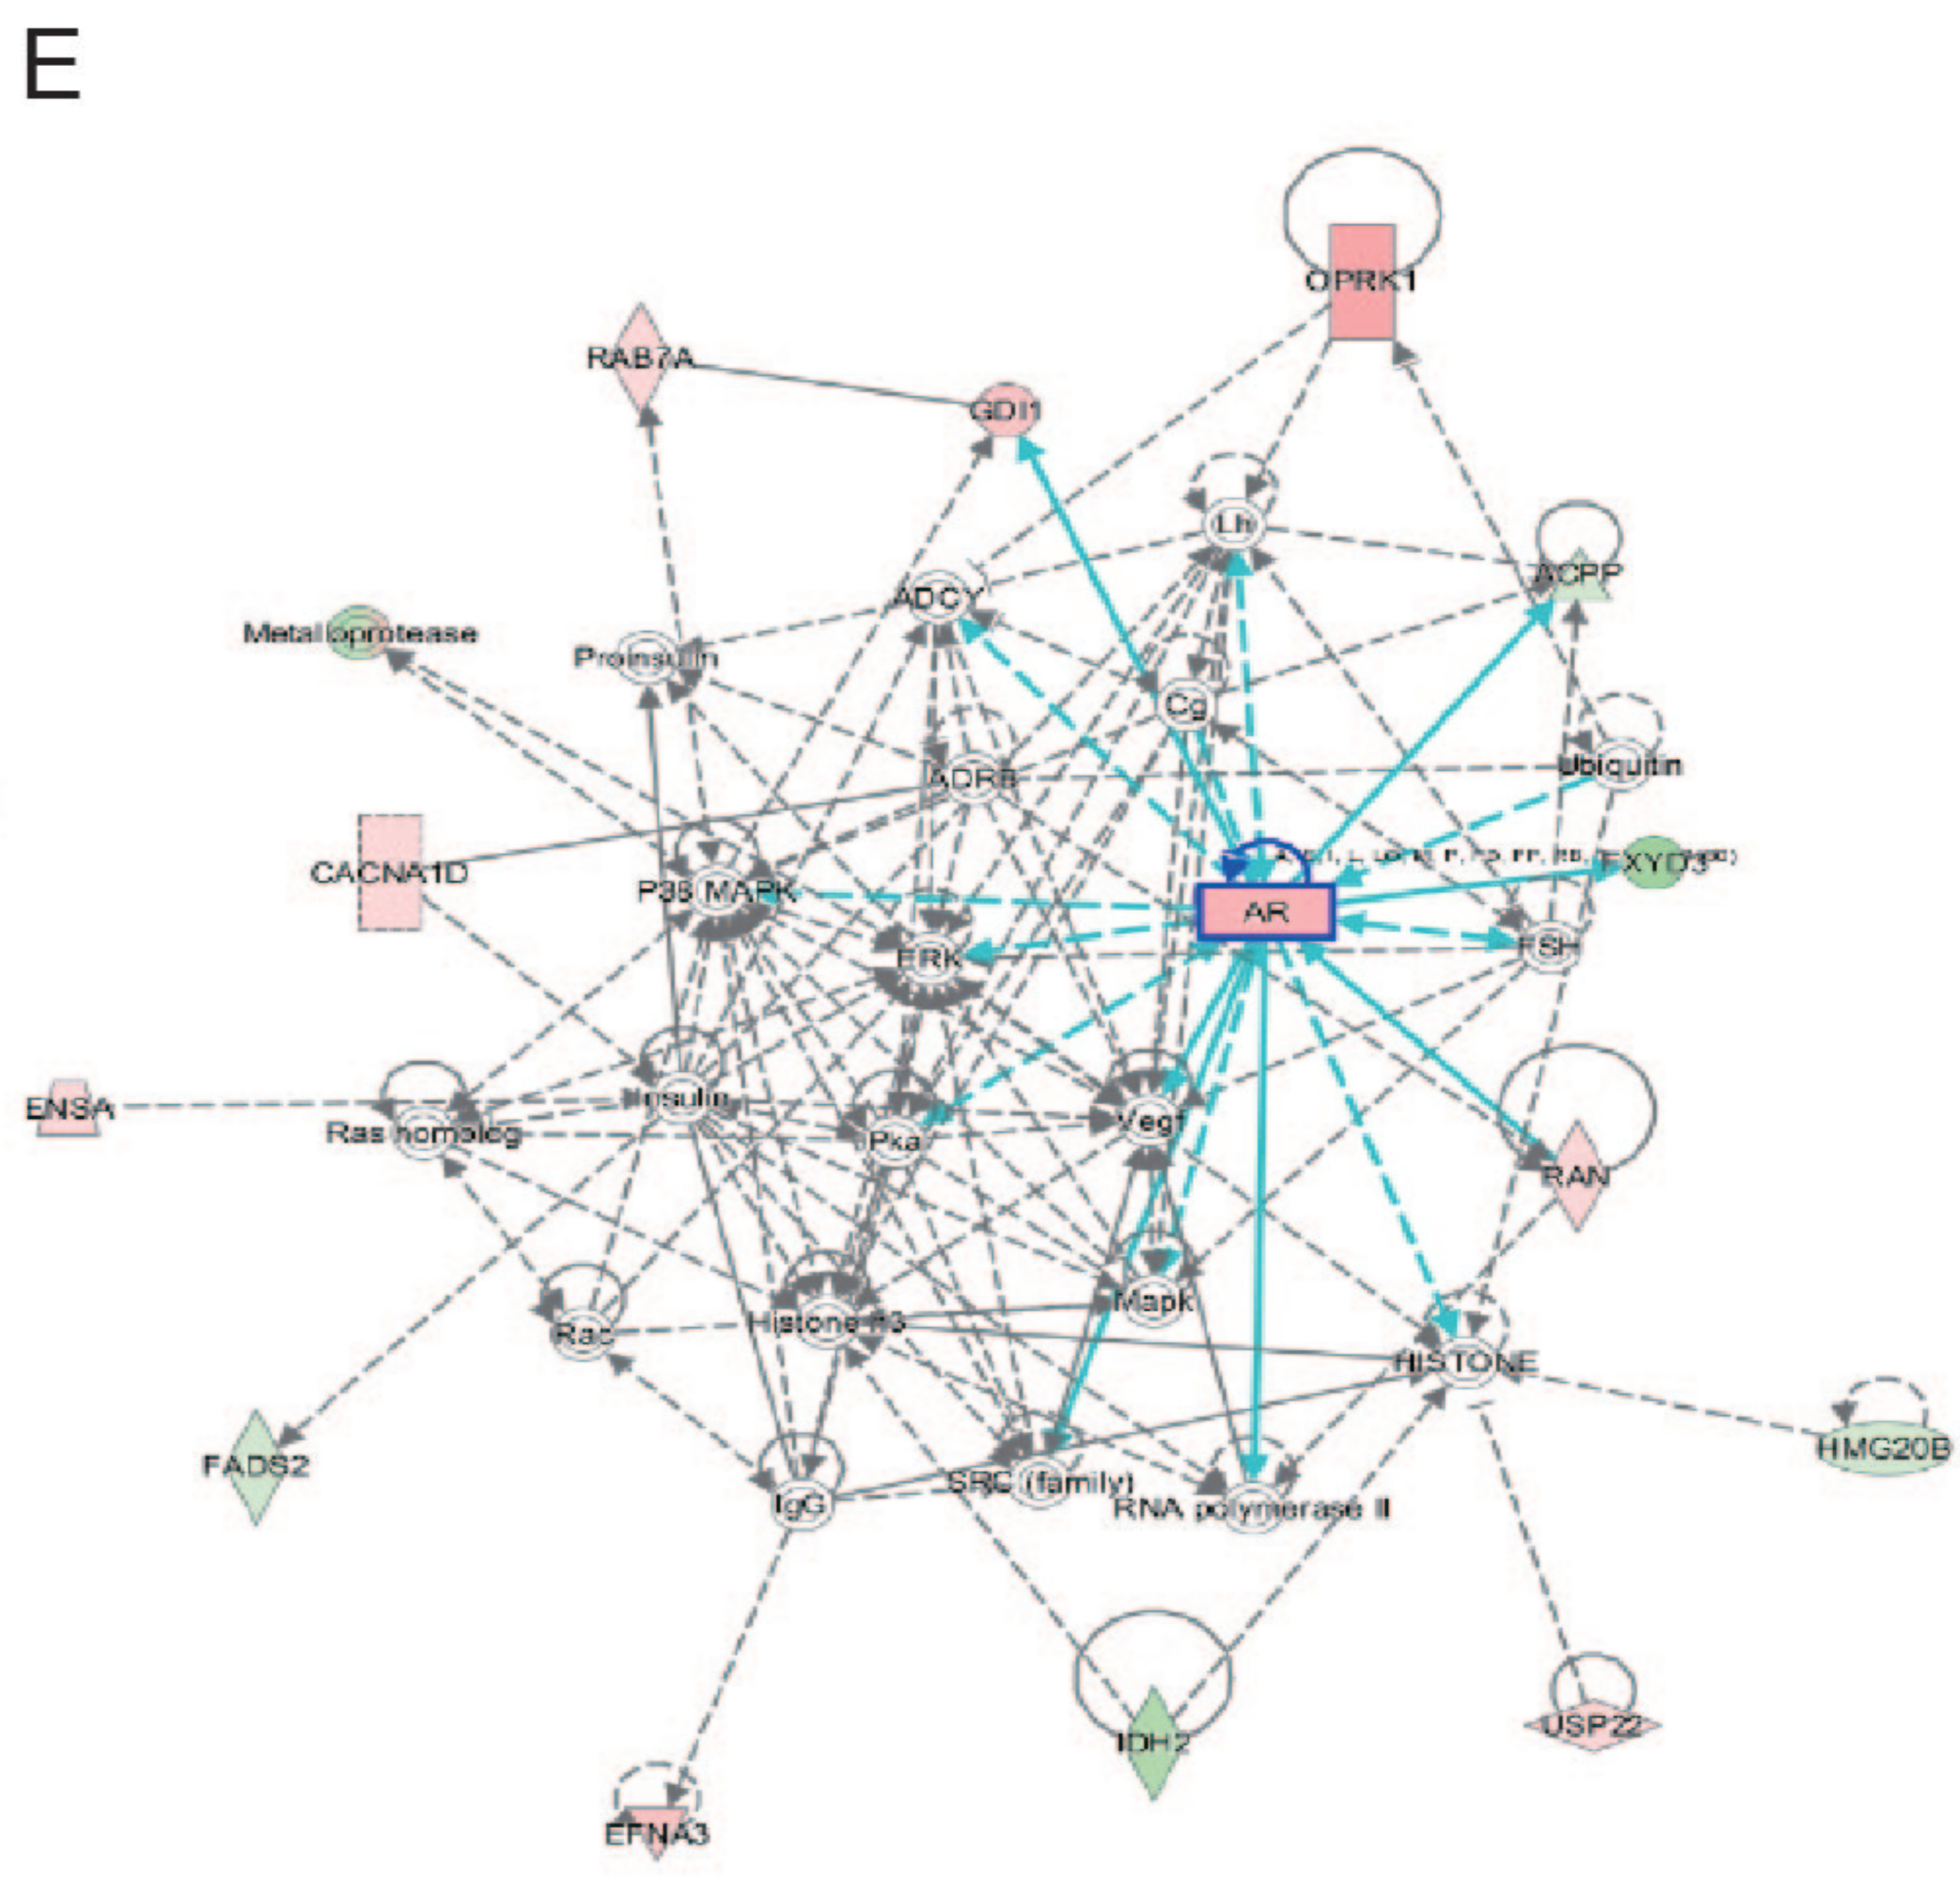

A

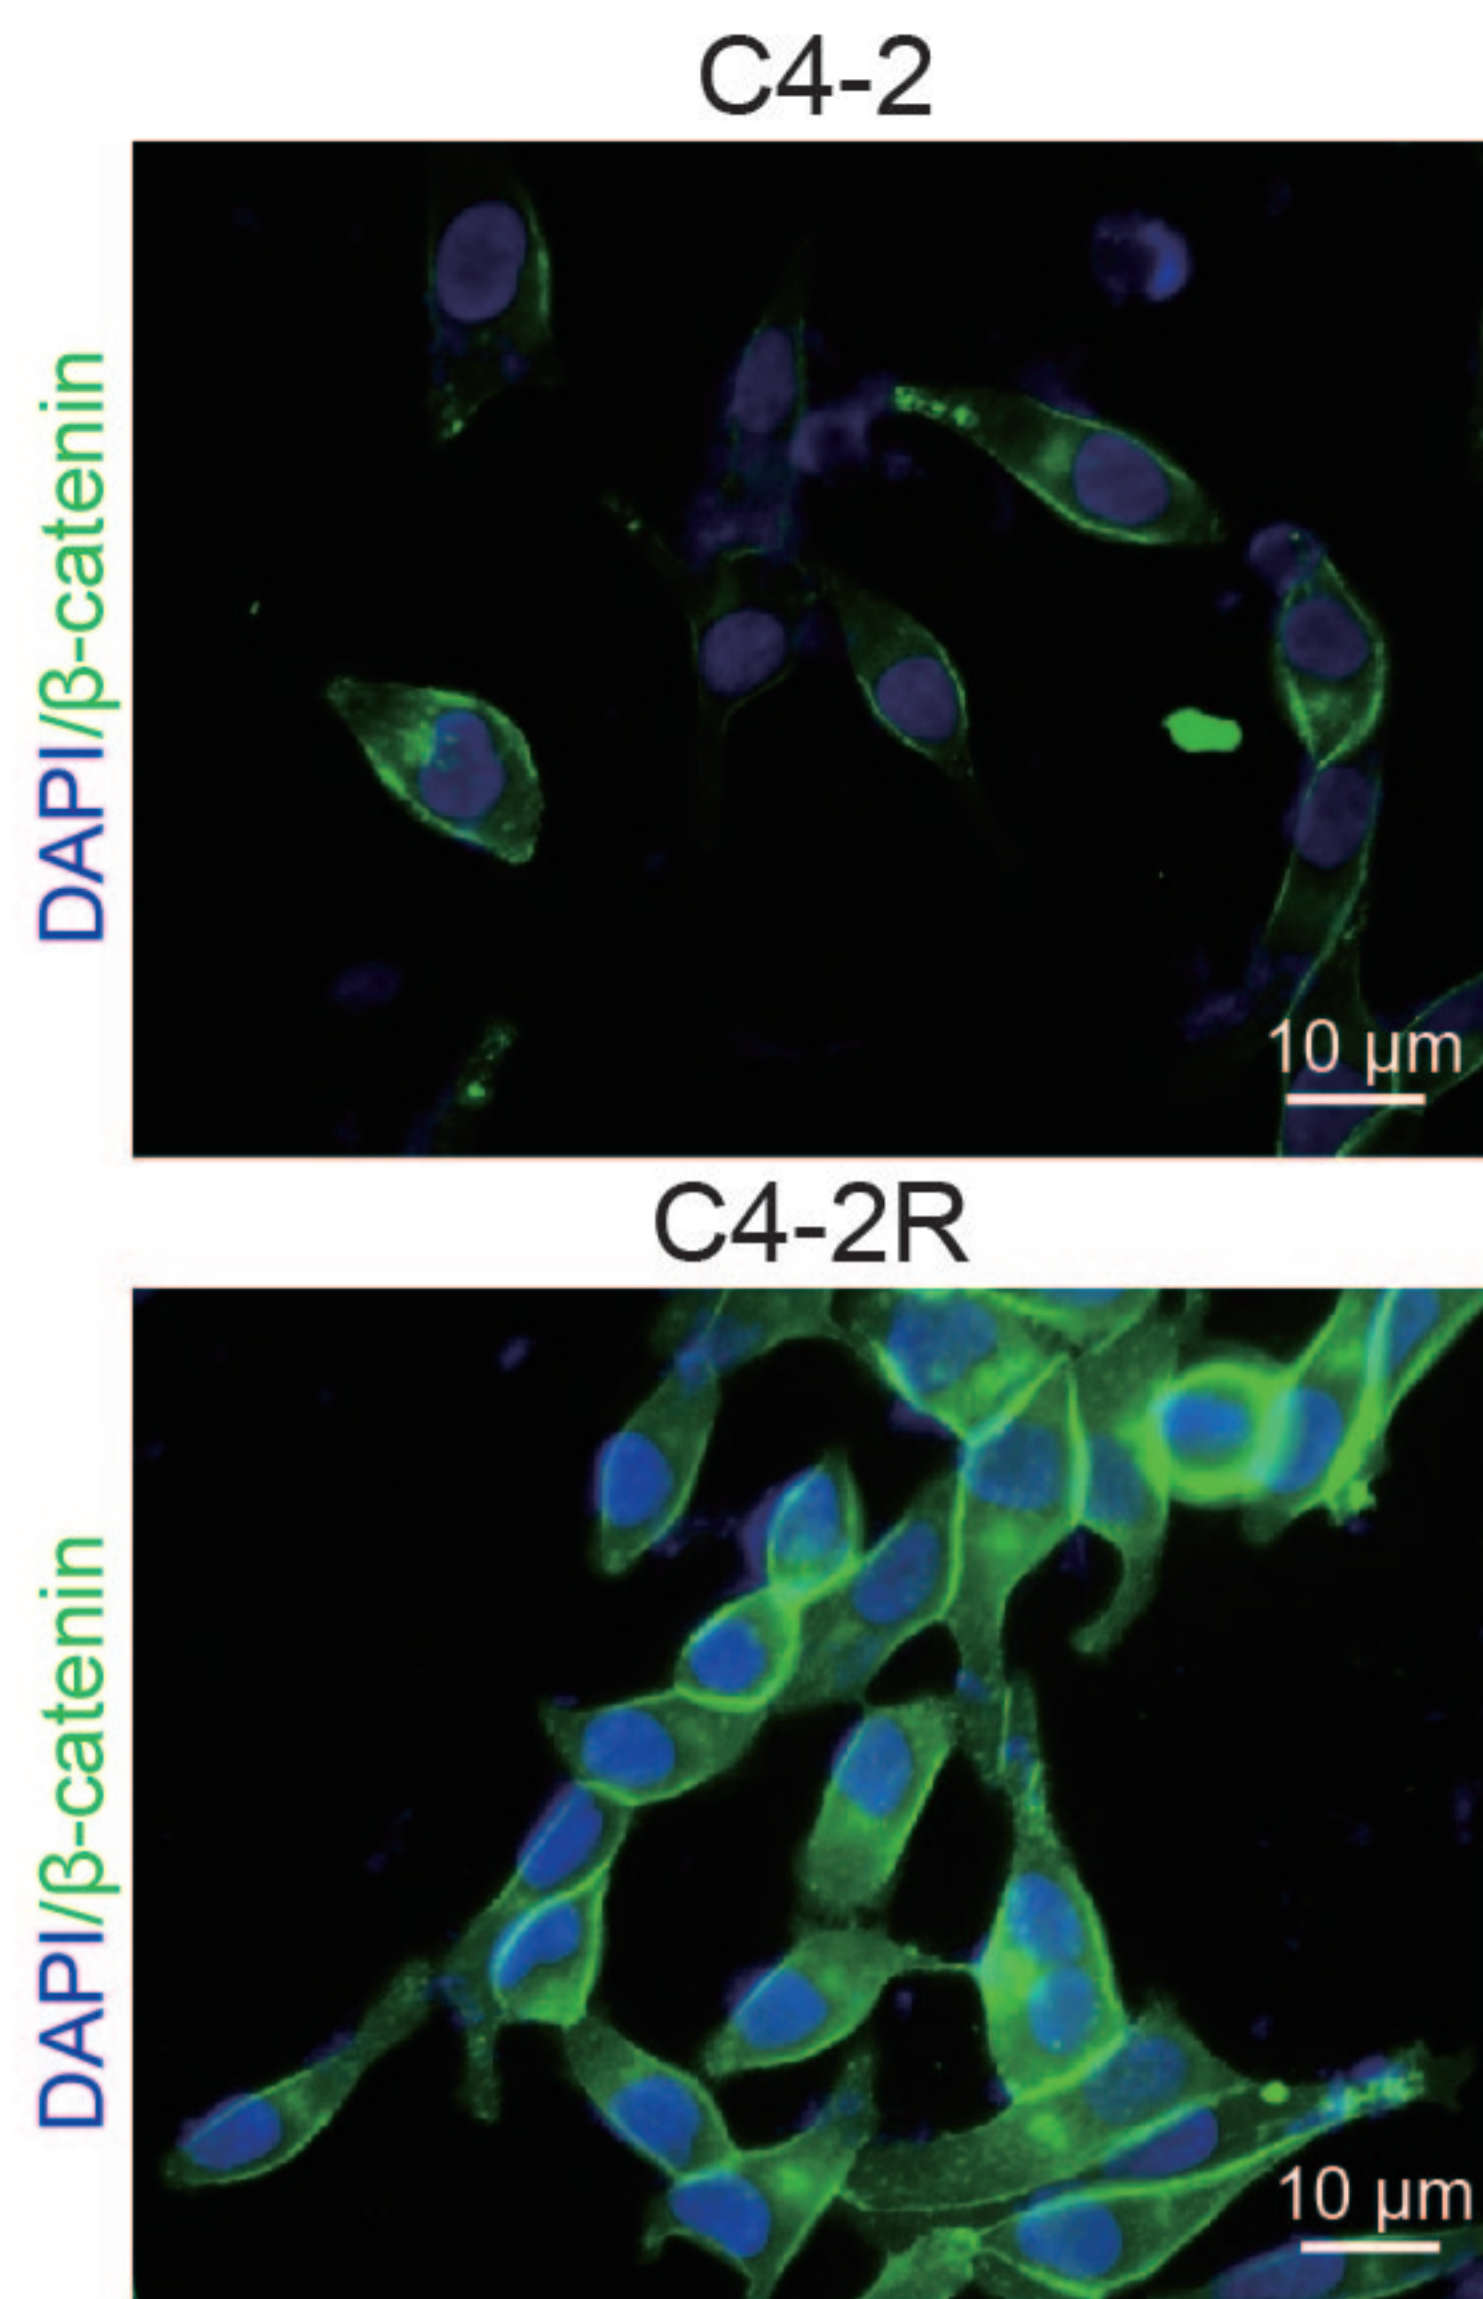

D

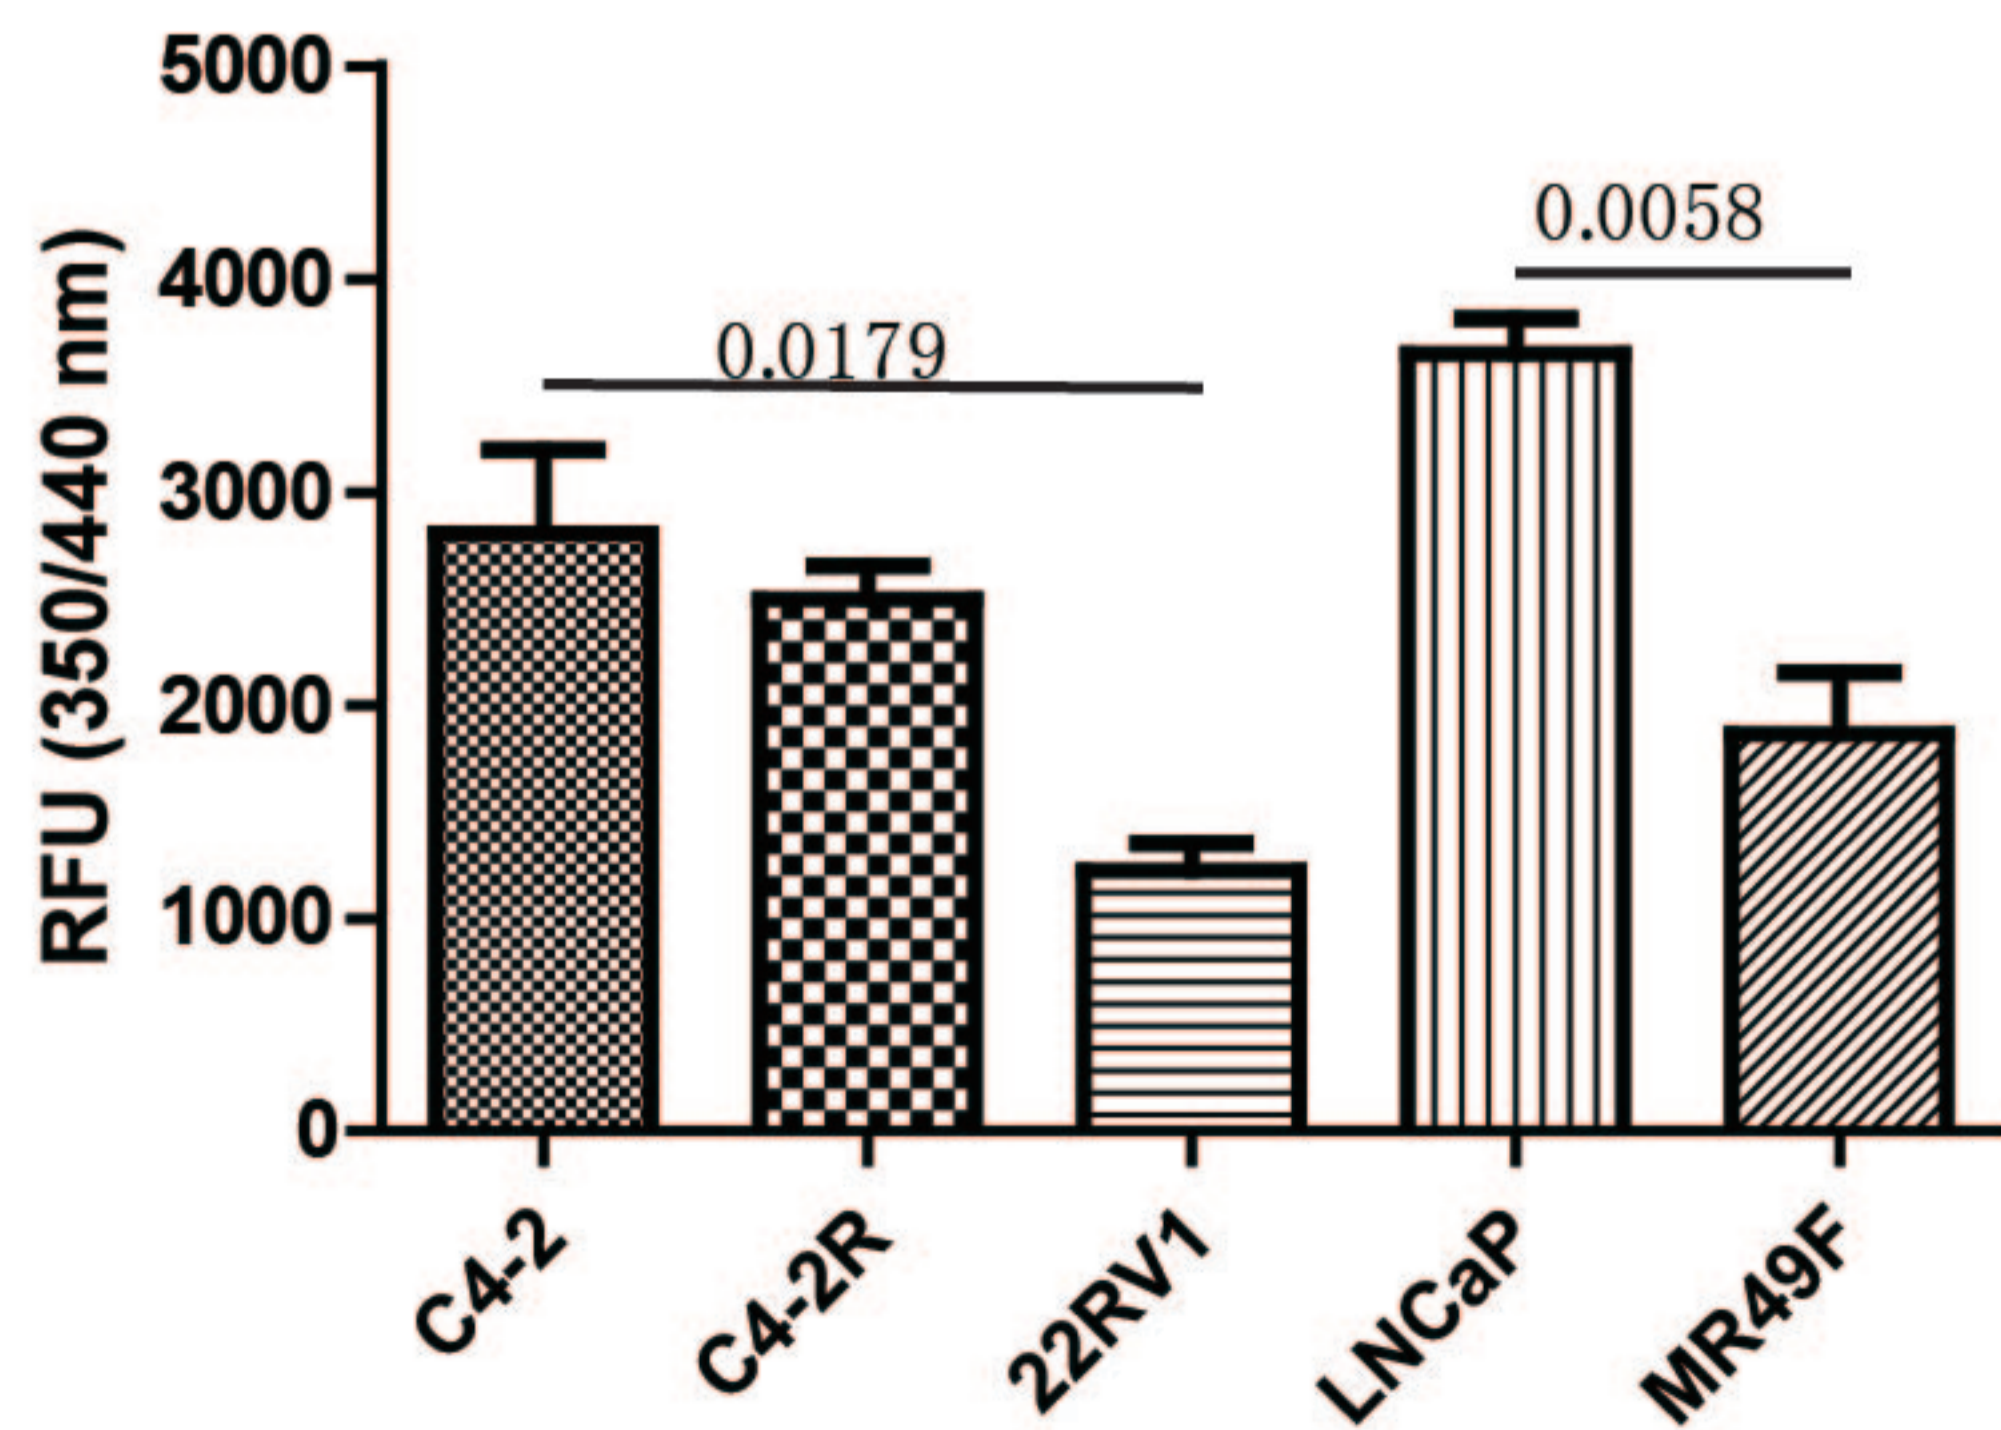

B

Supplementary Fig S2

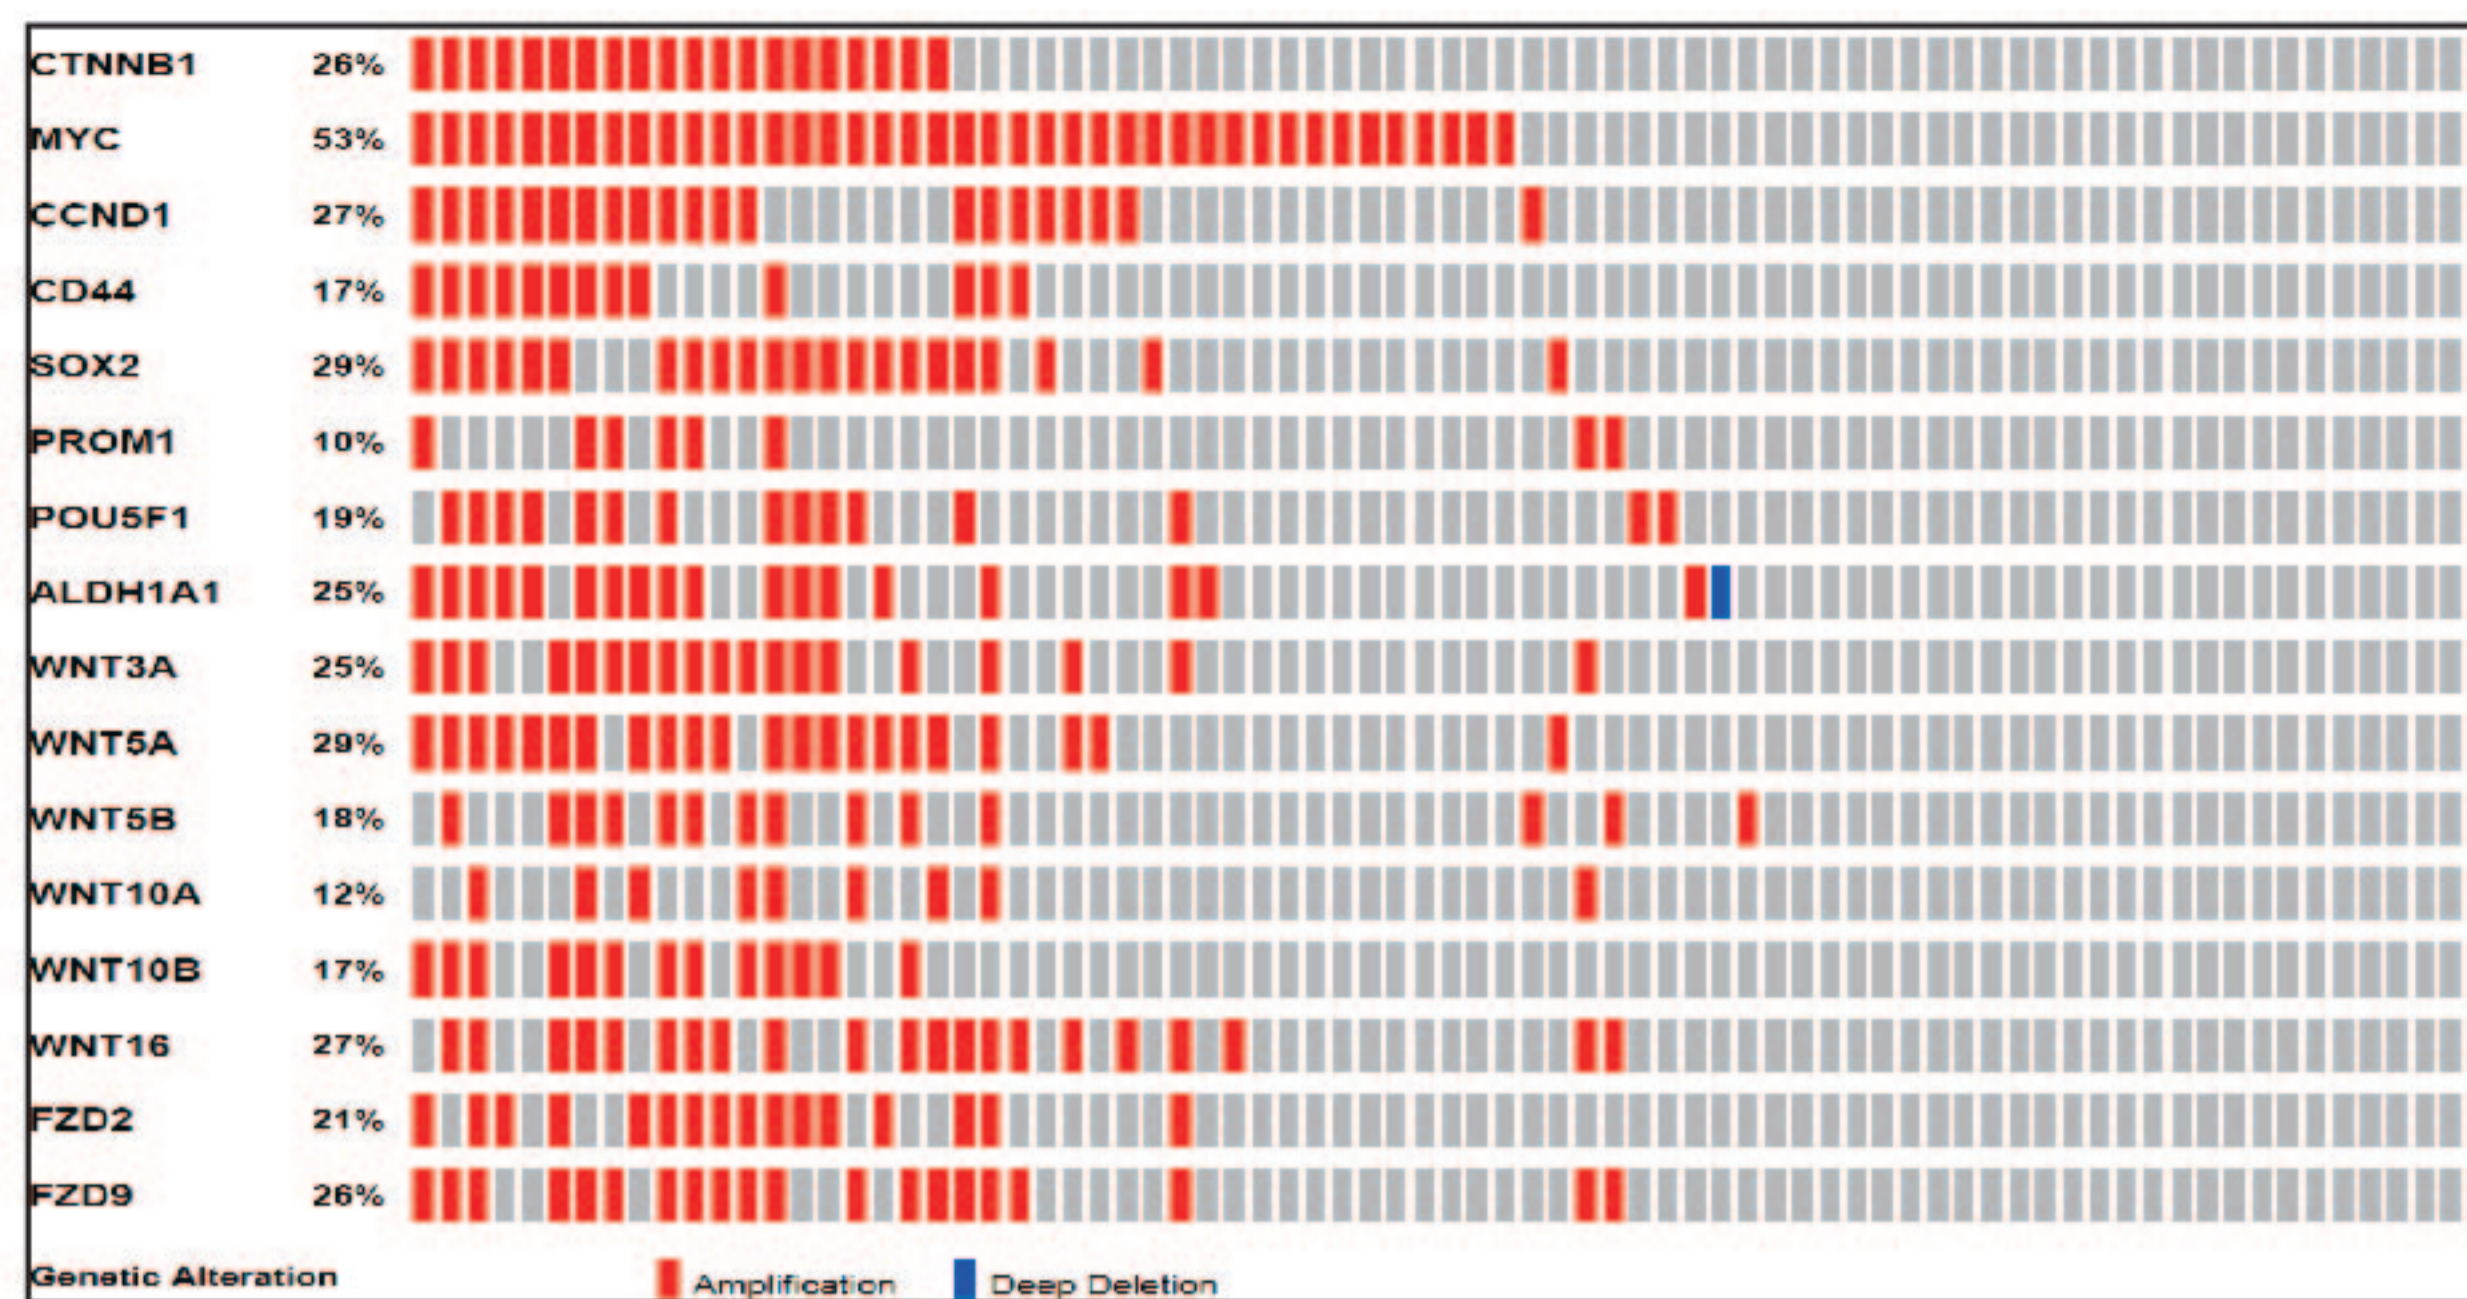

C

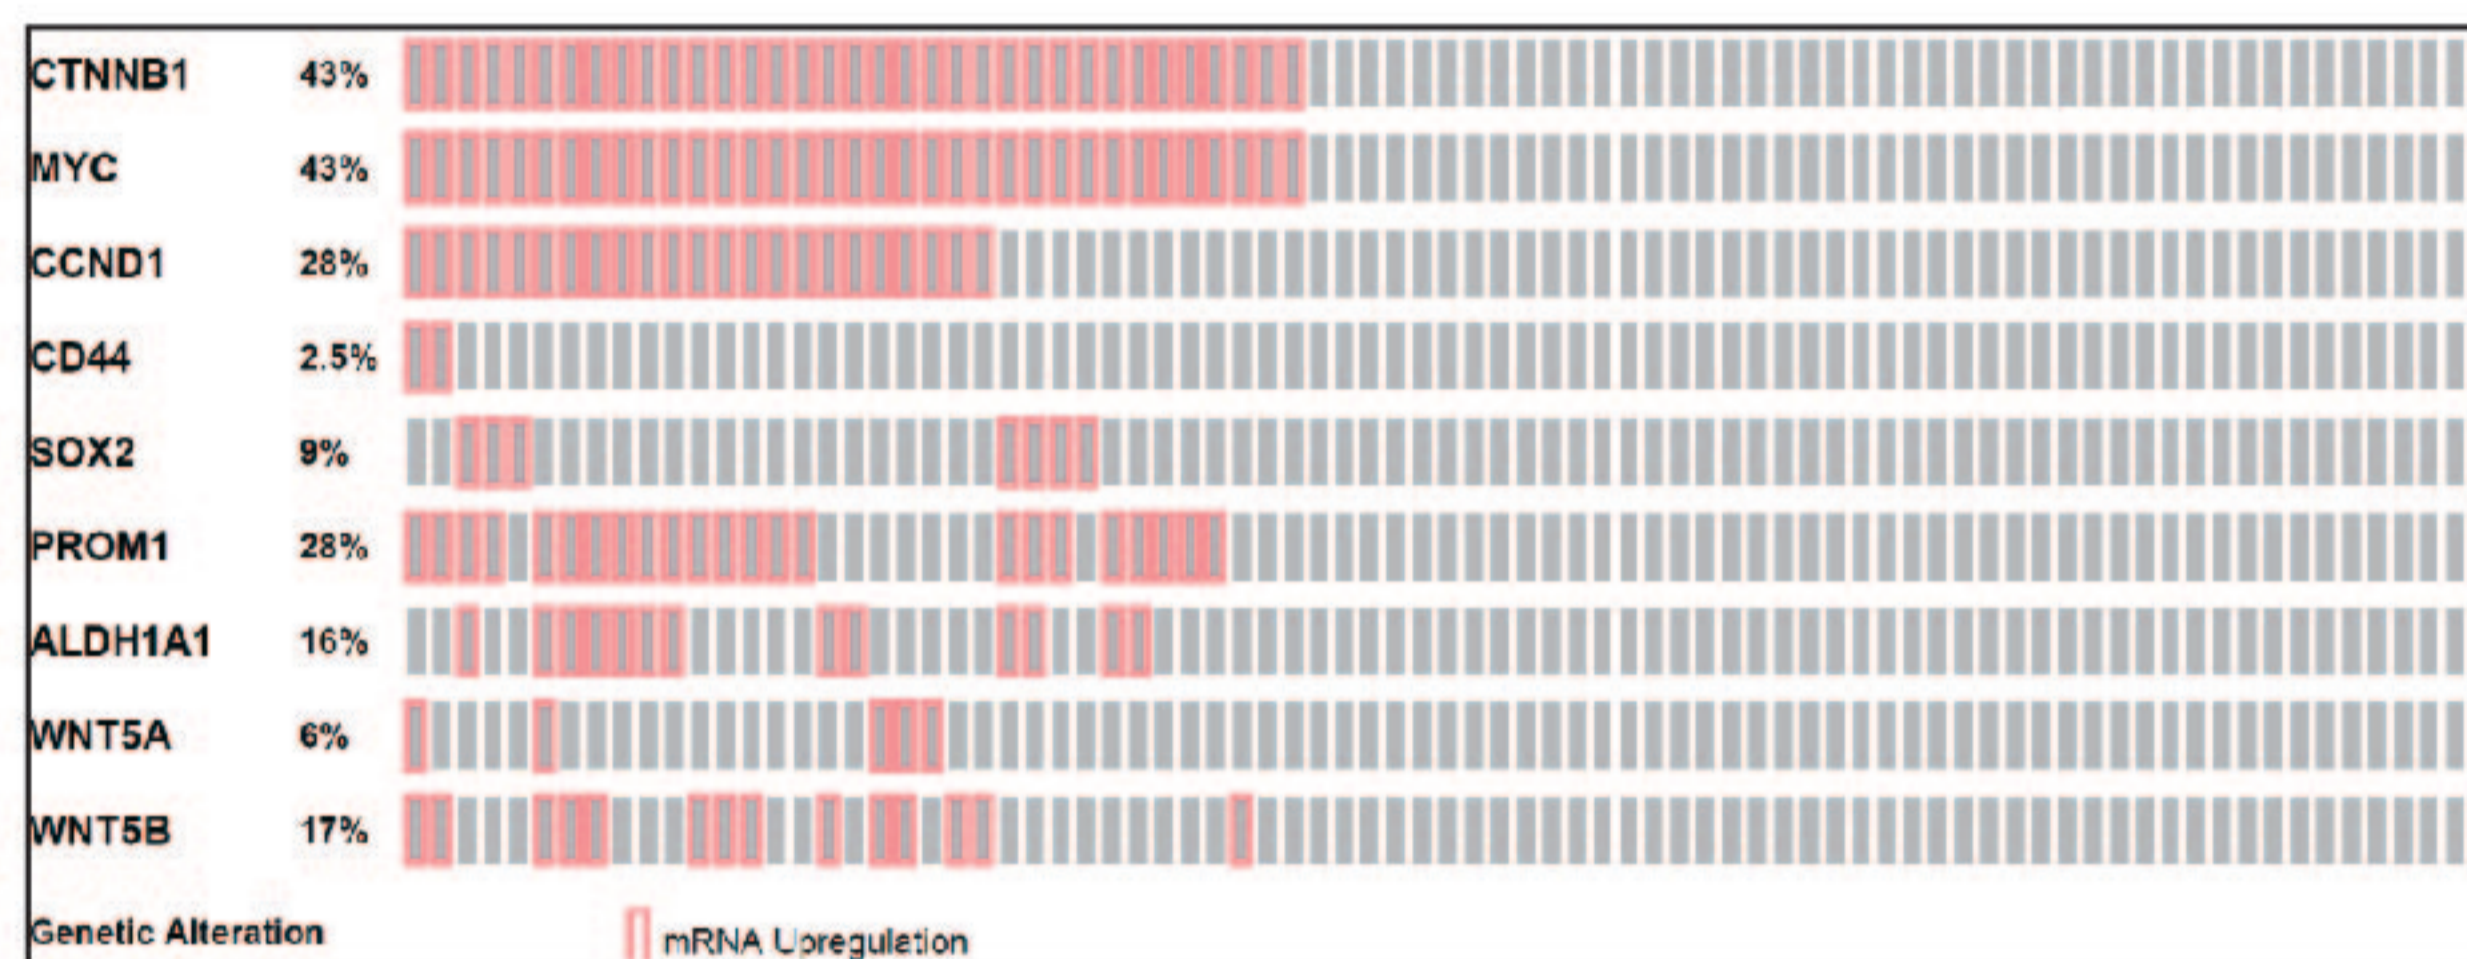

E

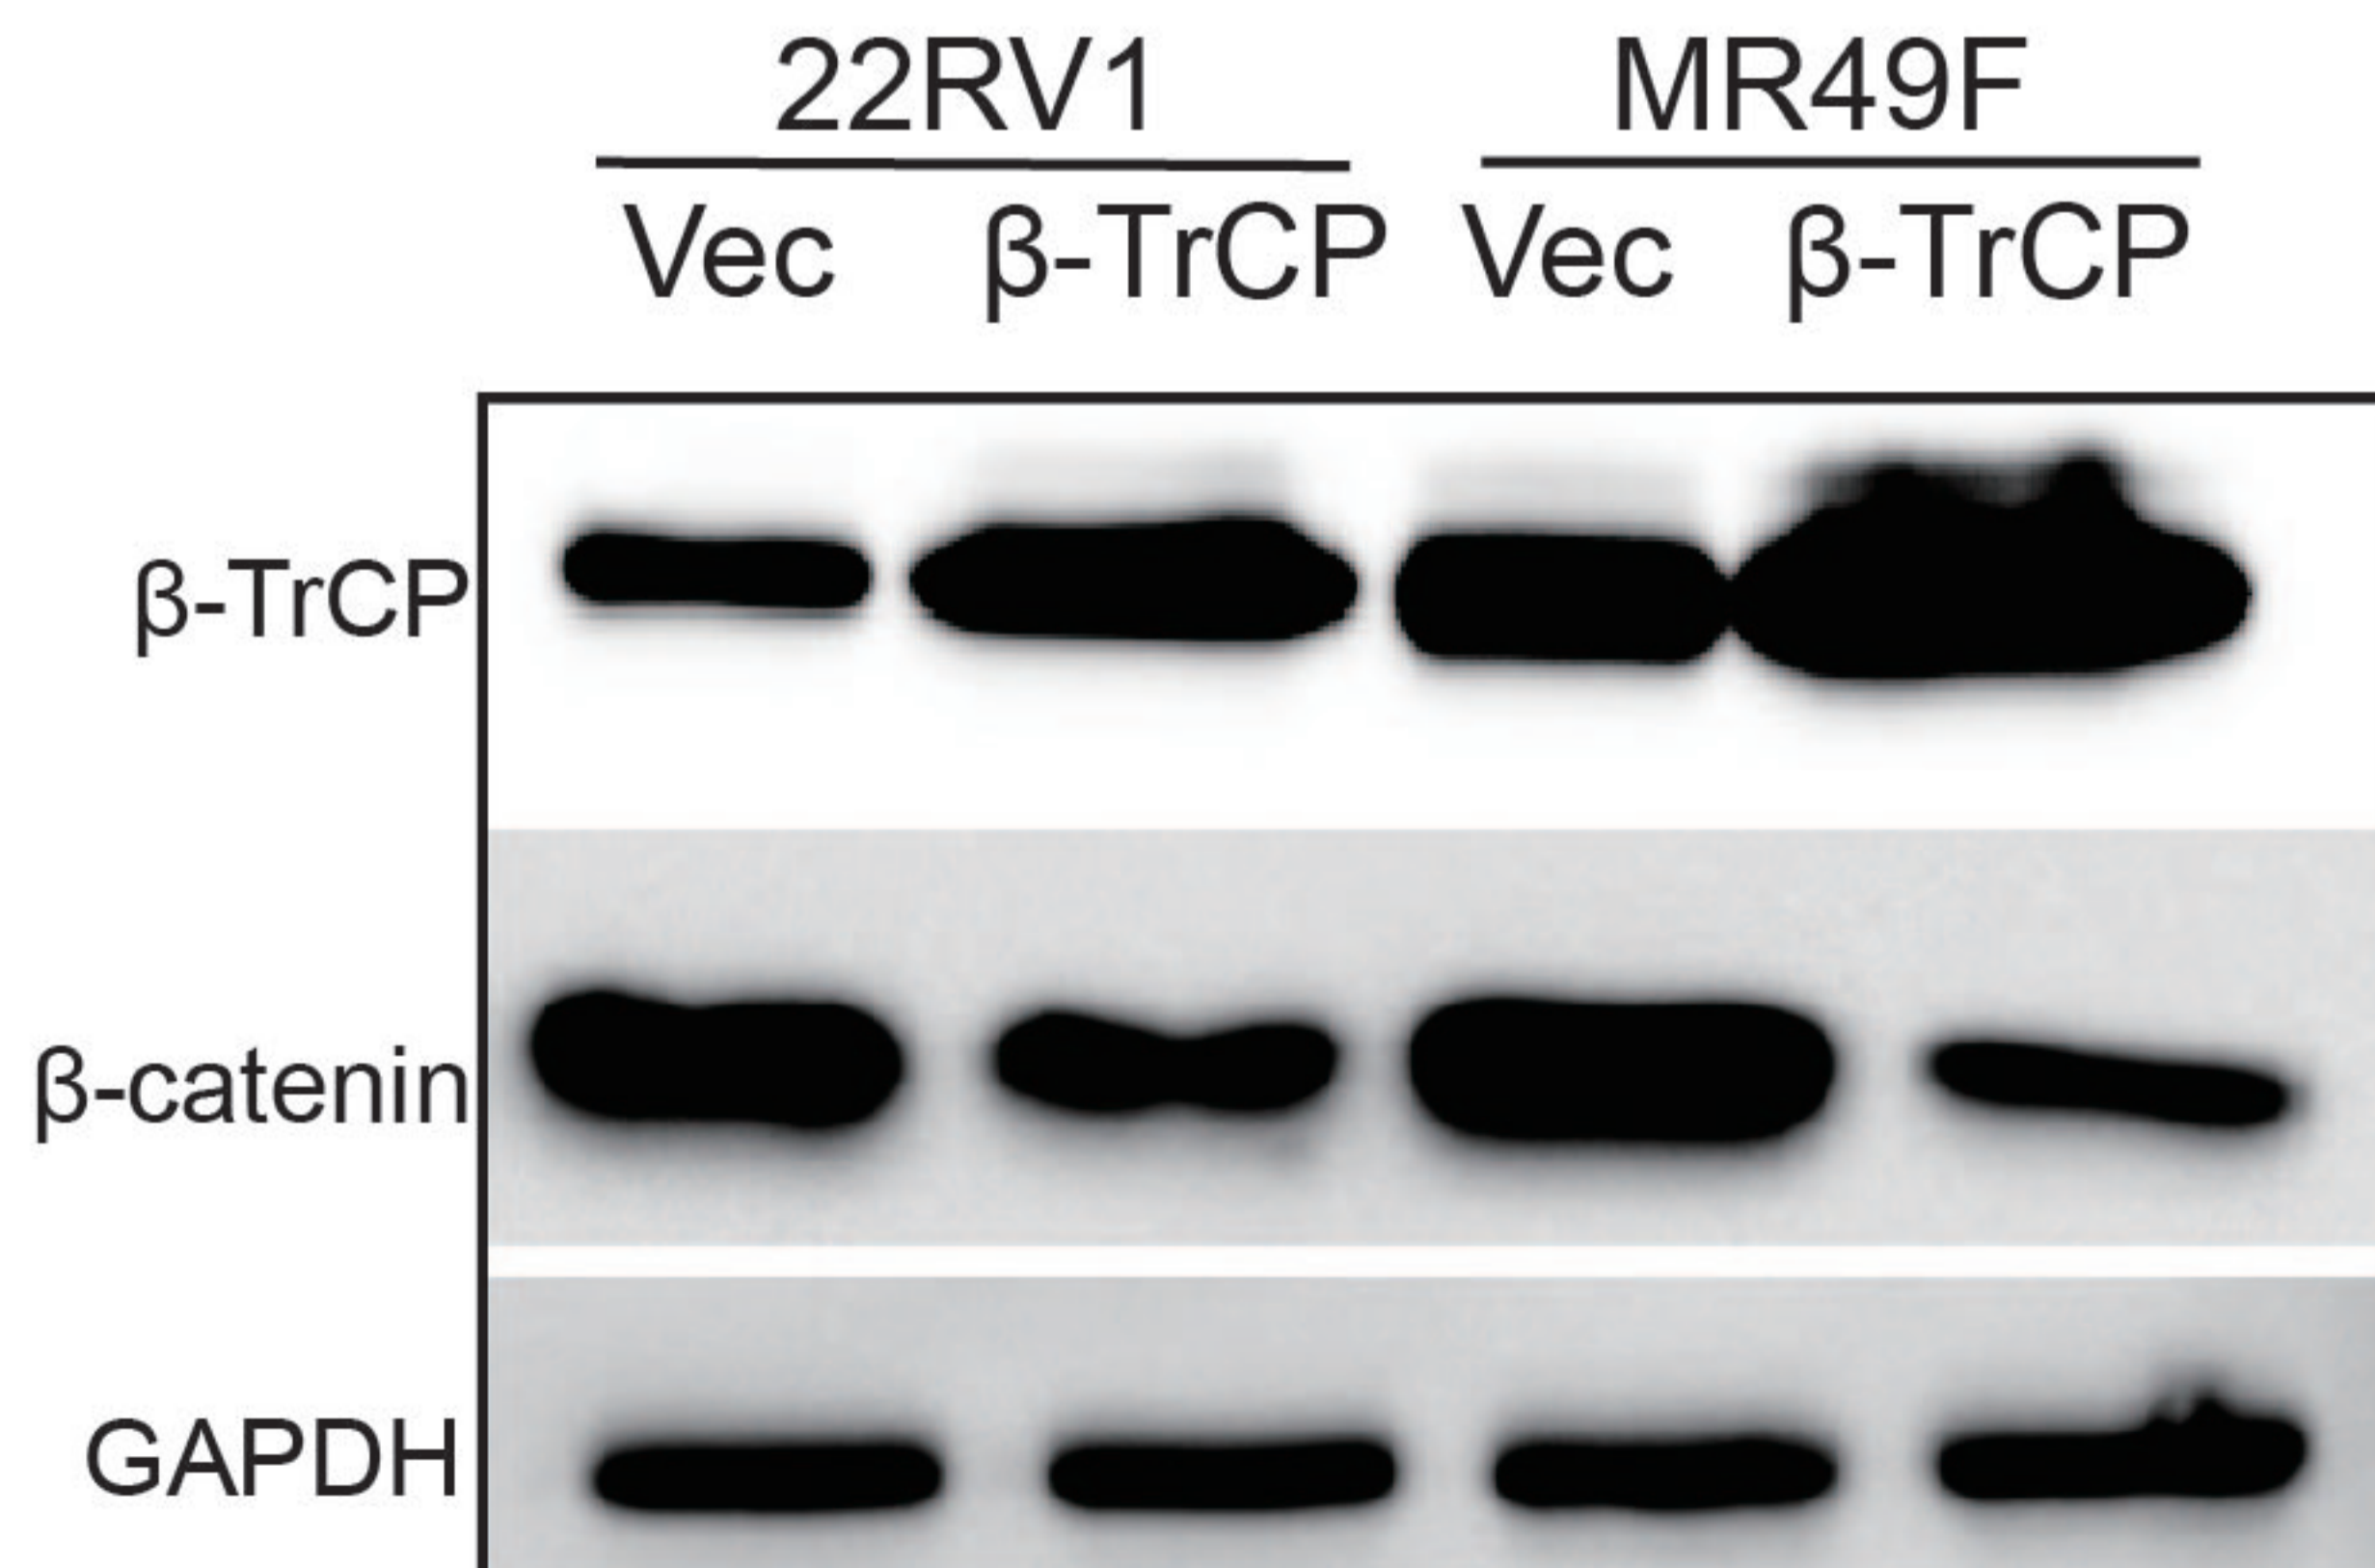

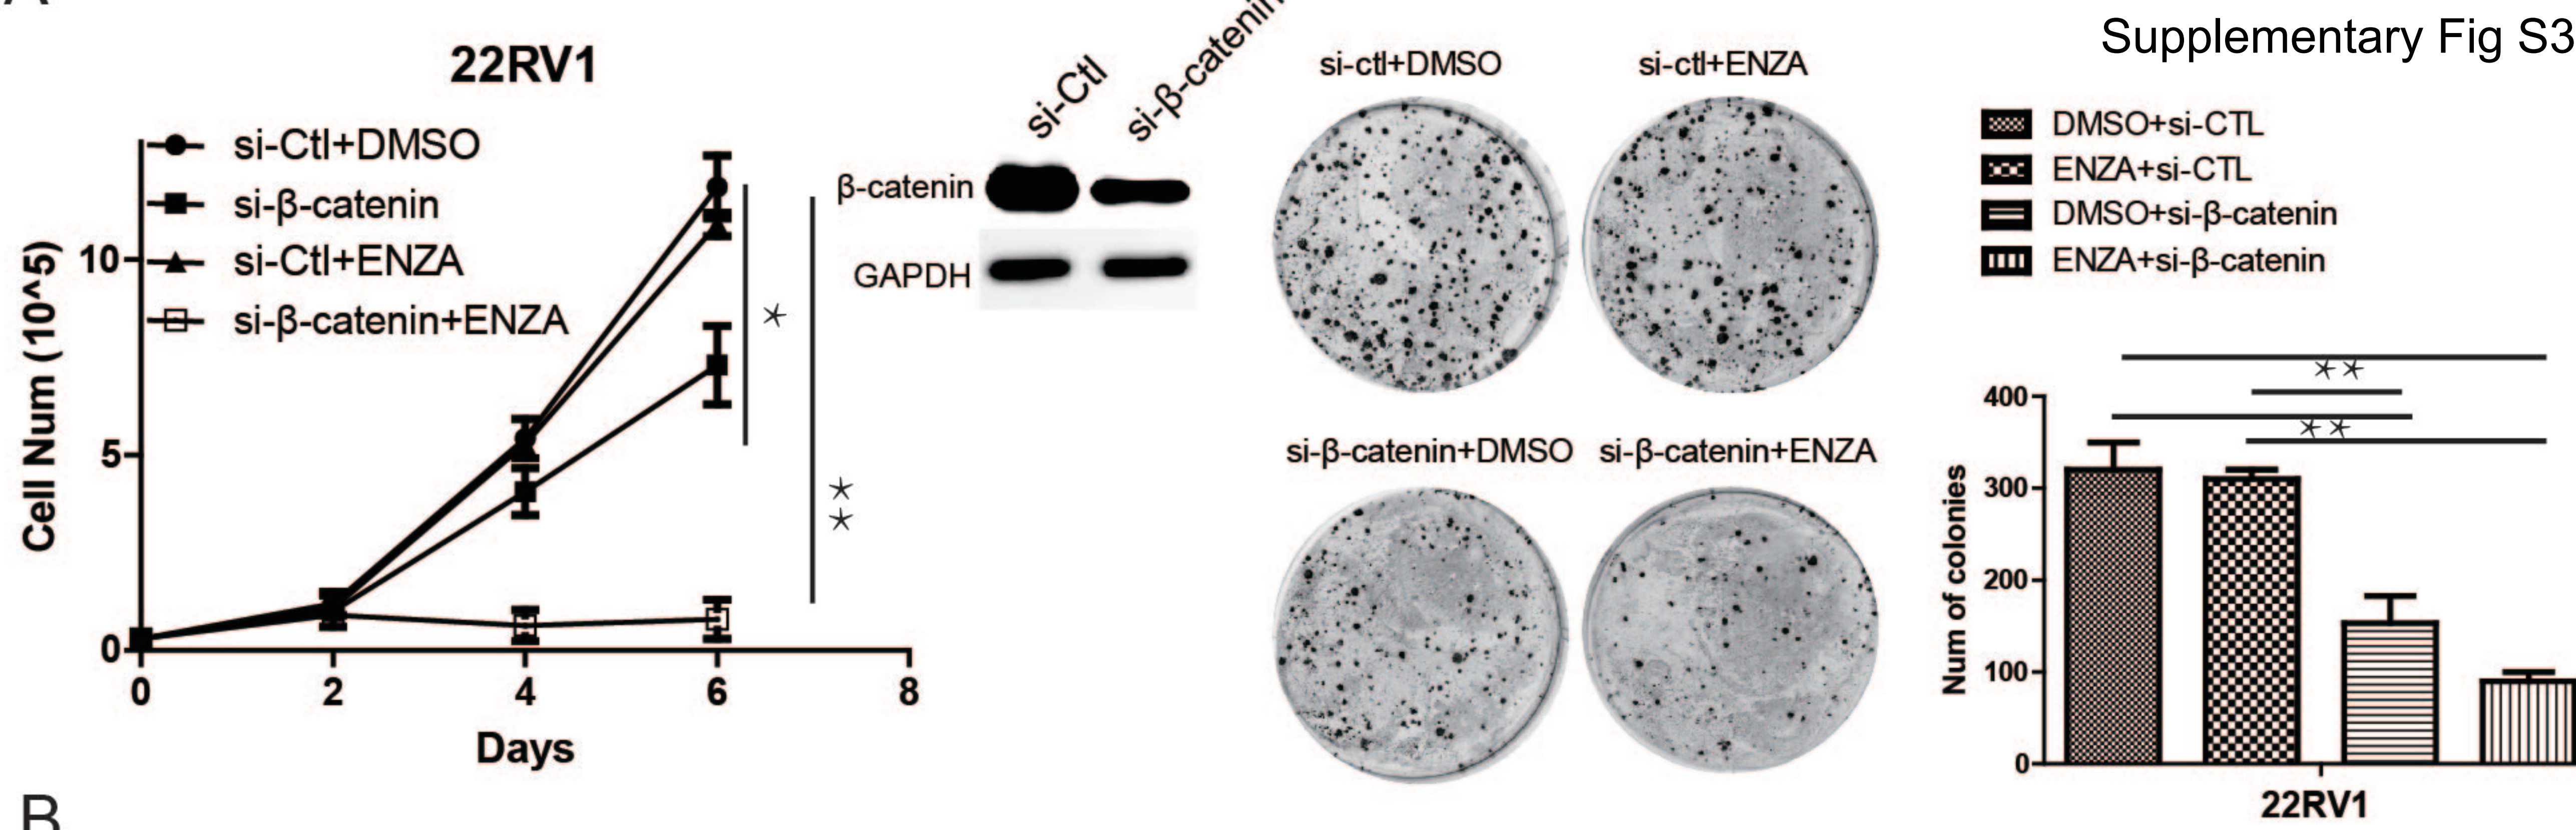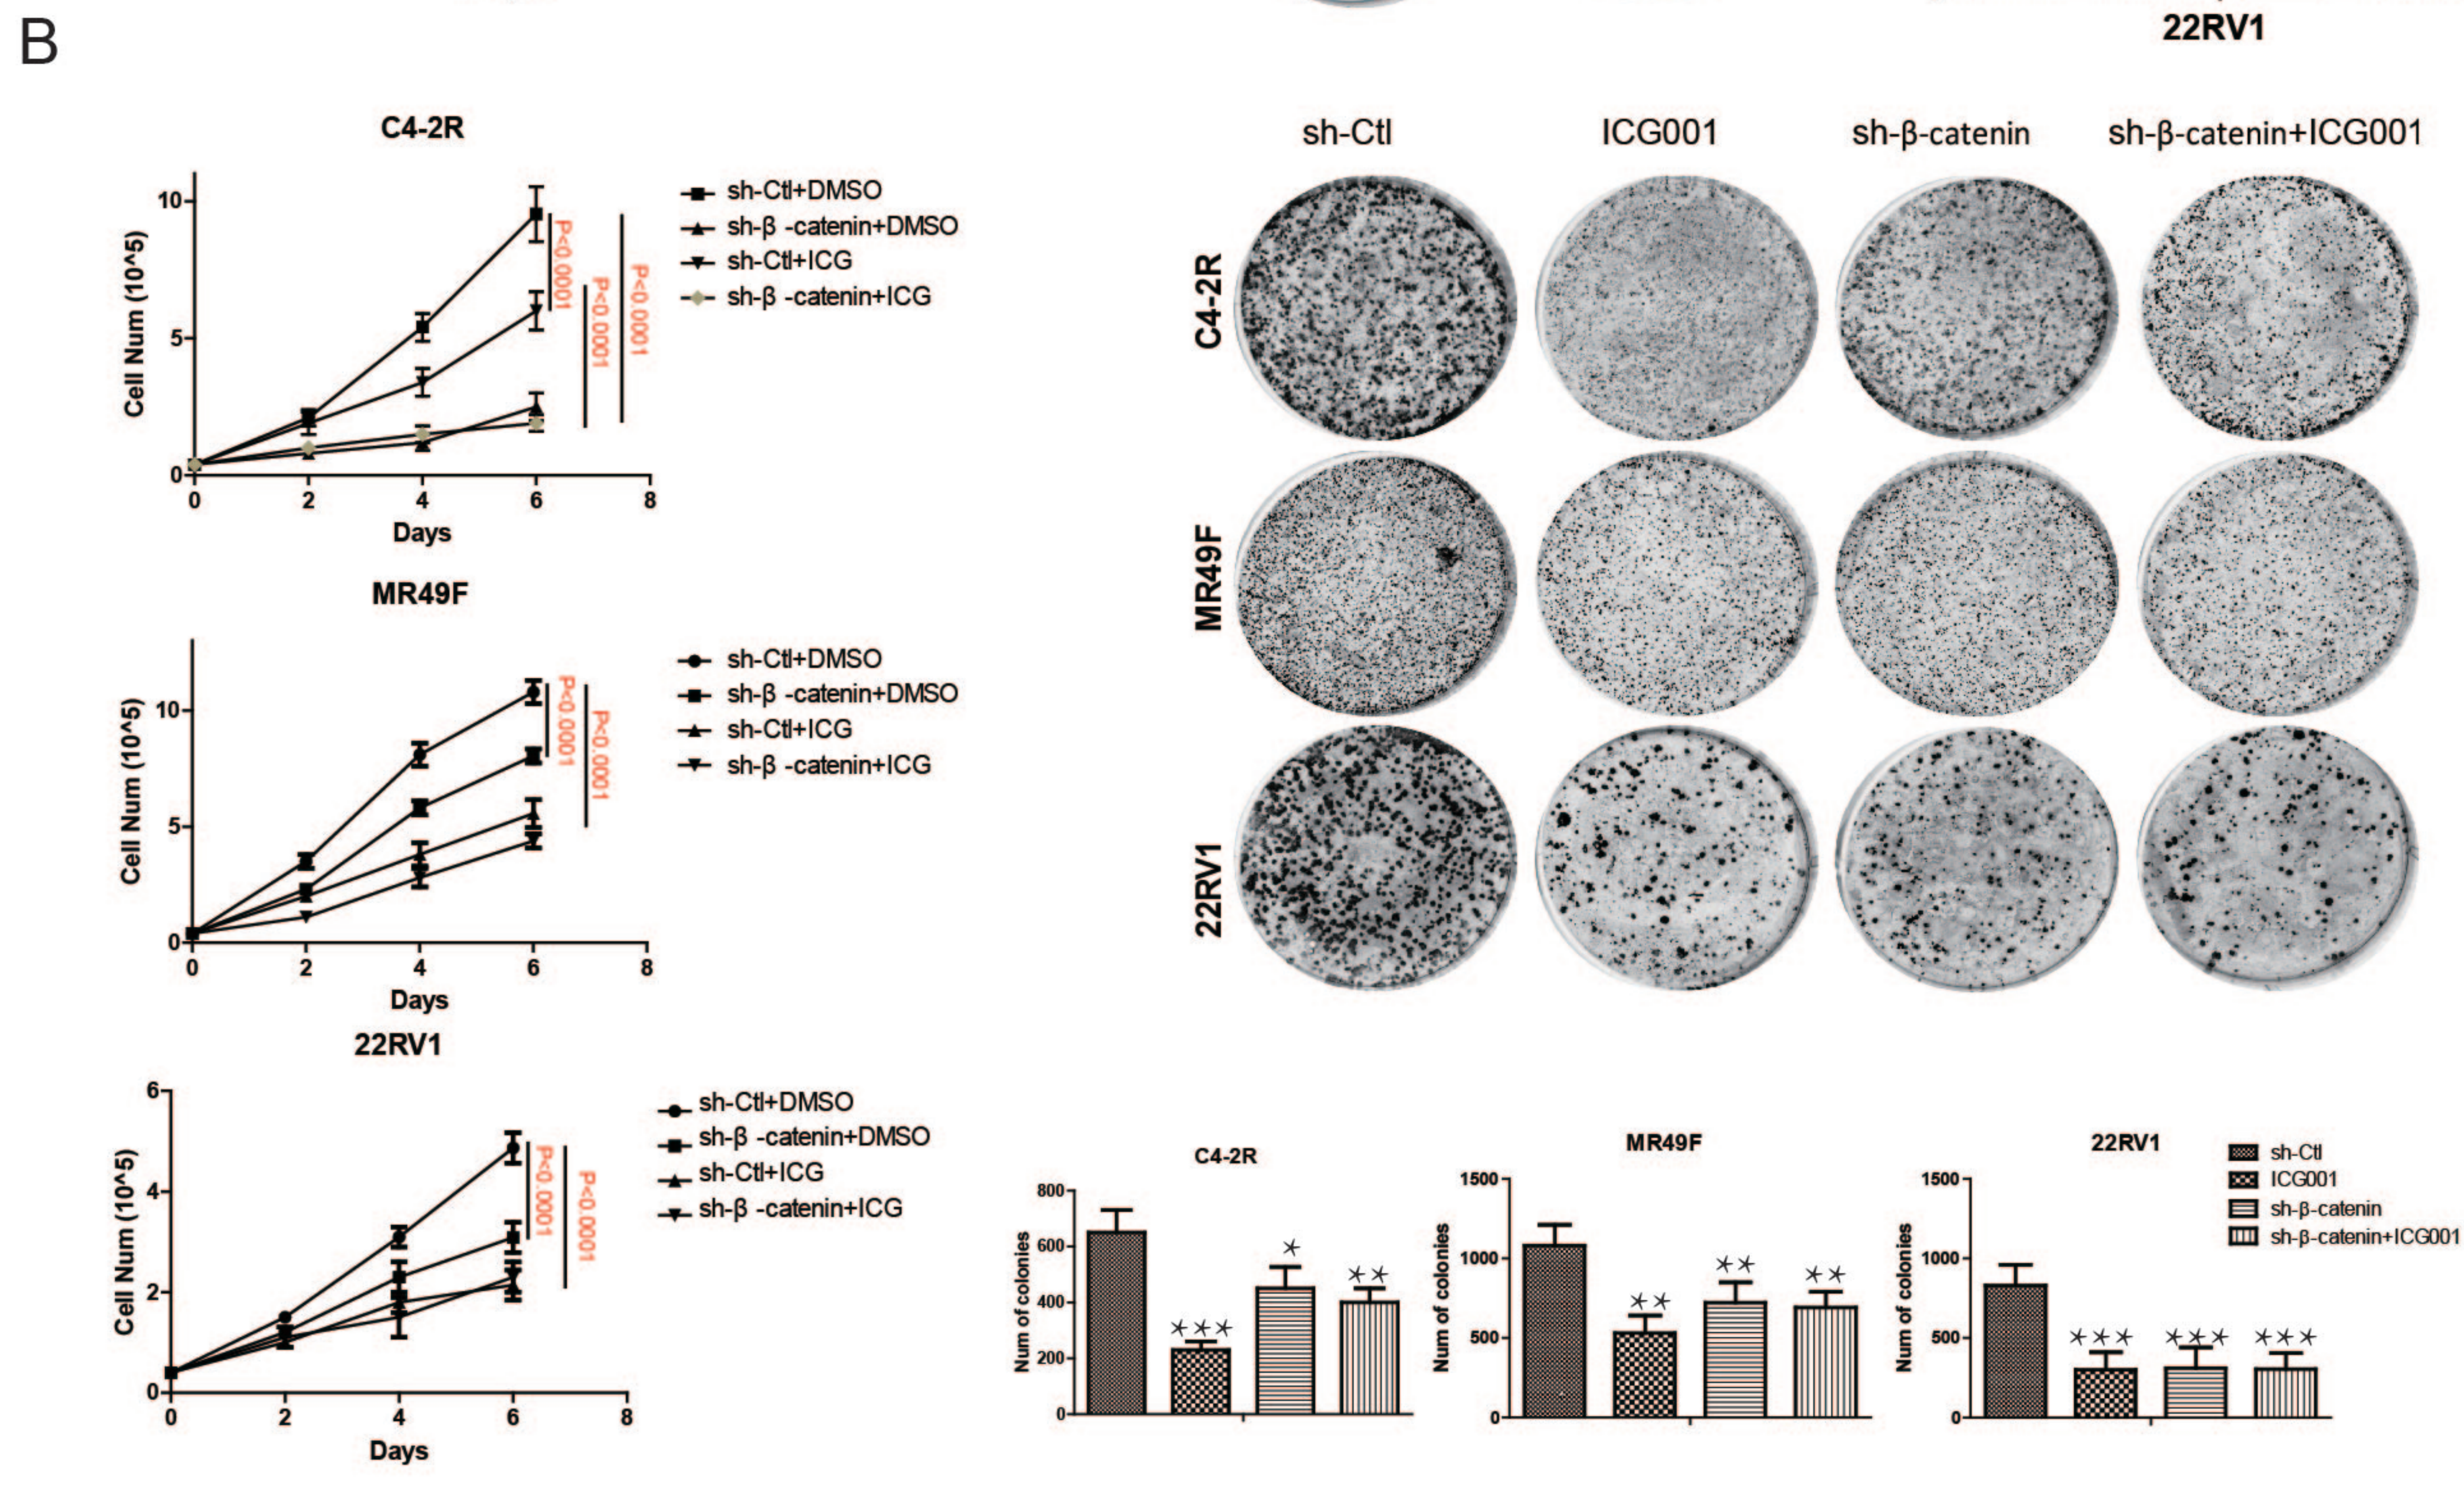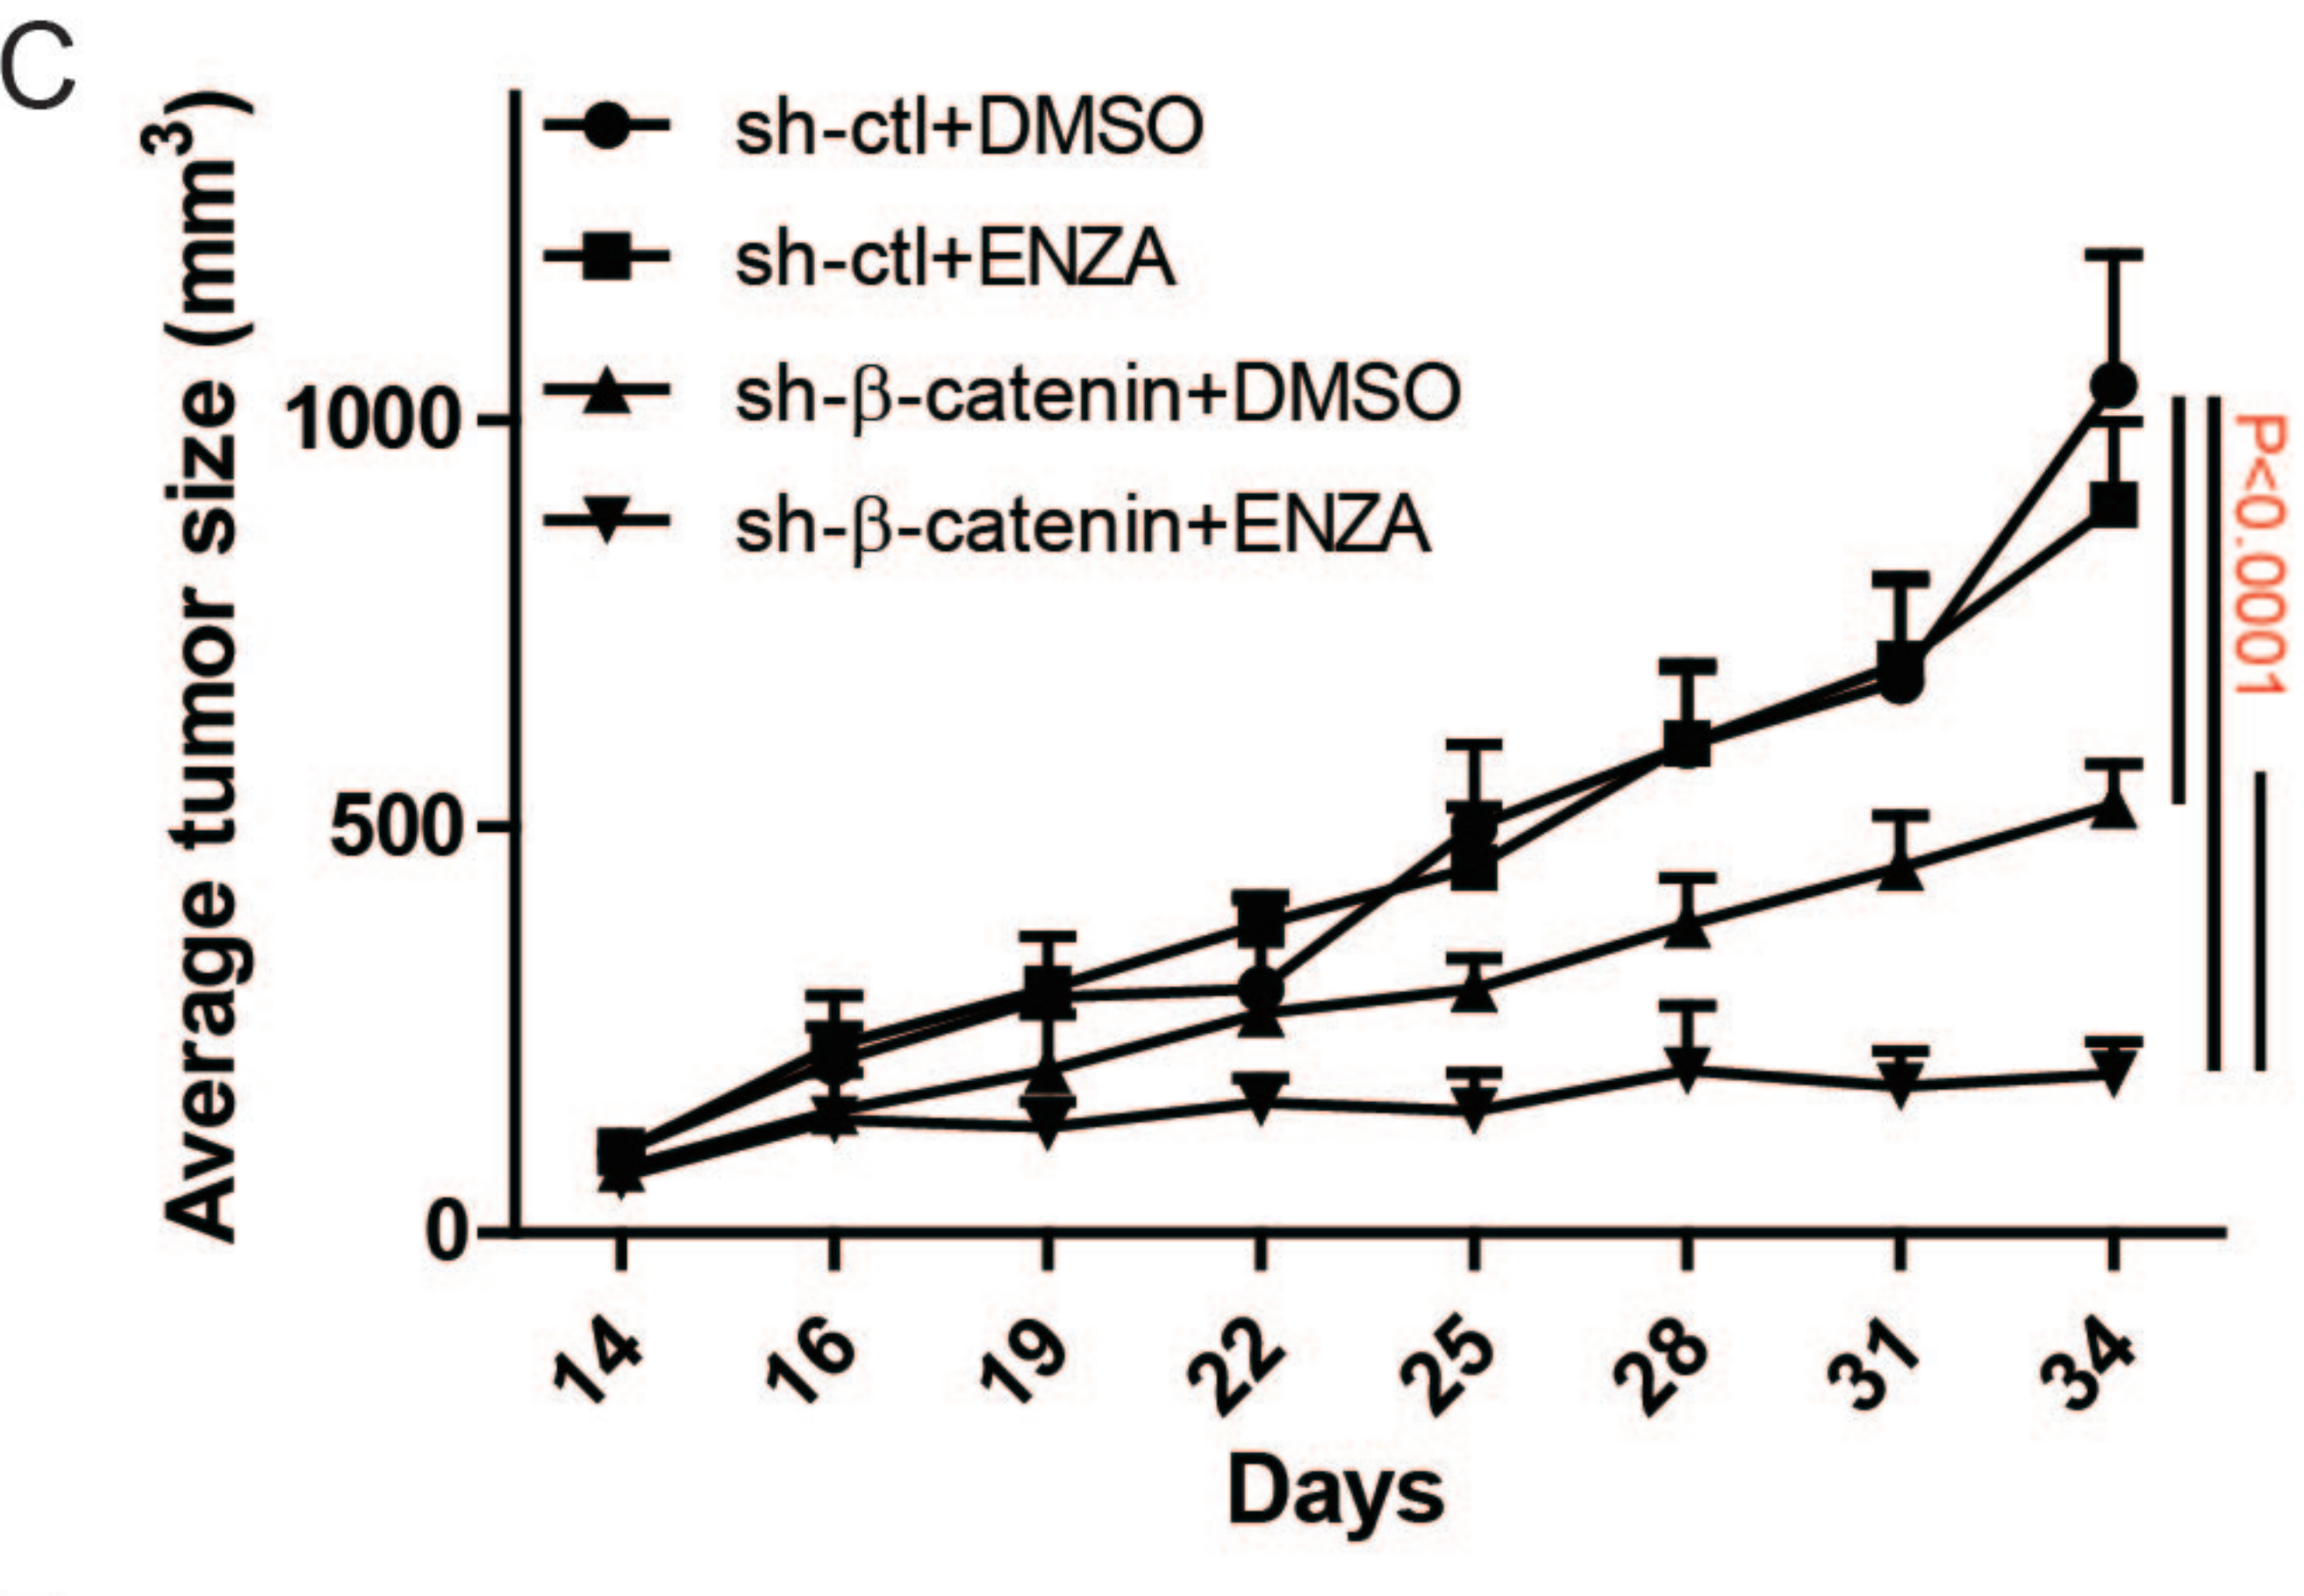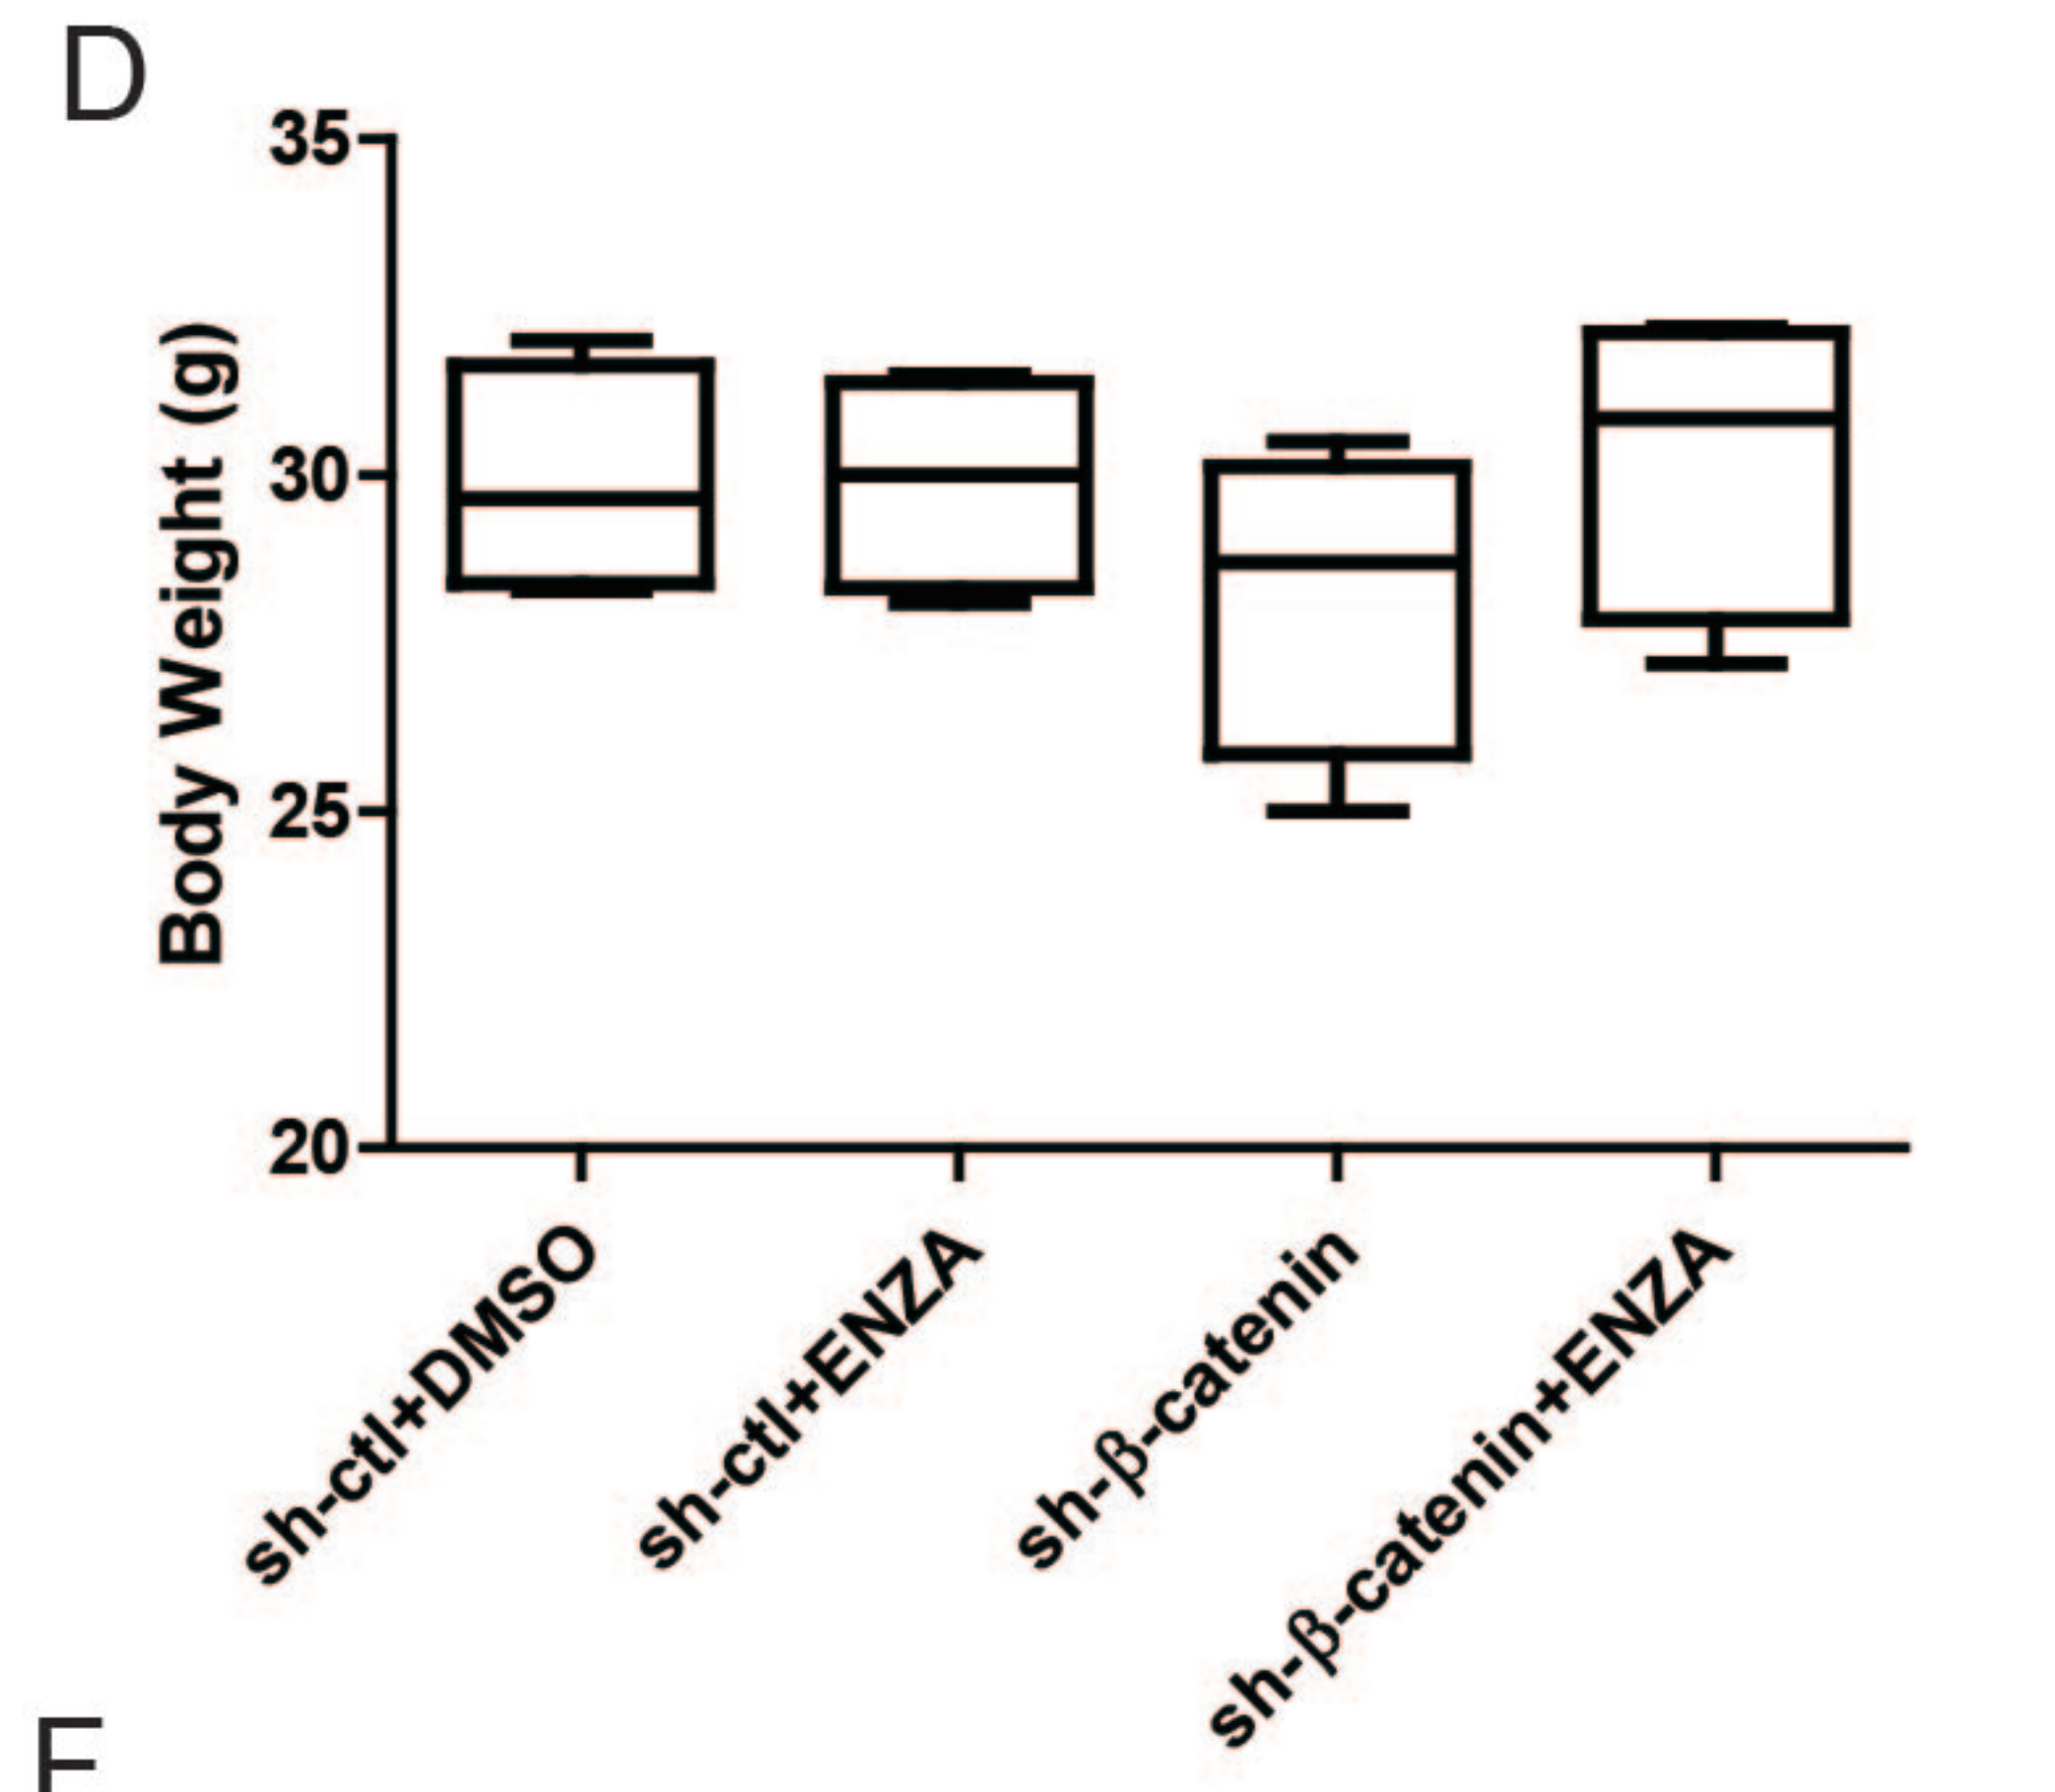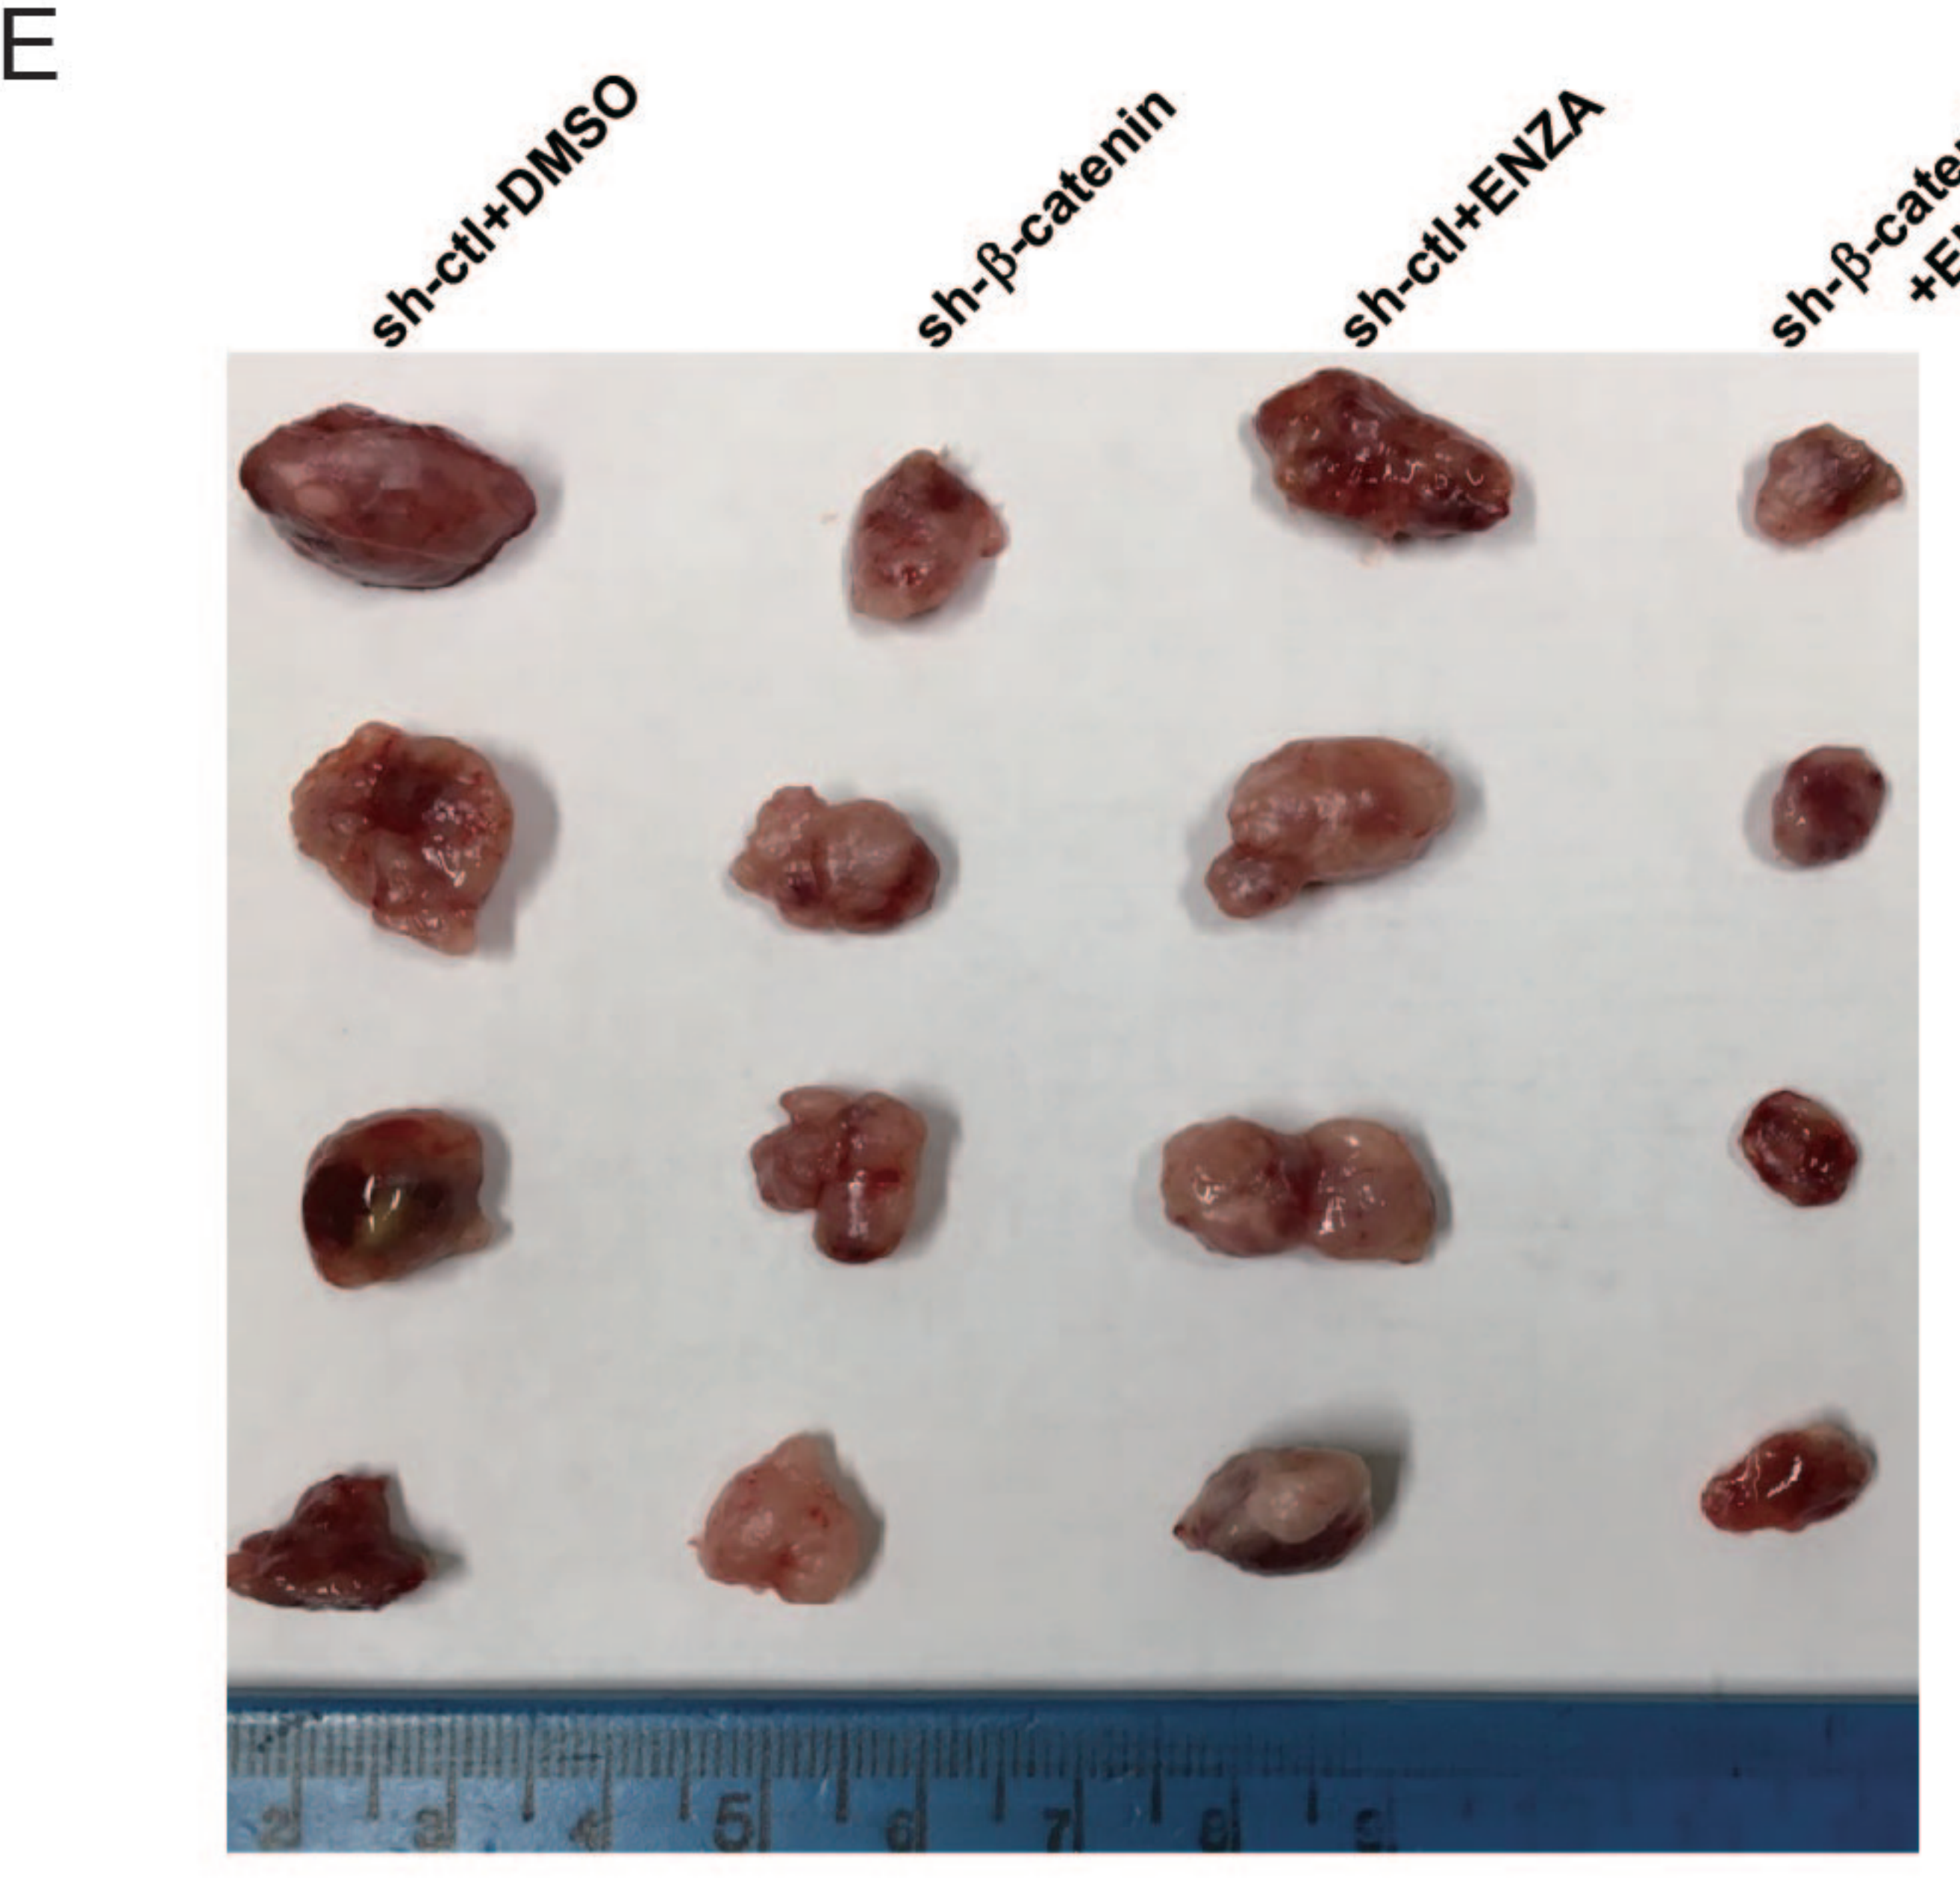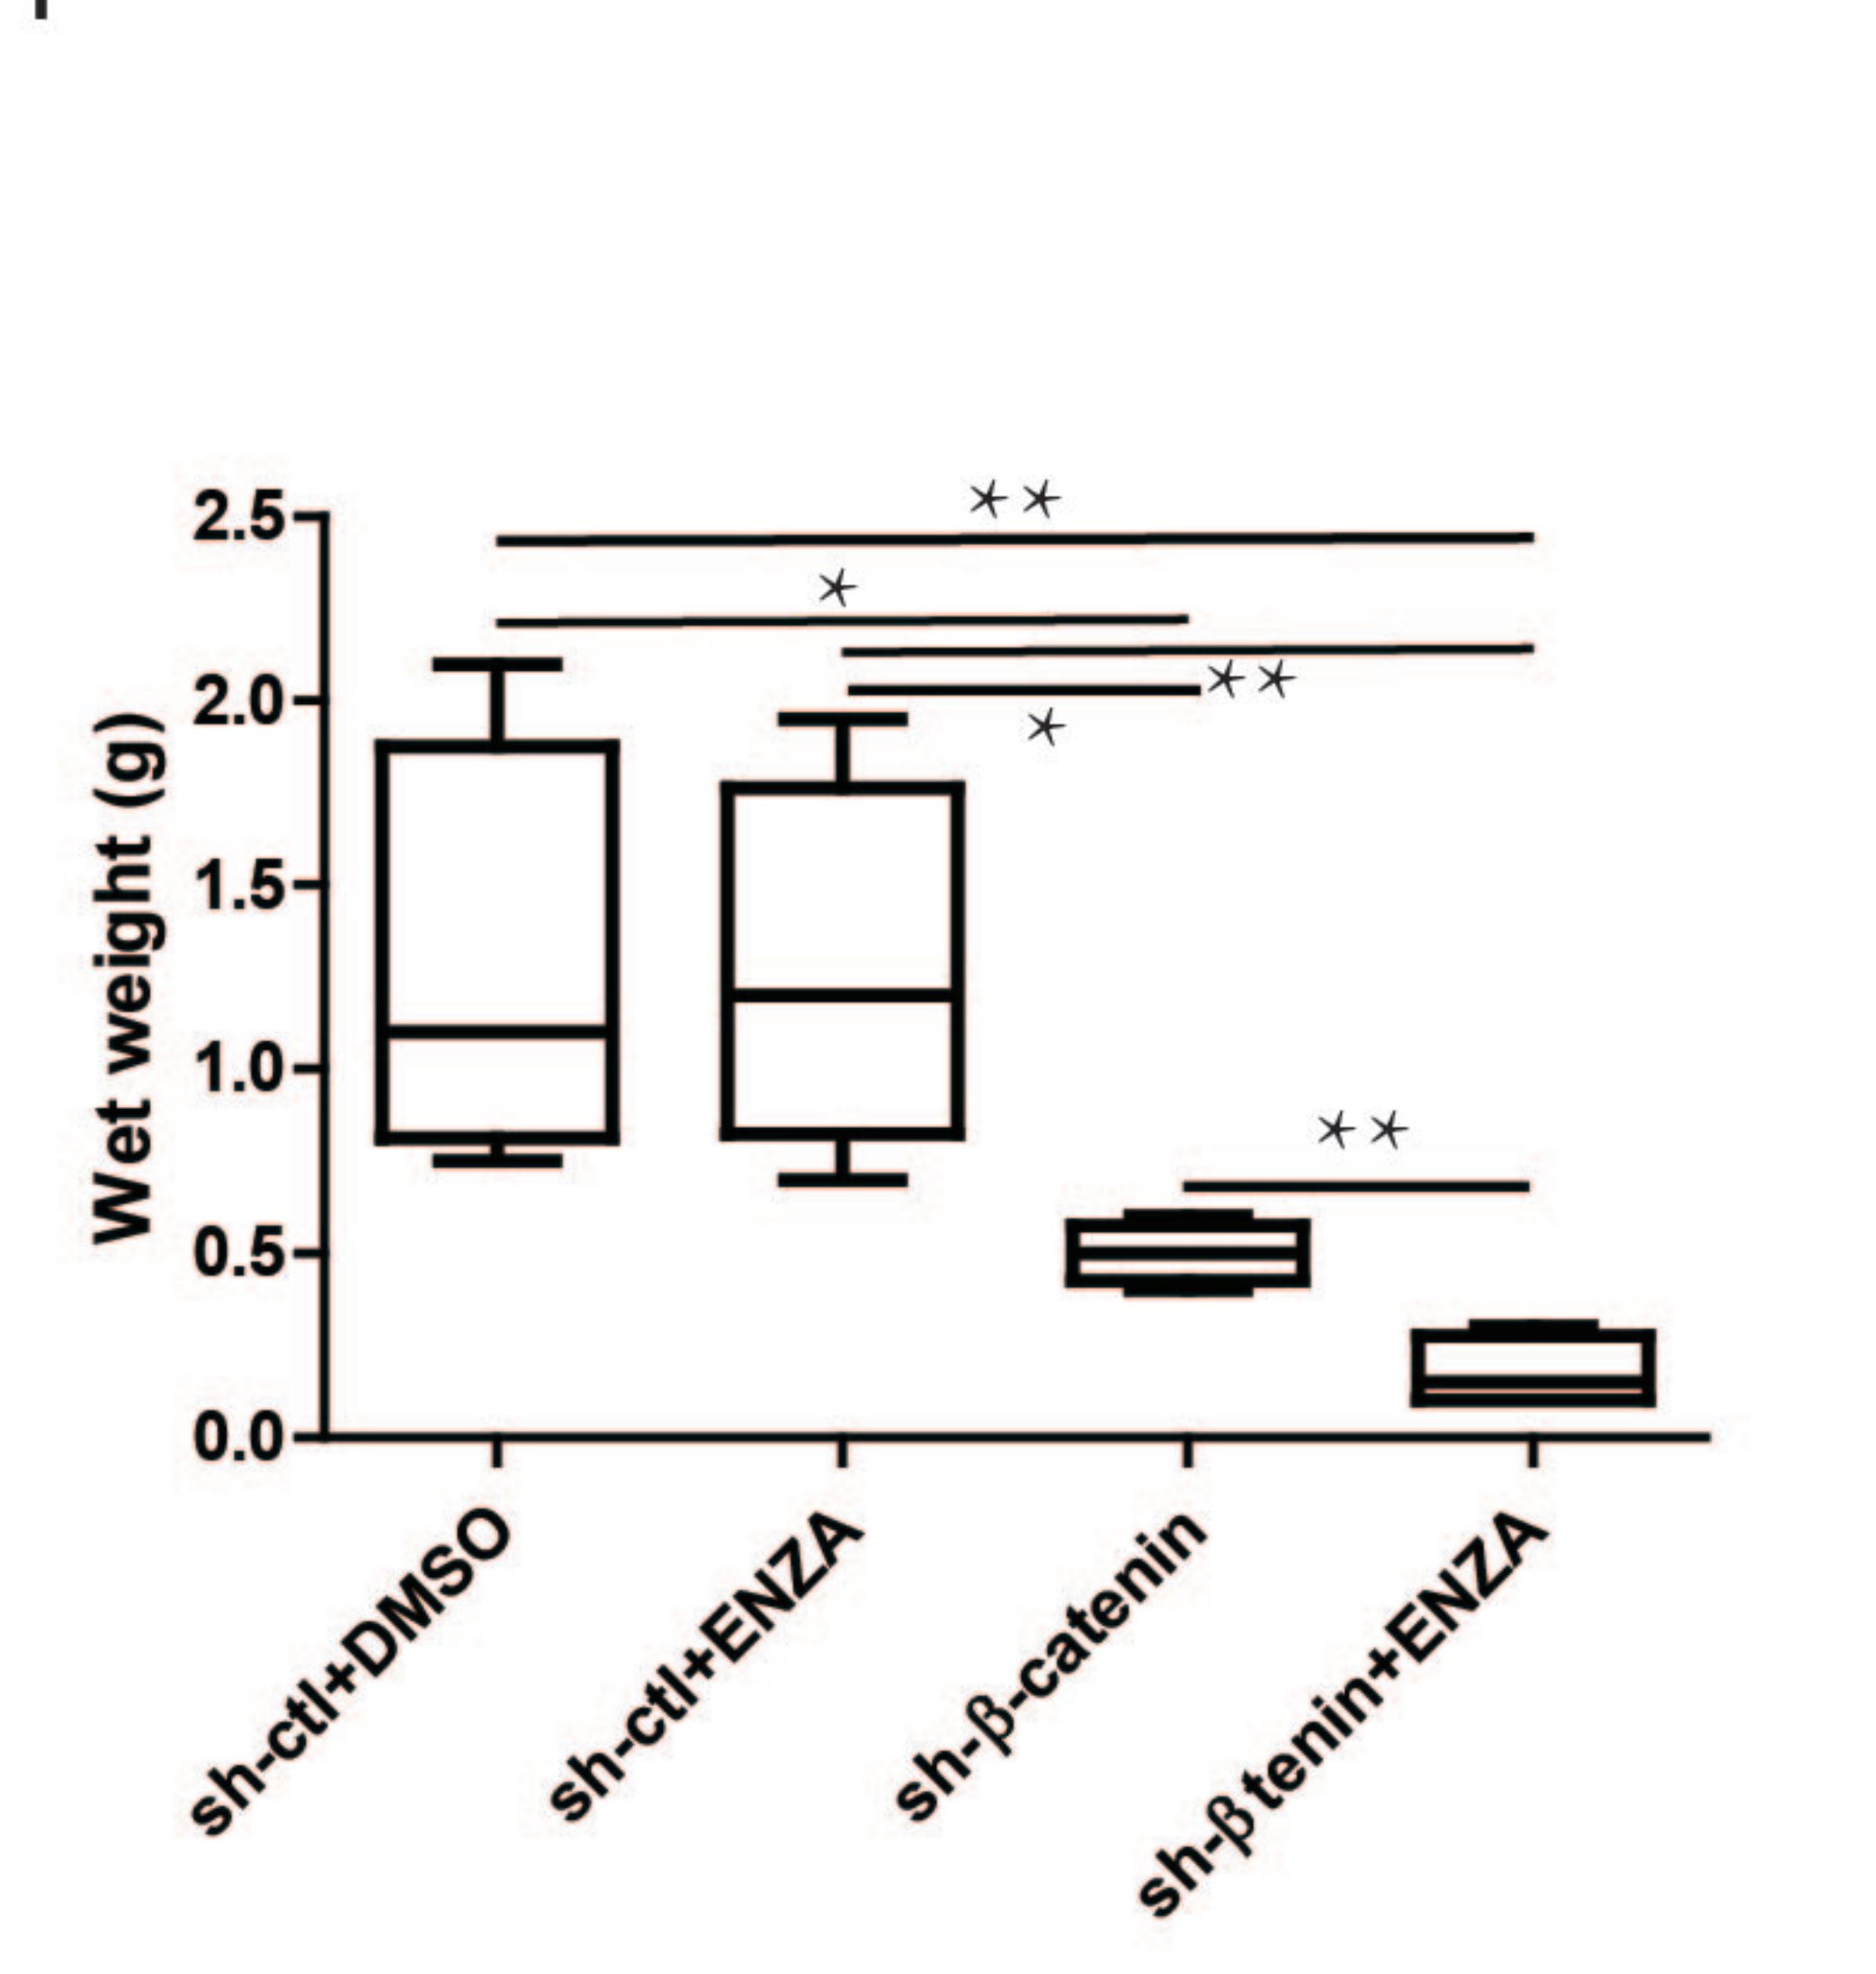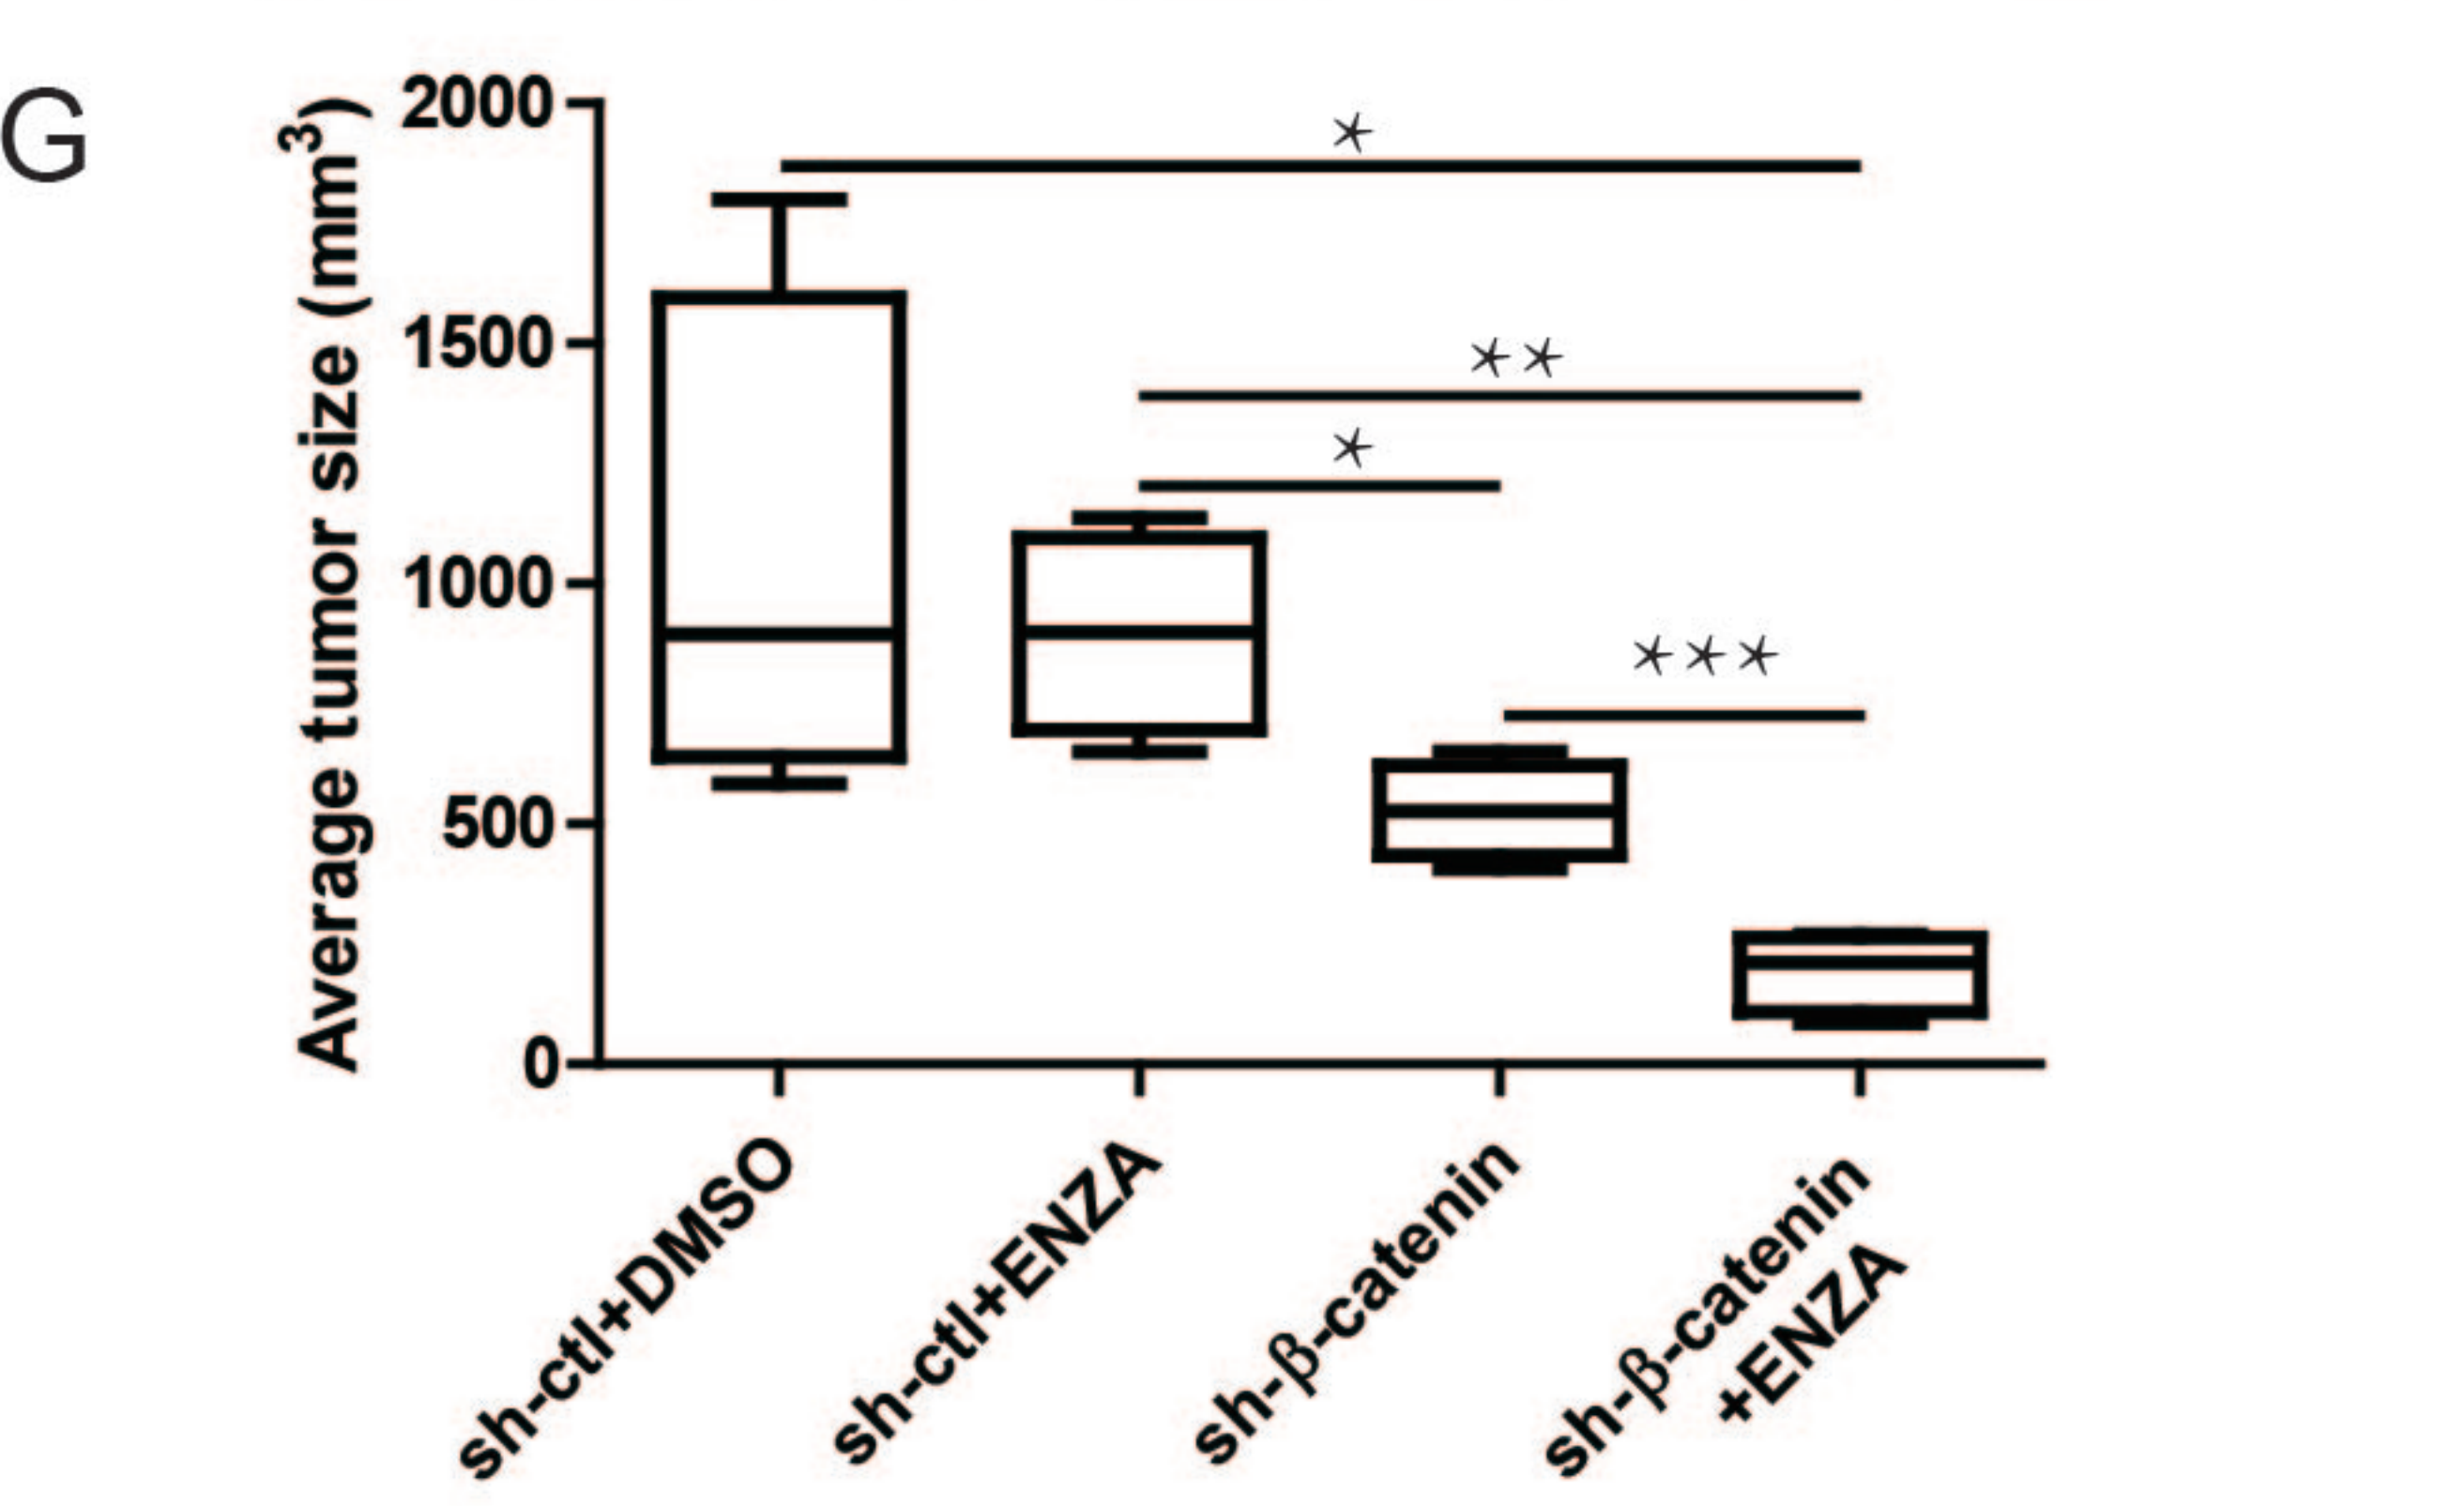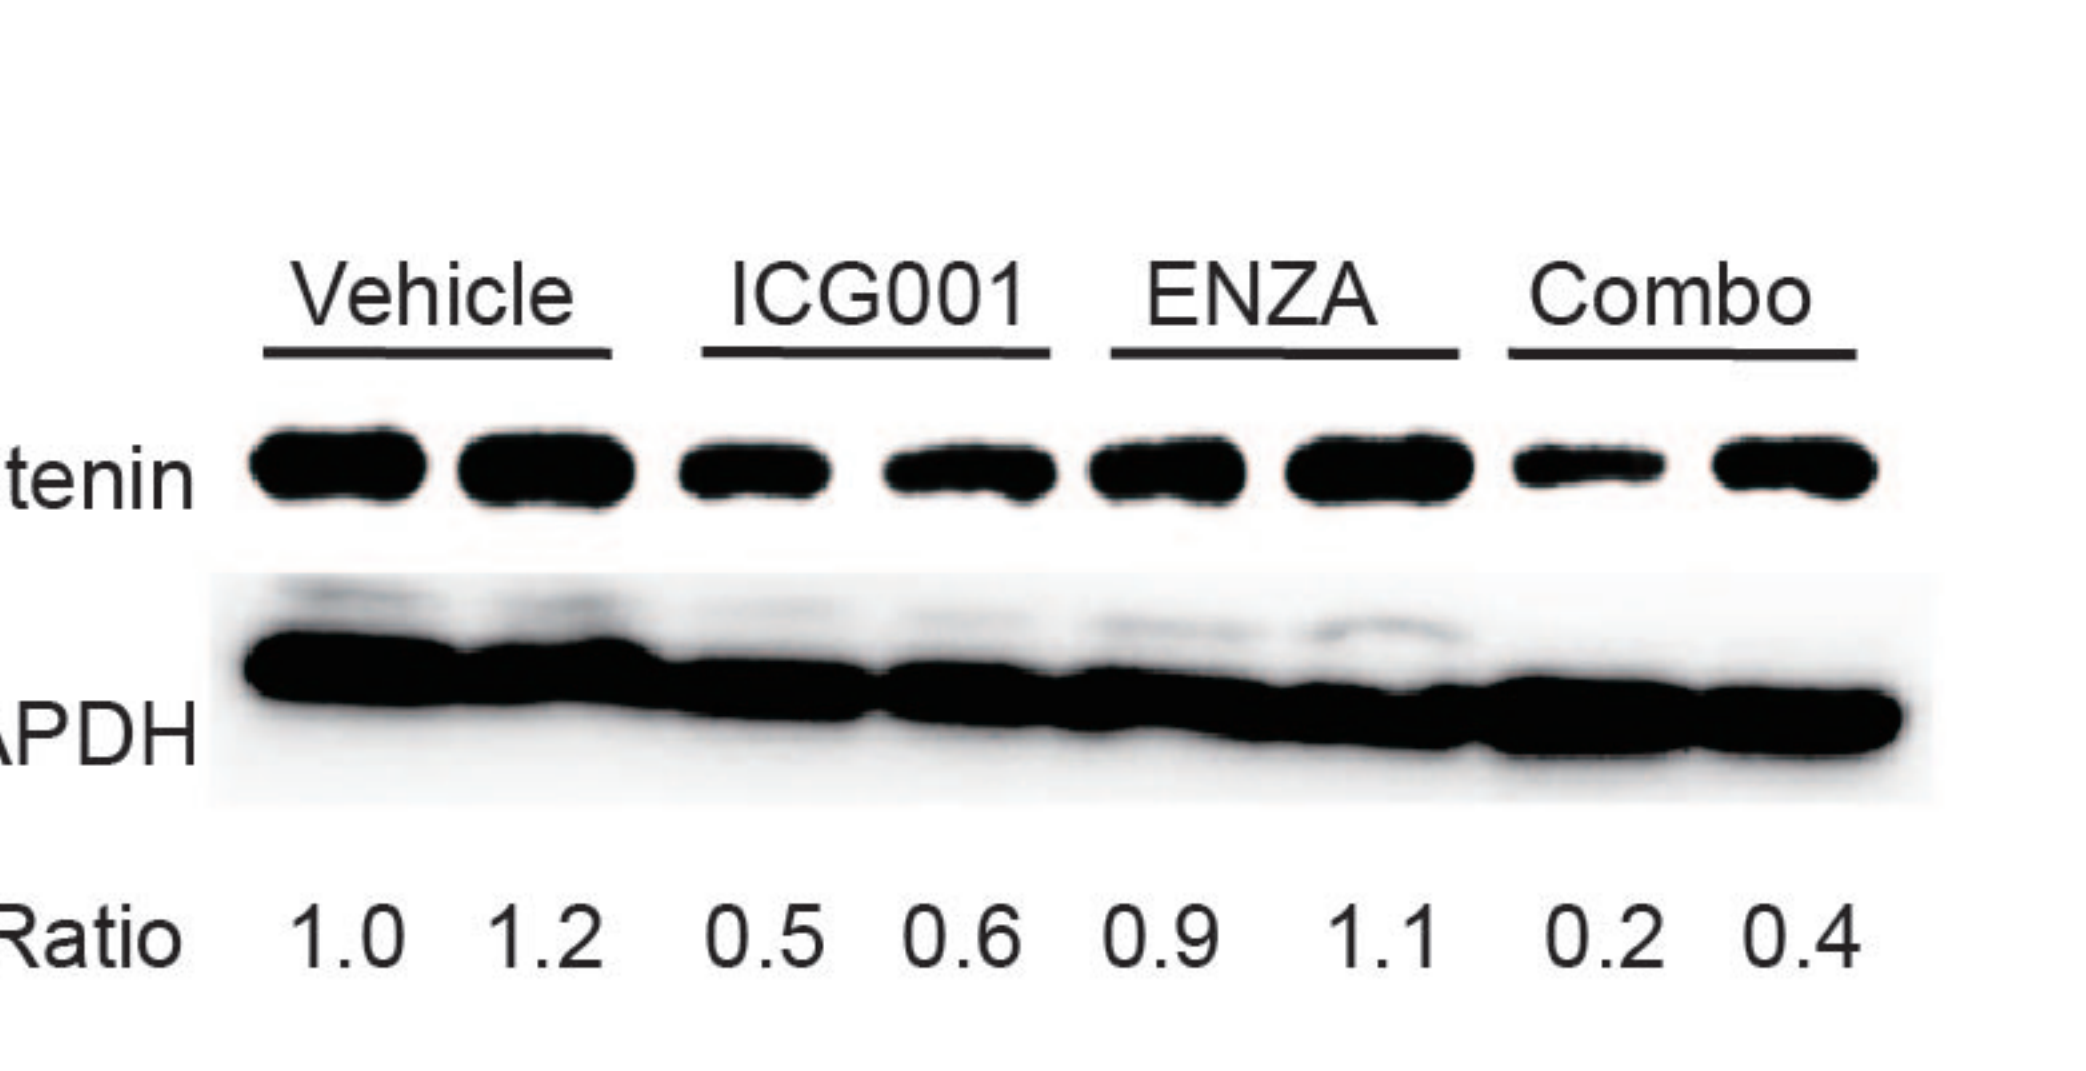

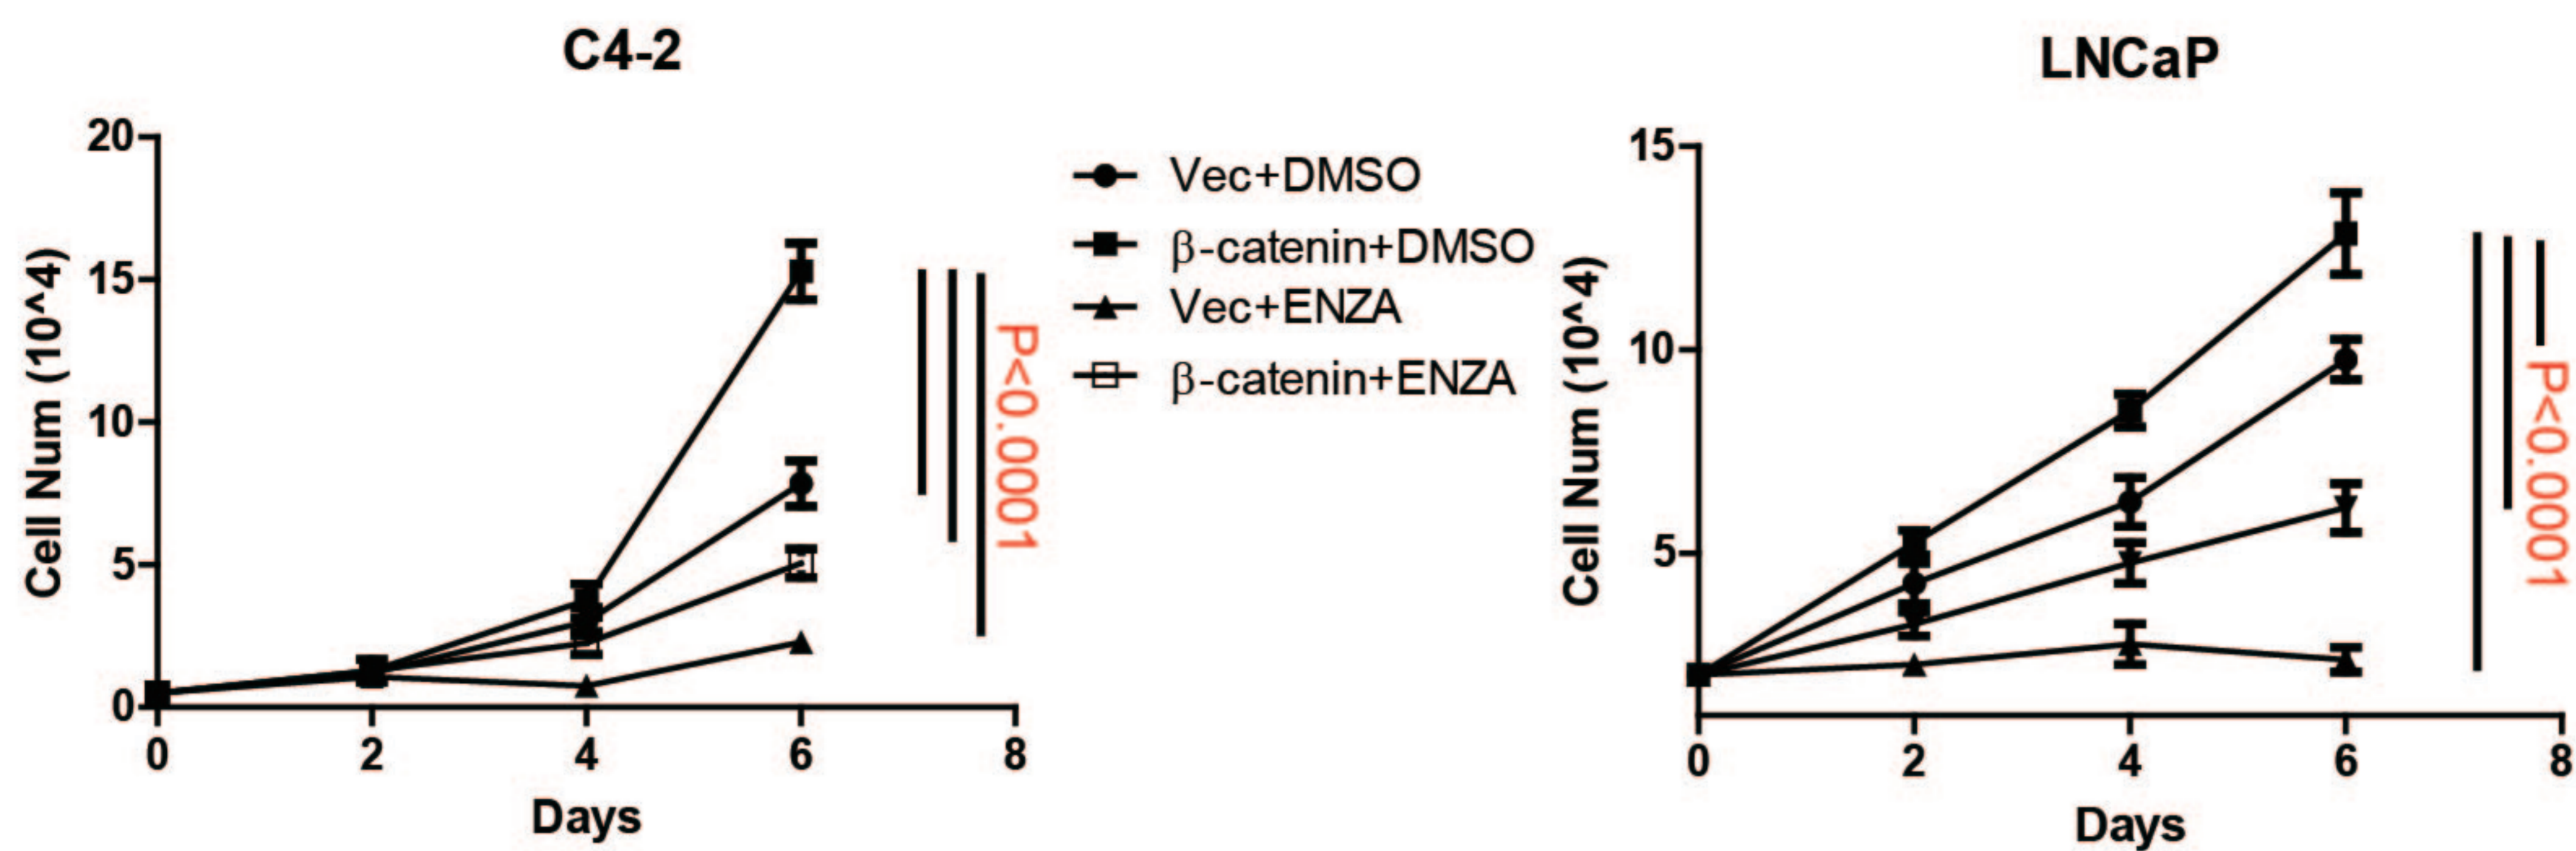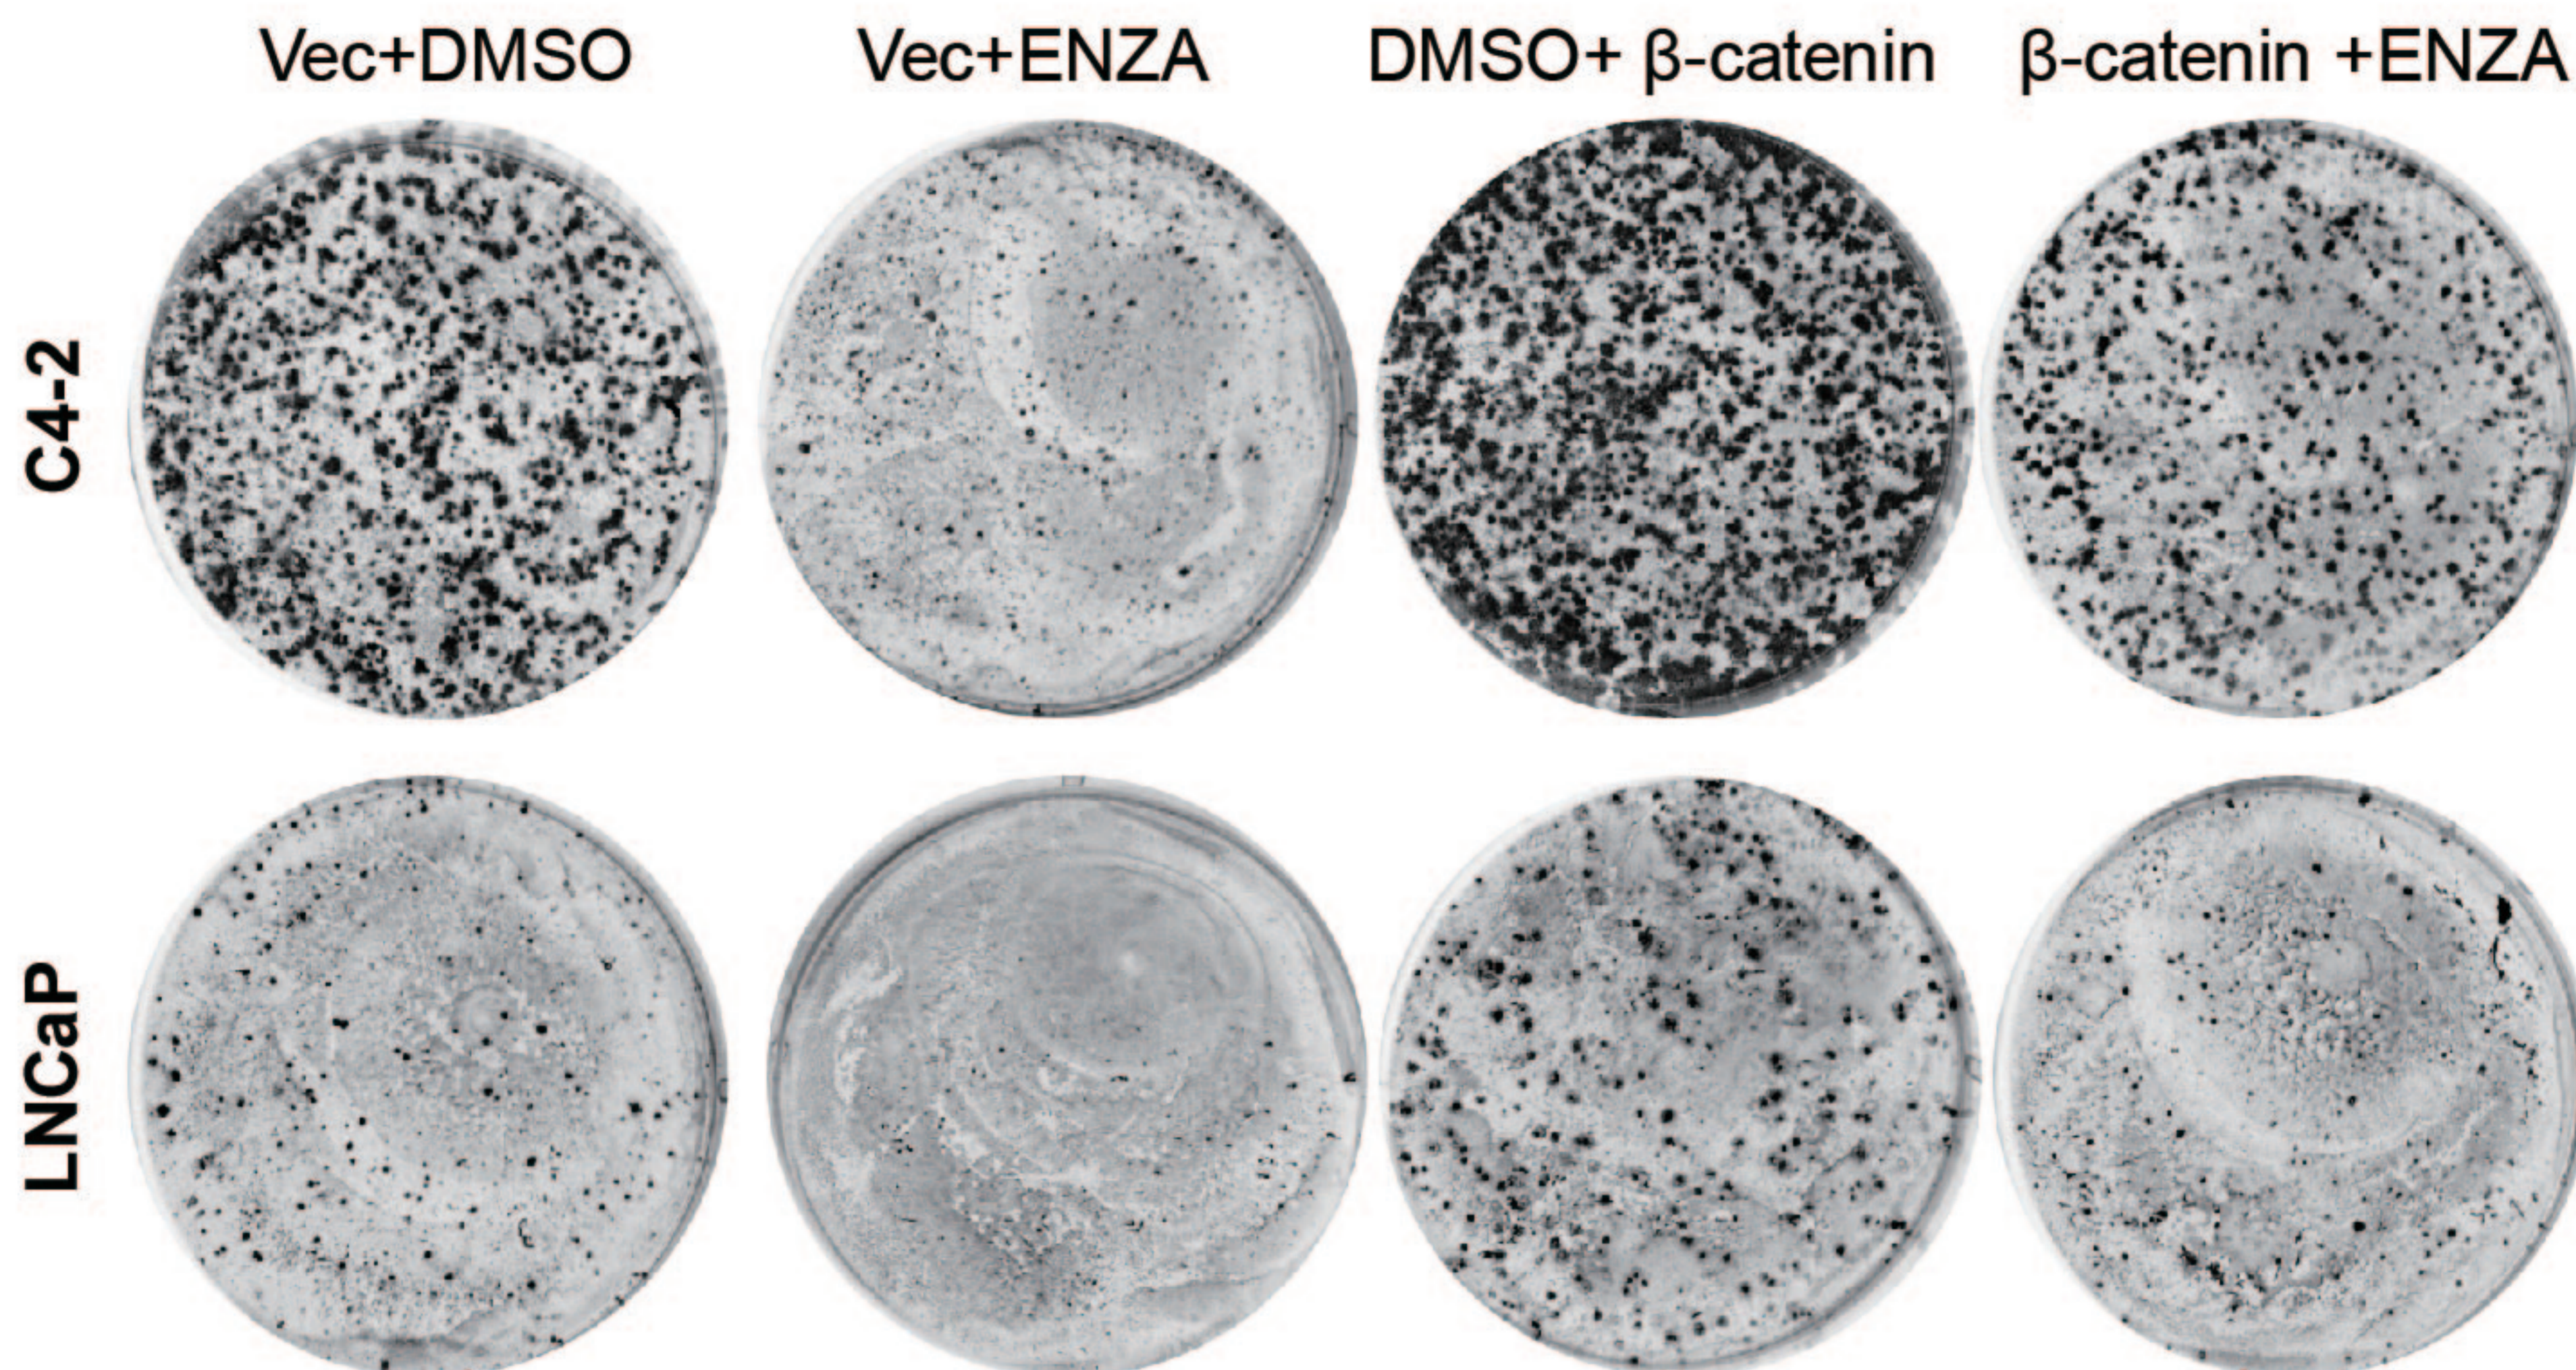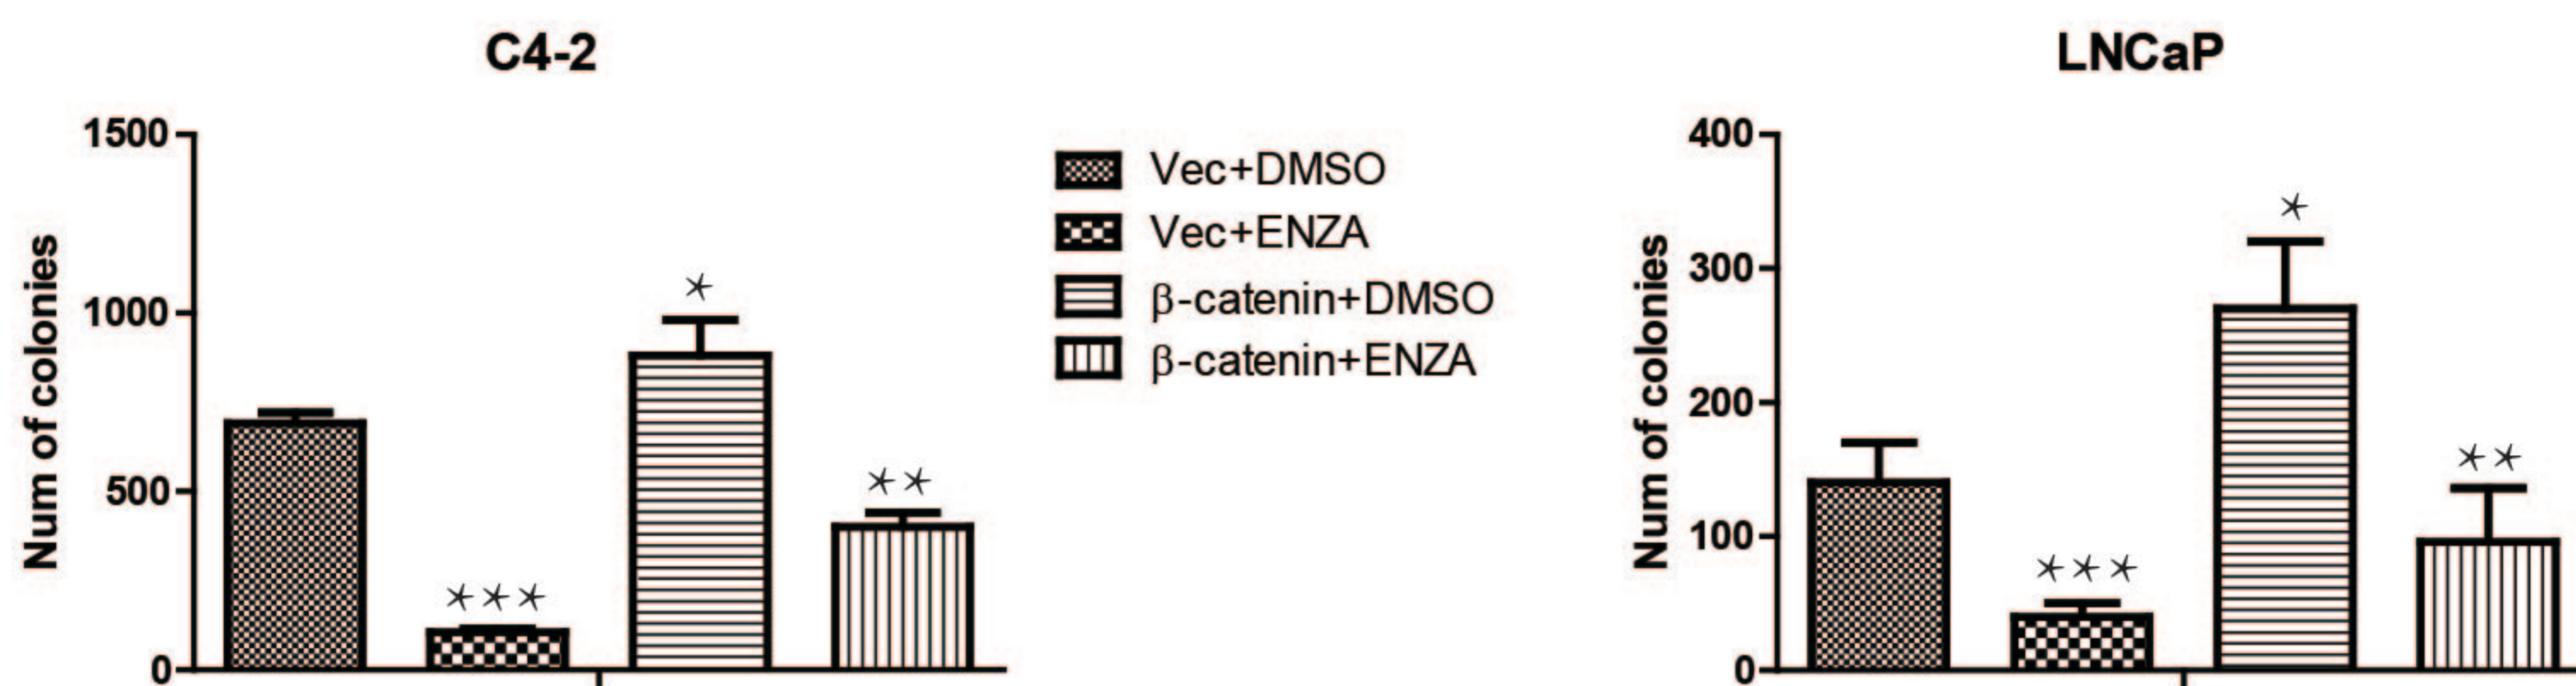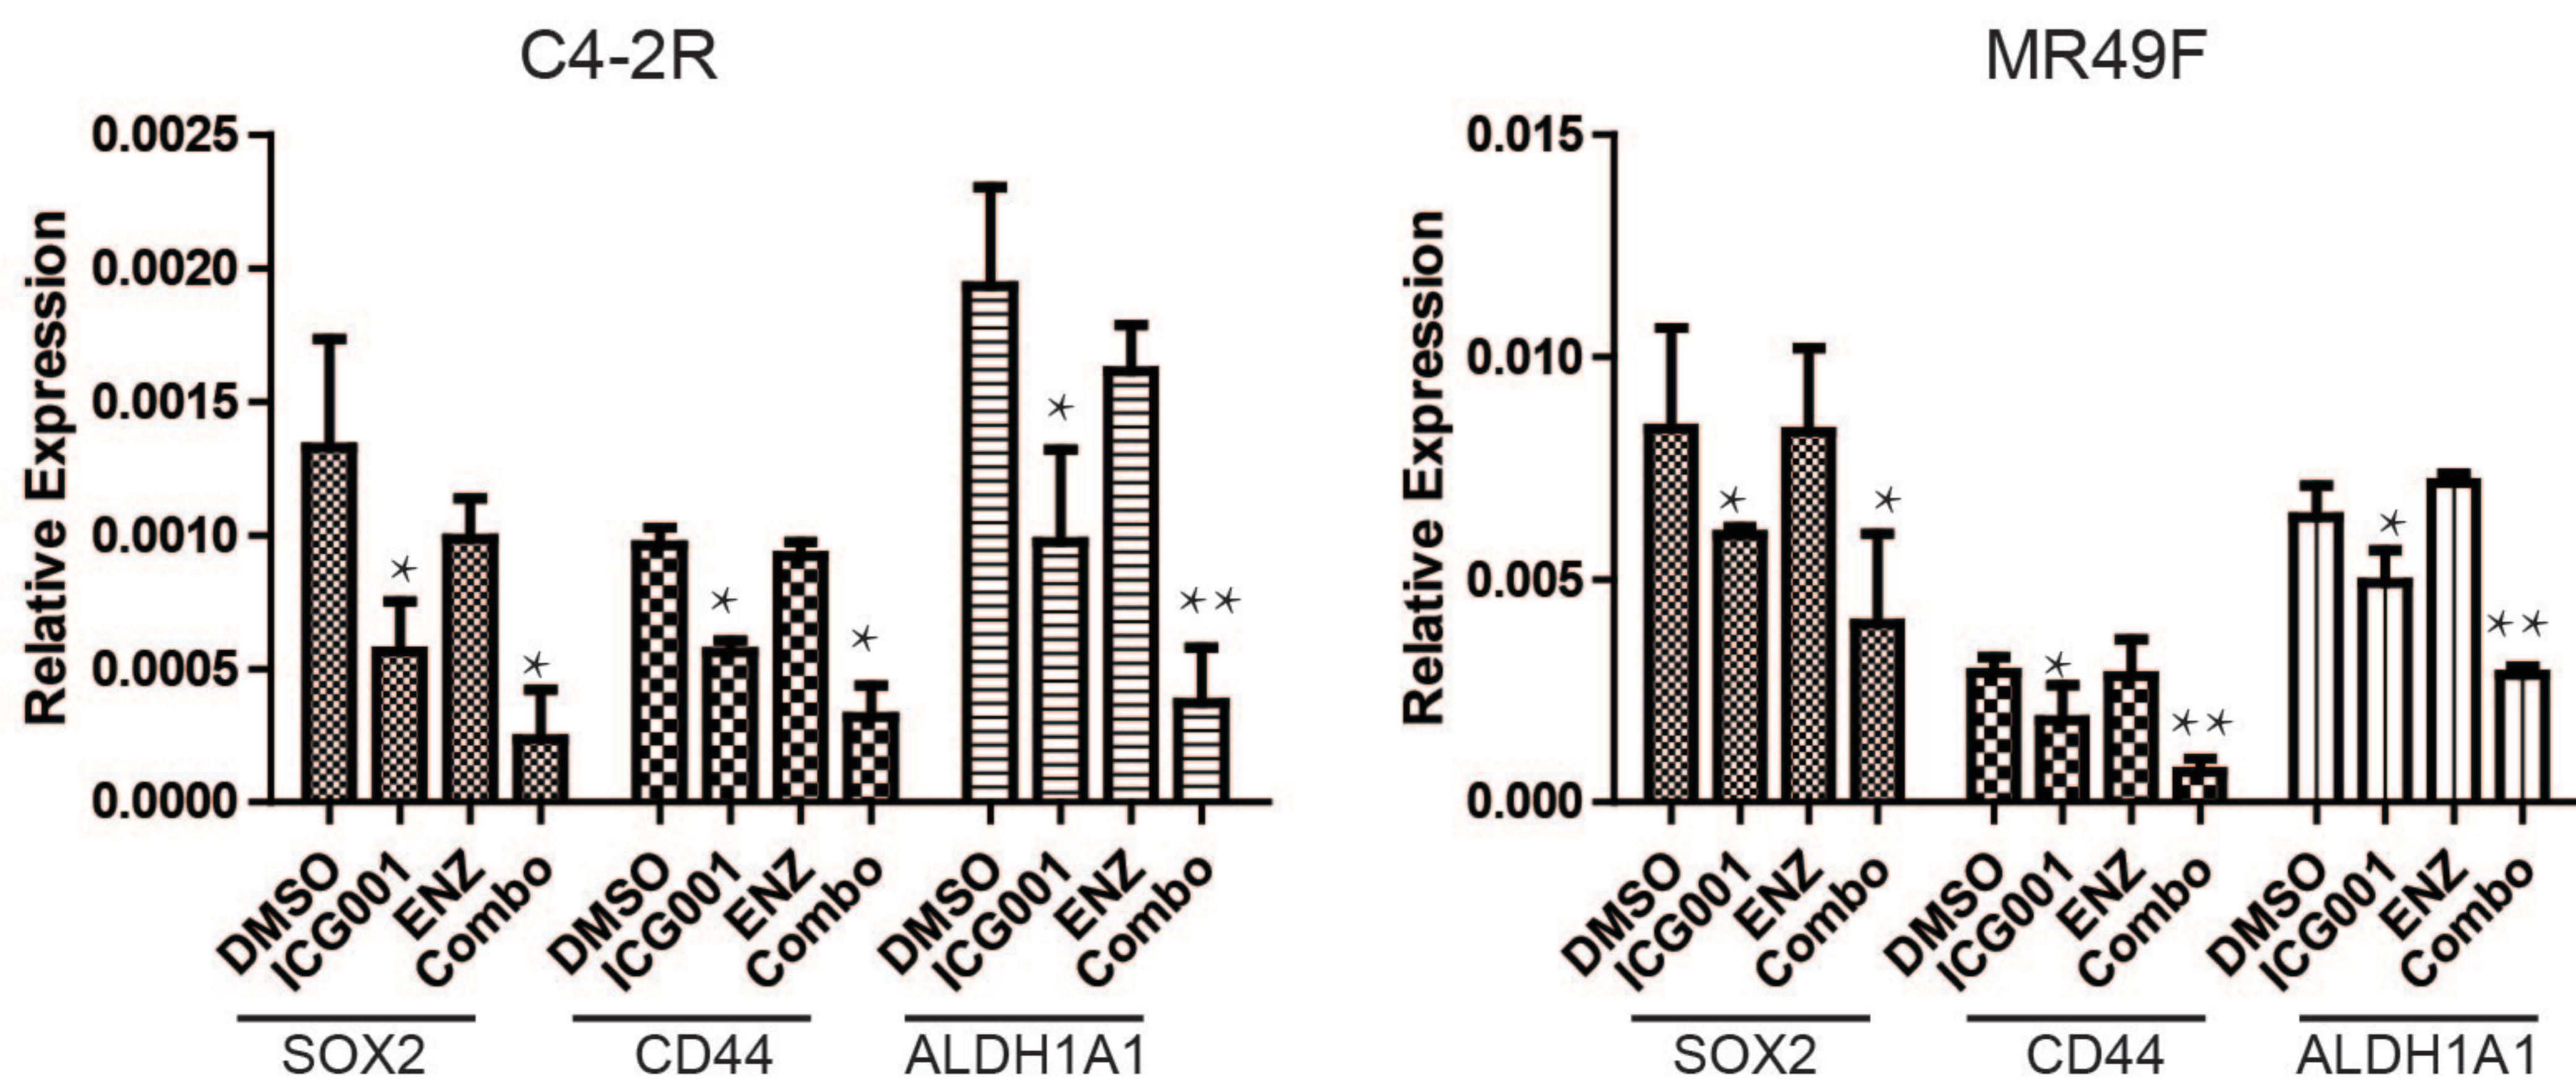

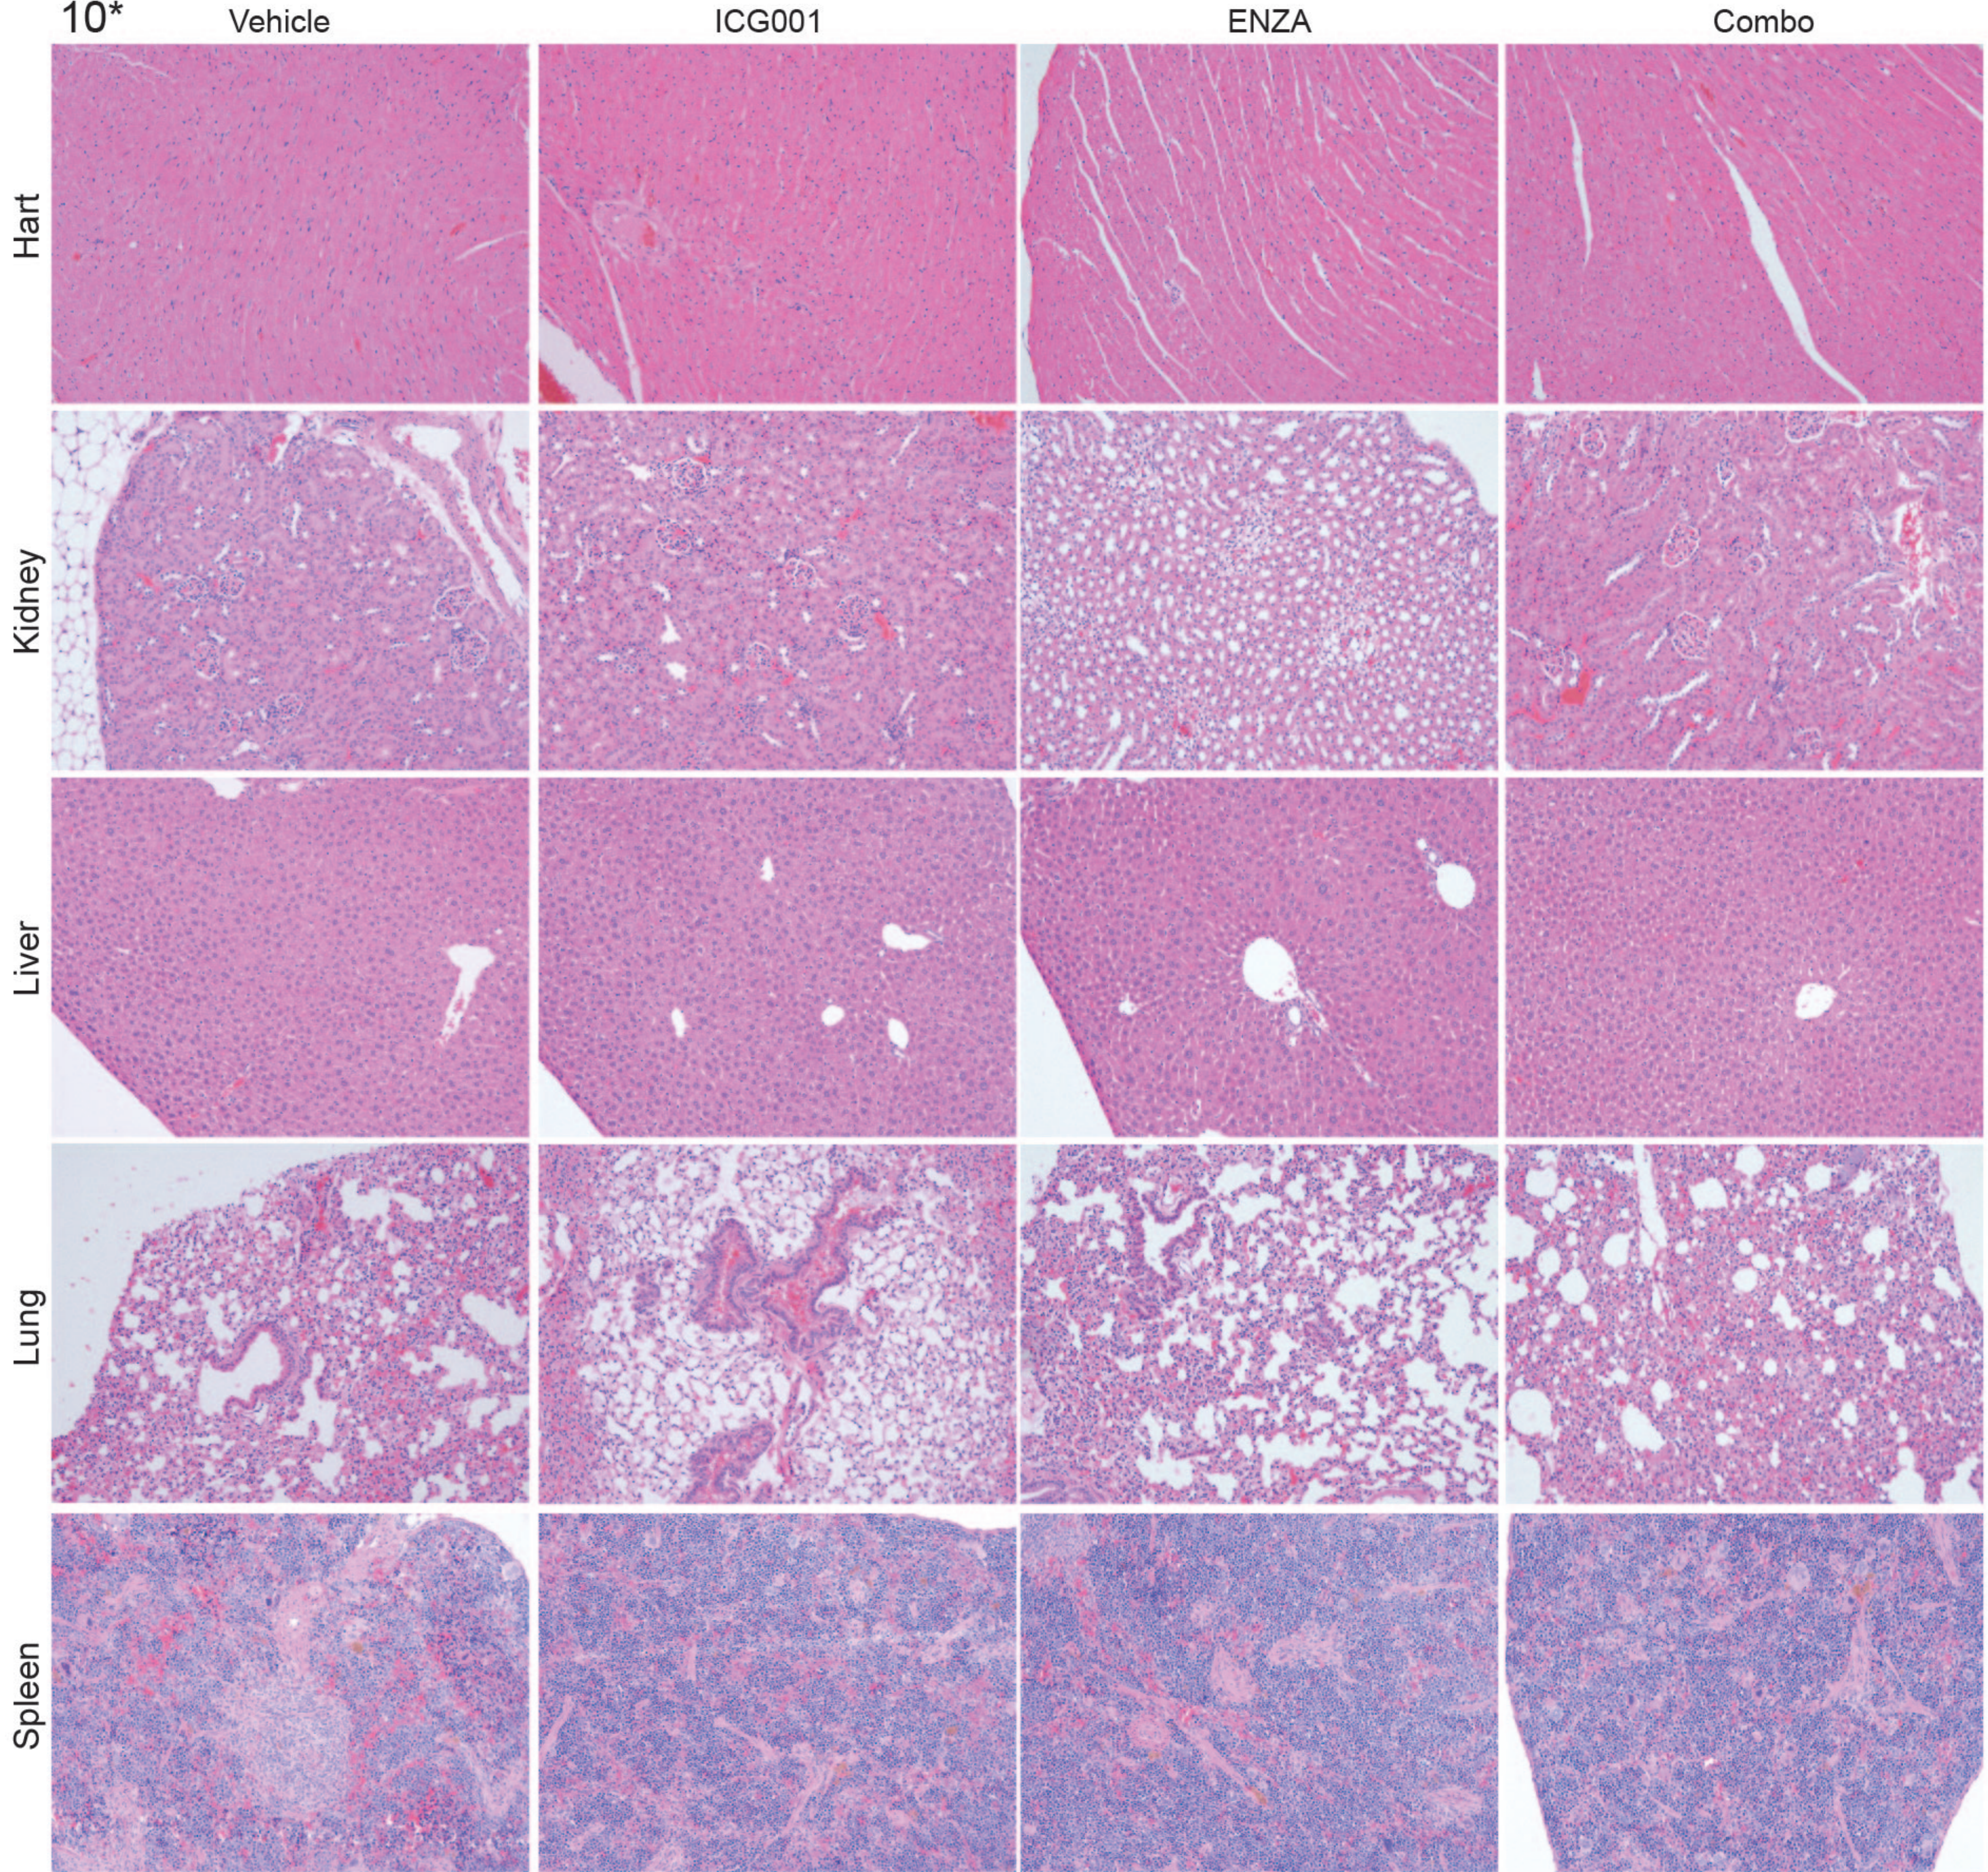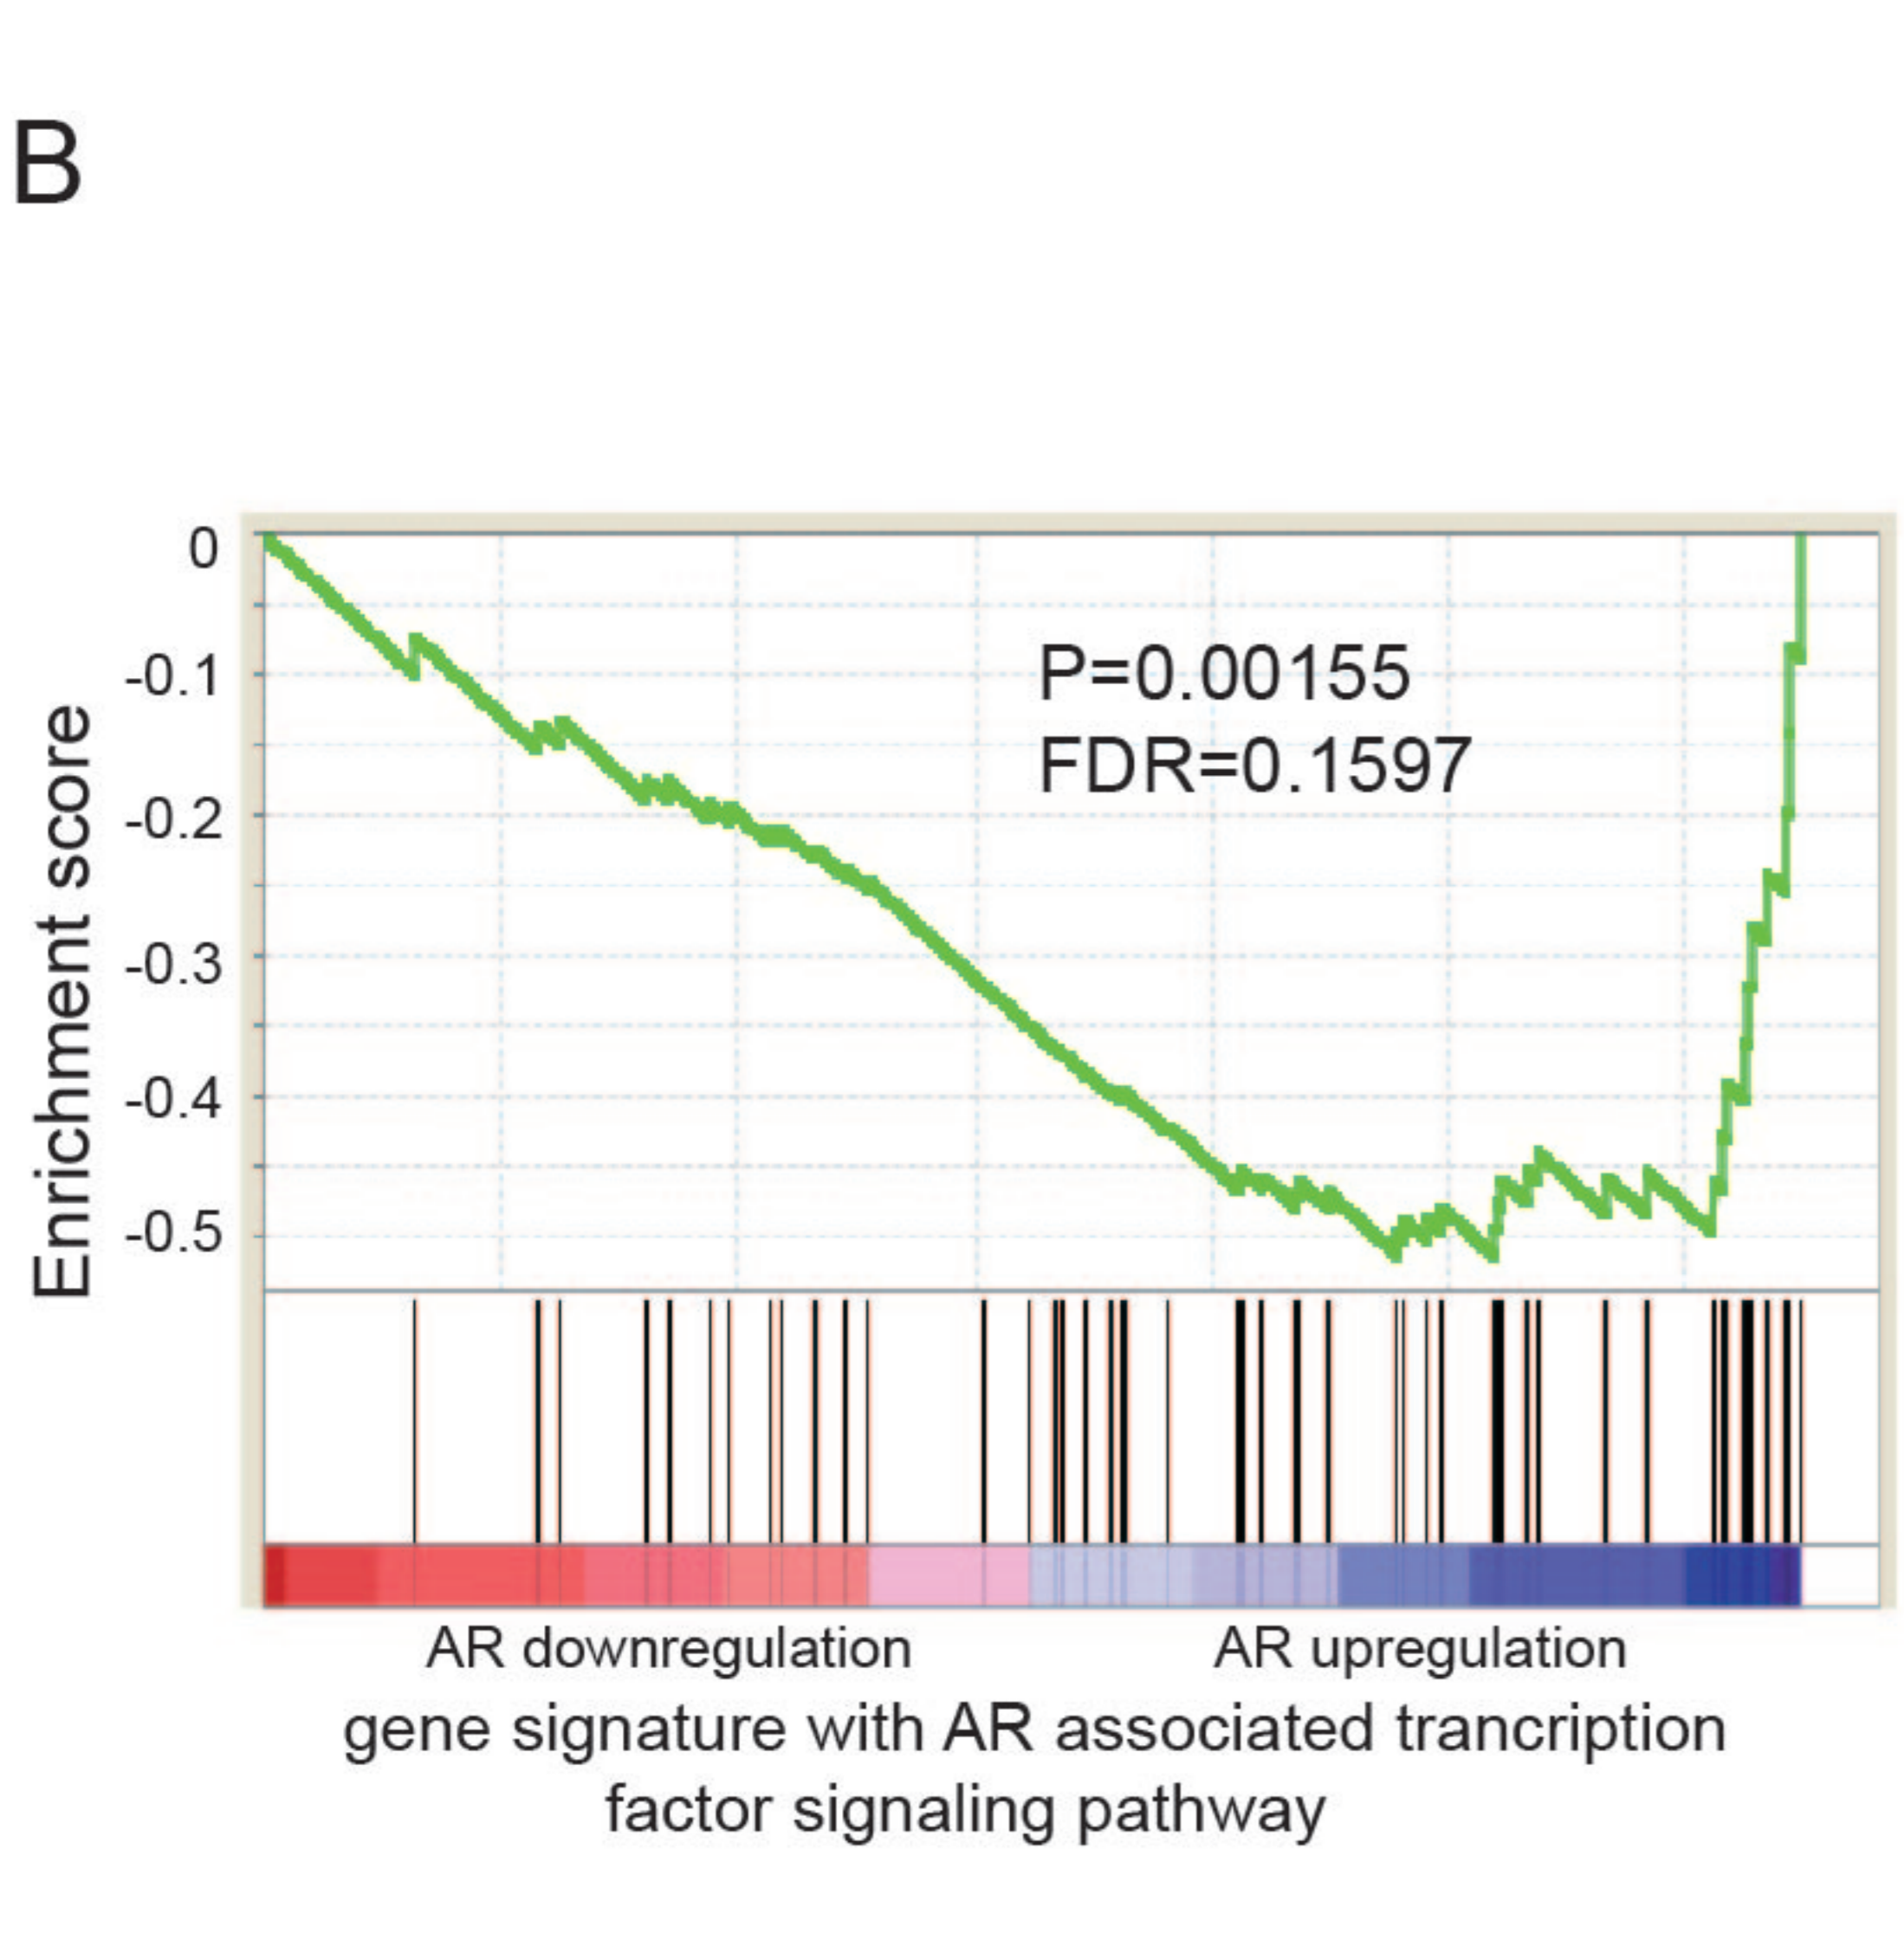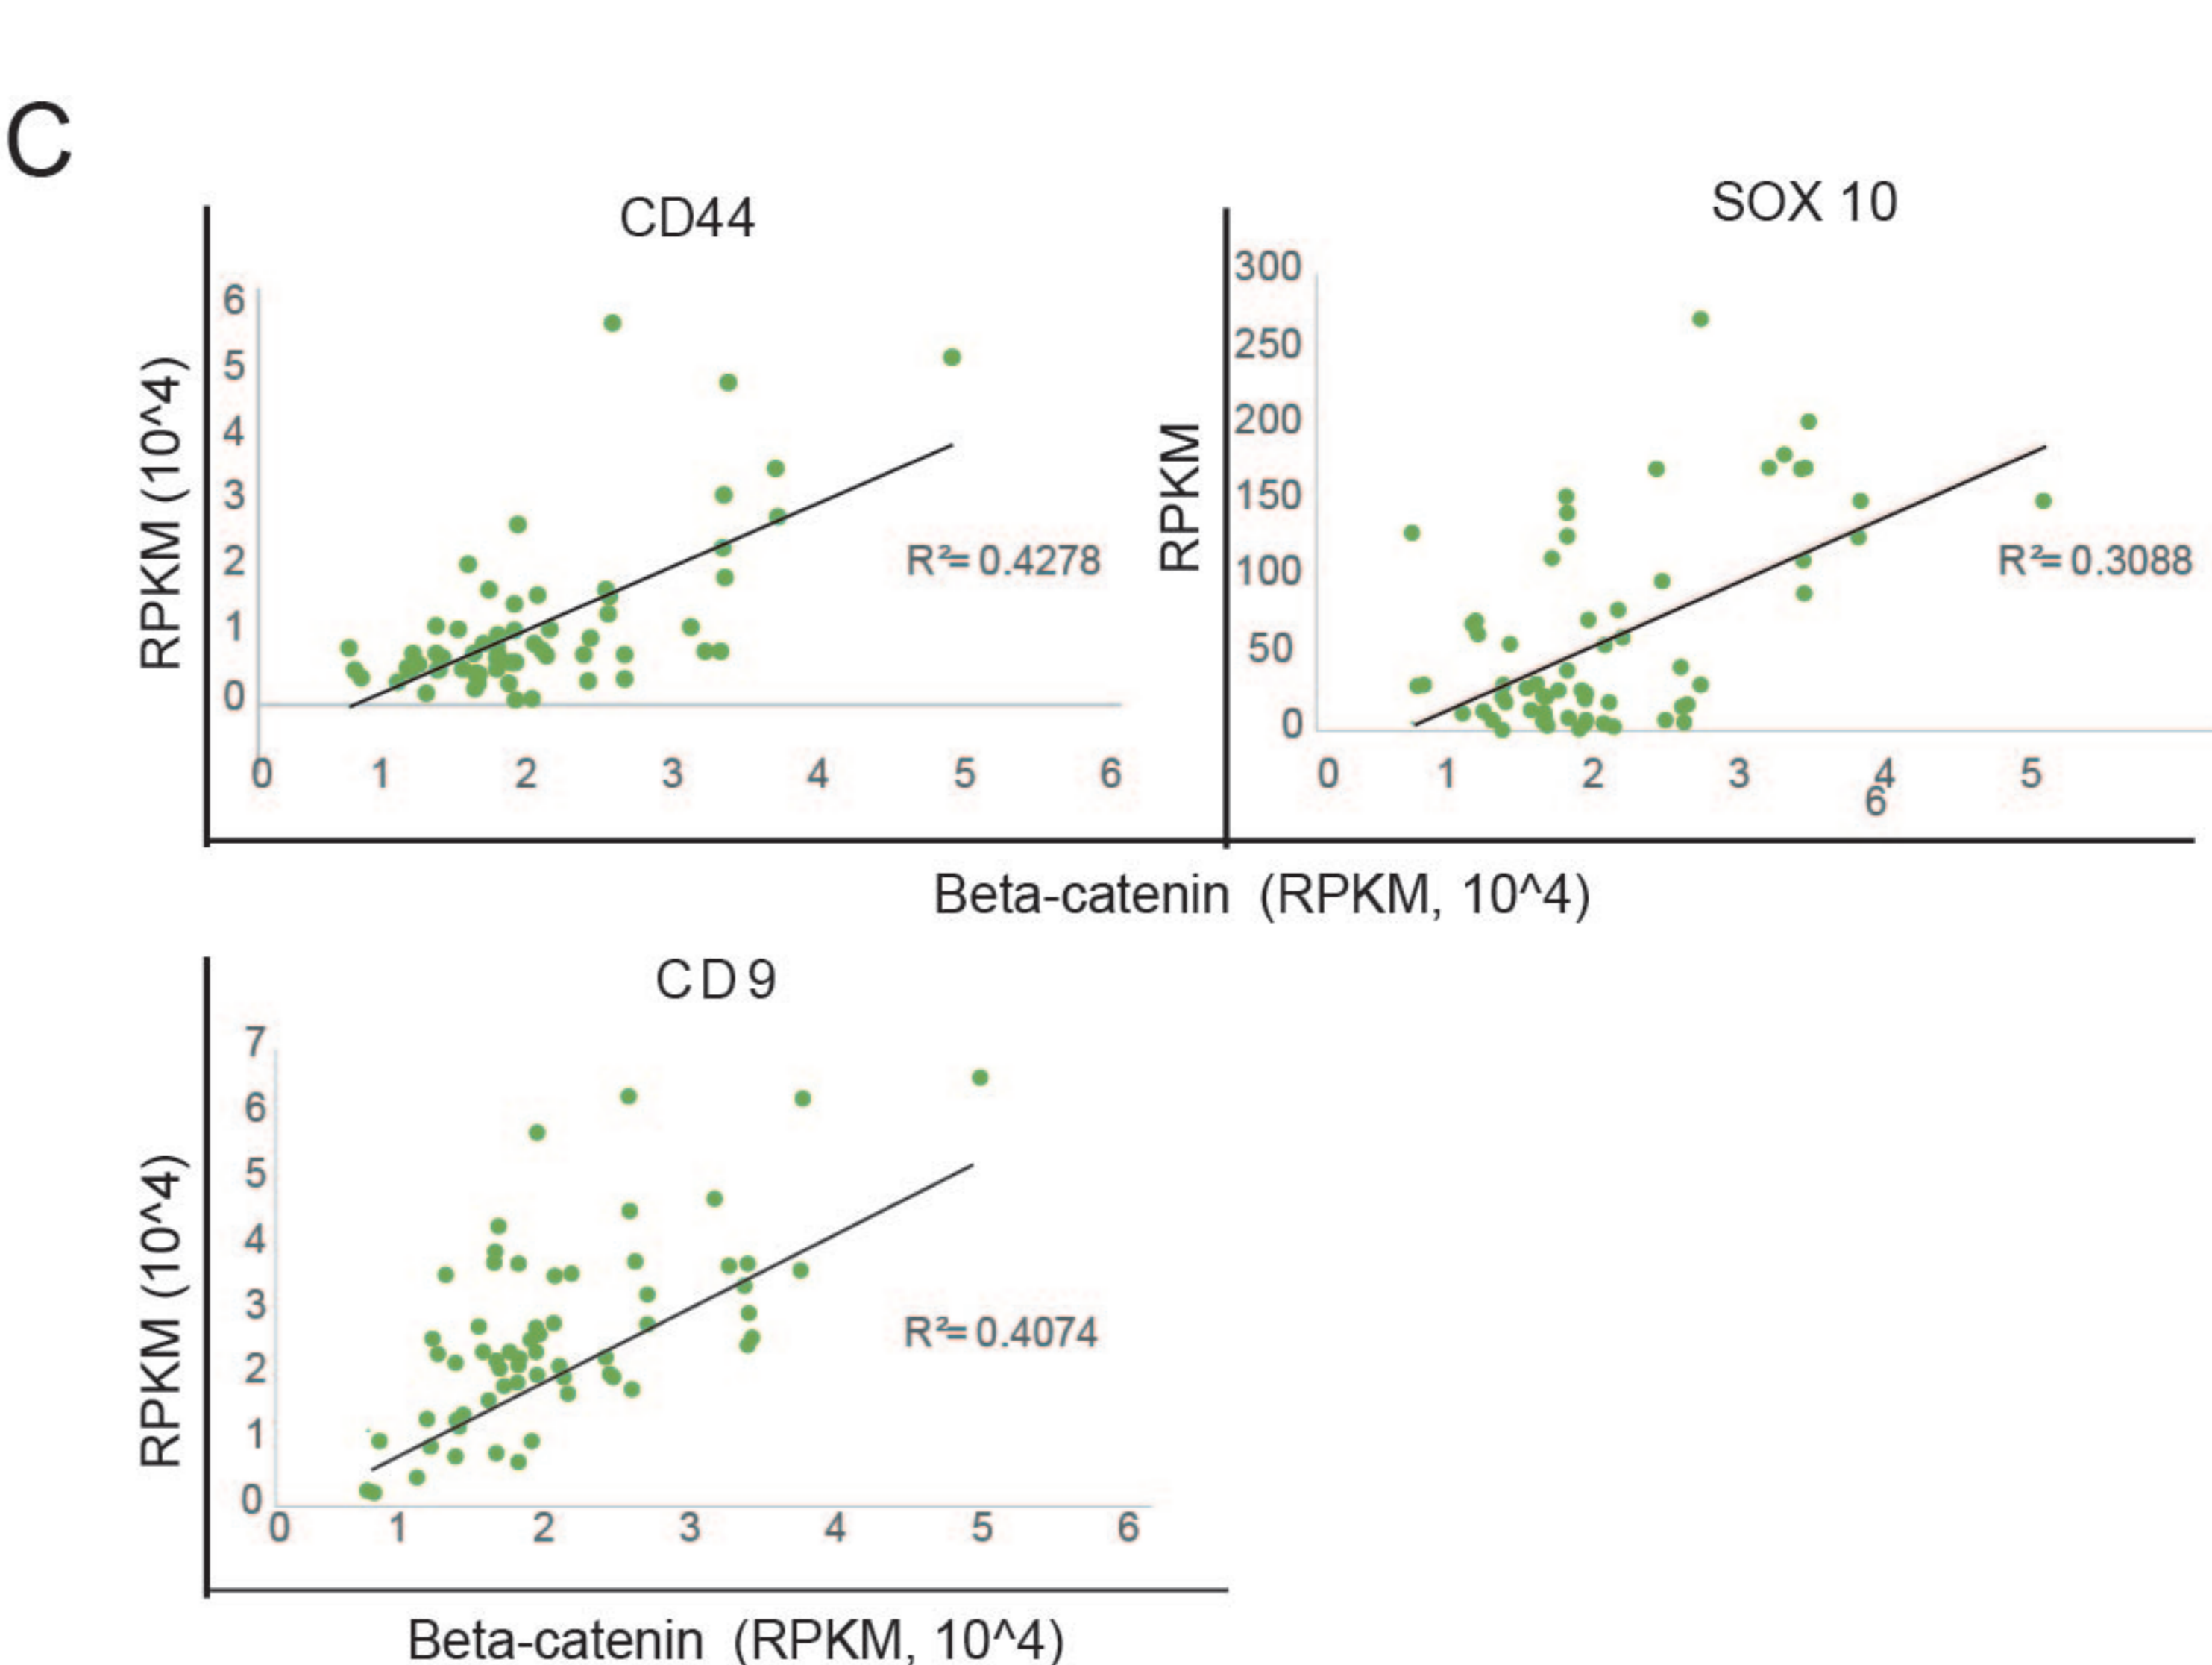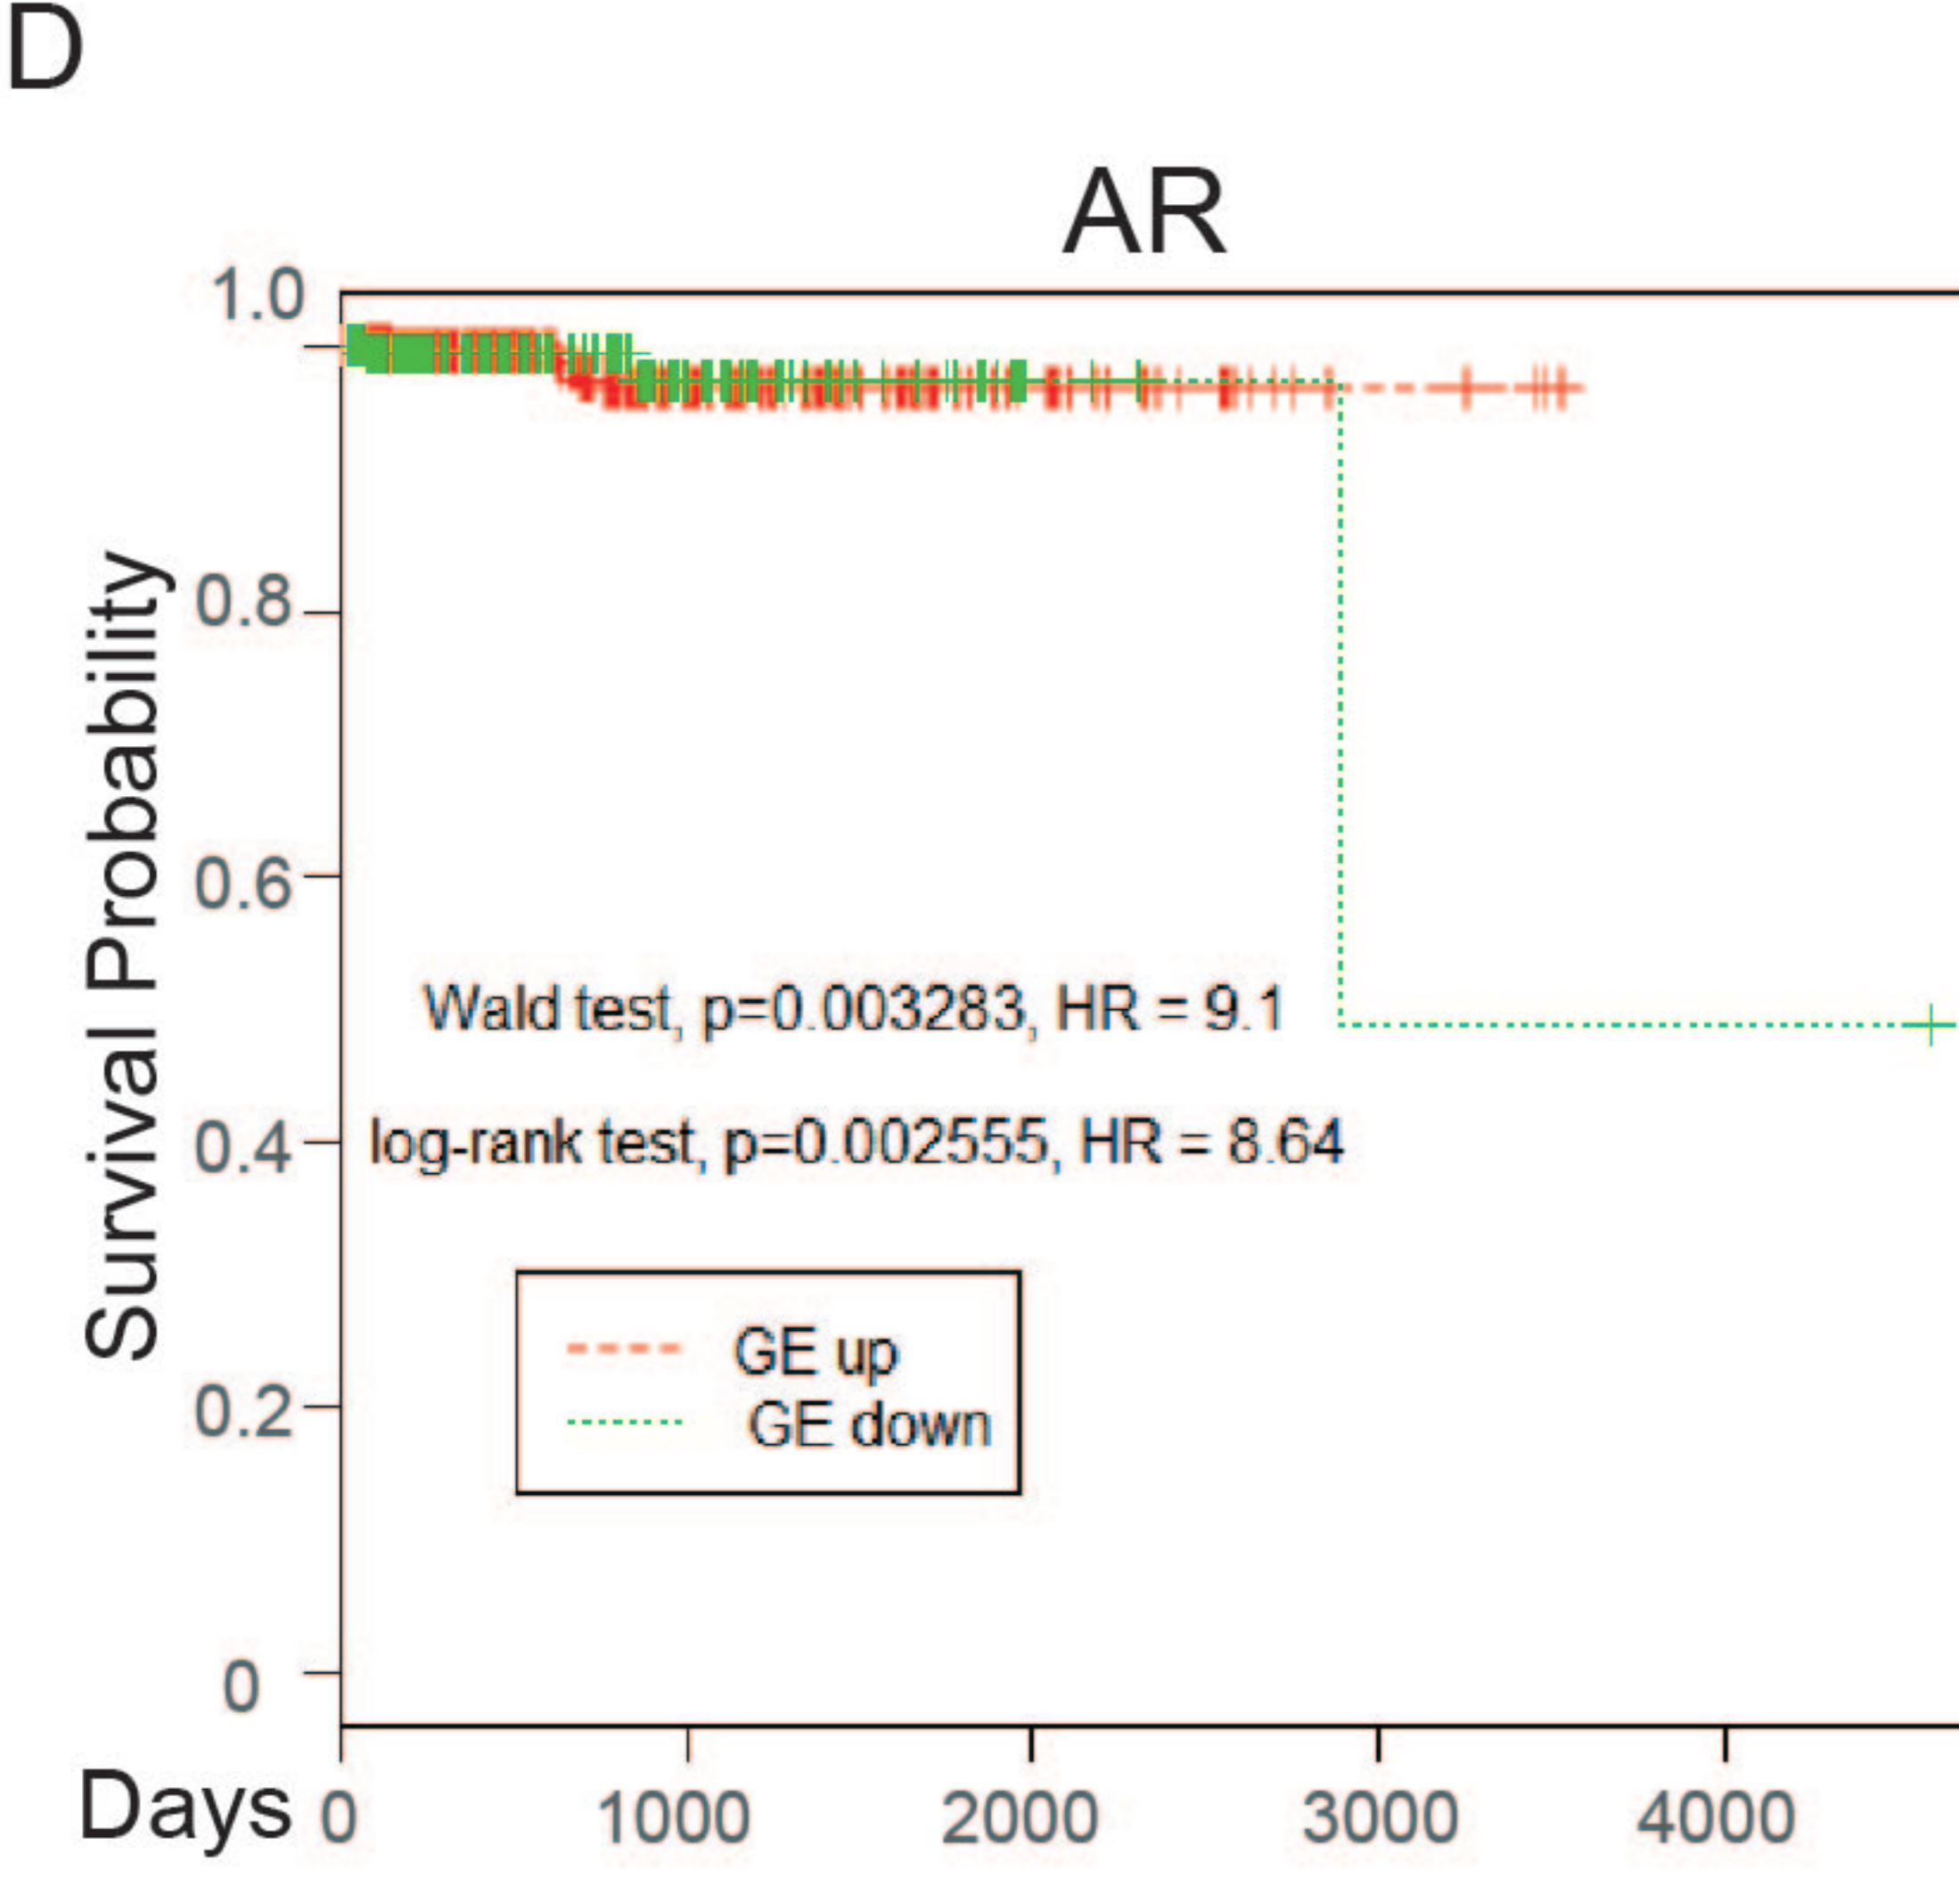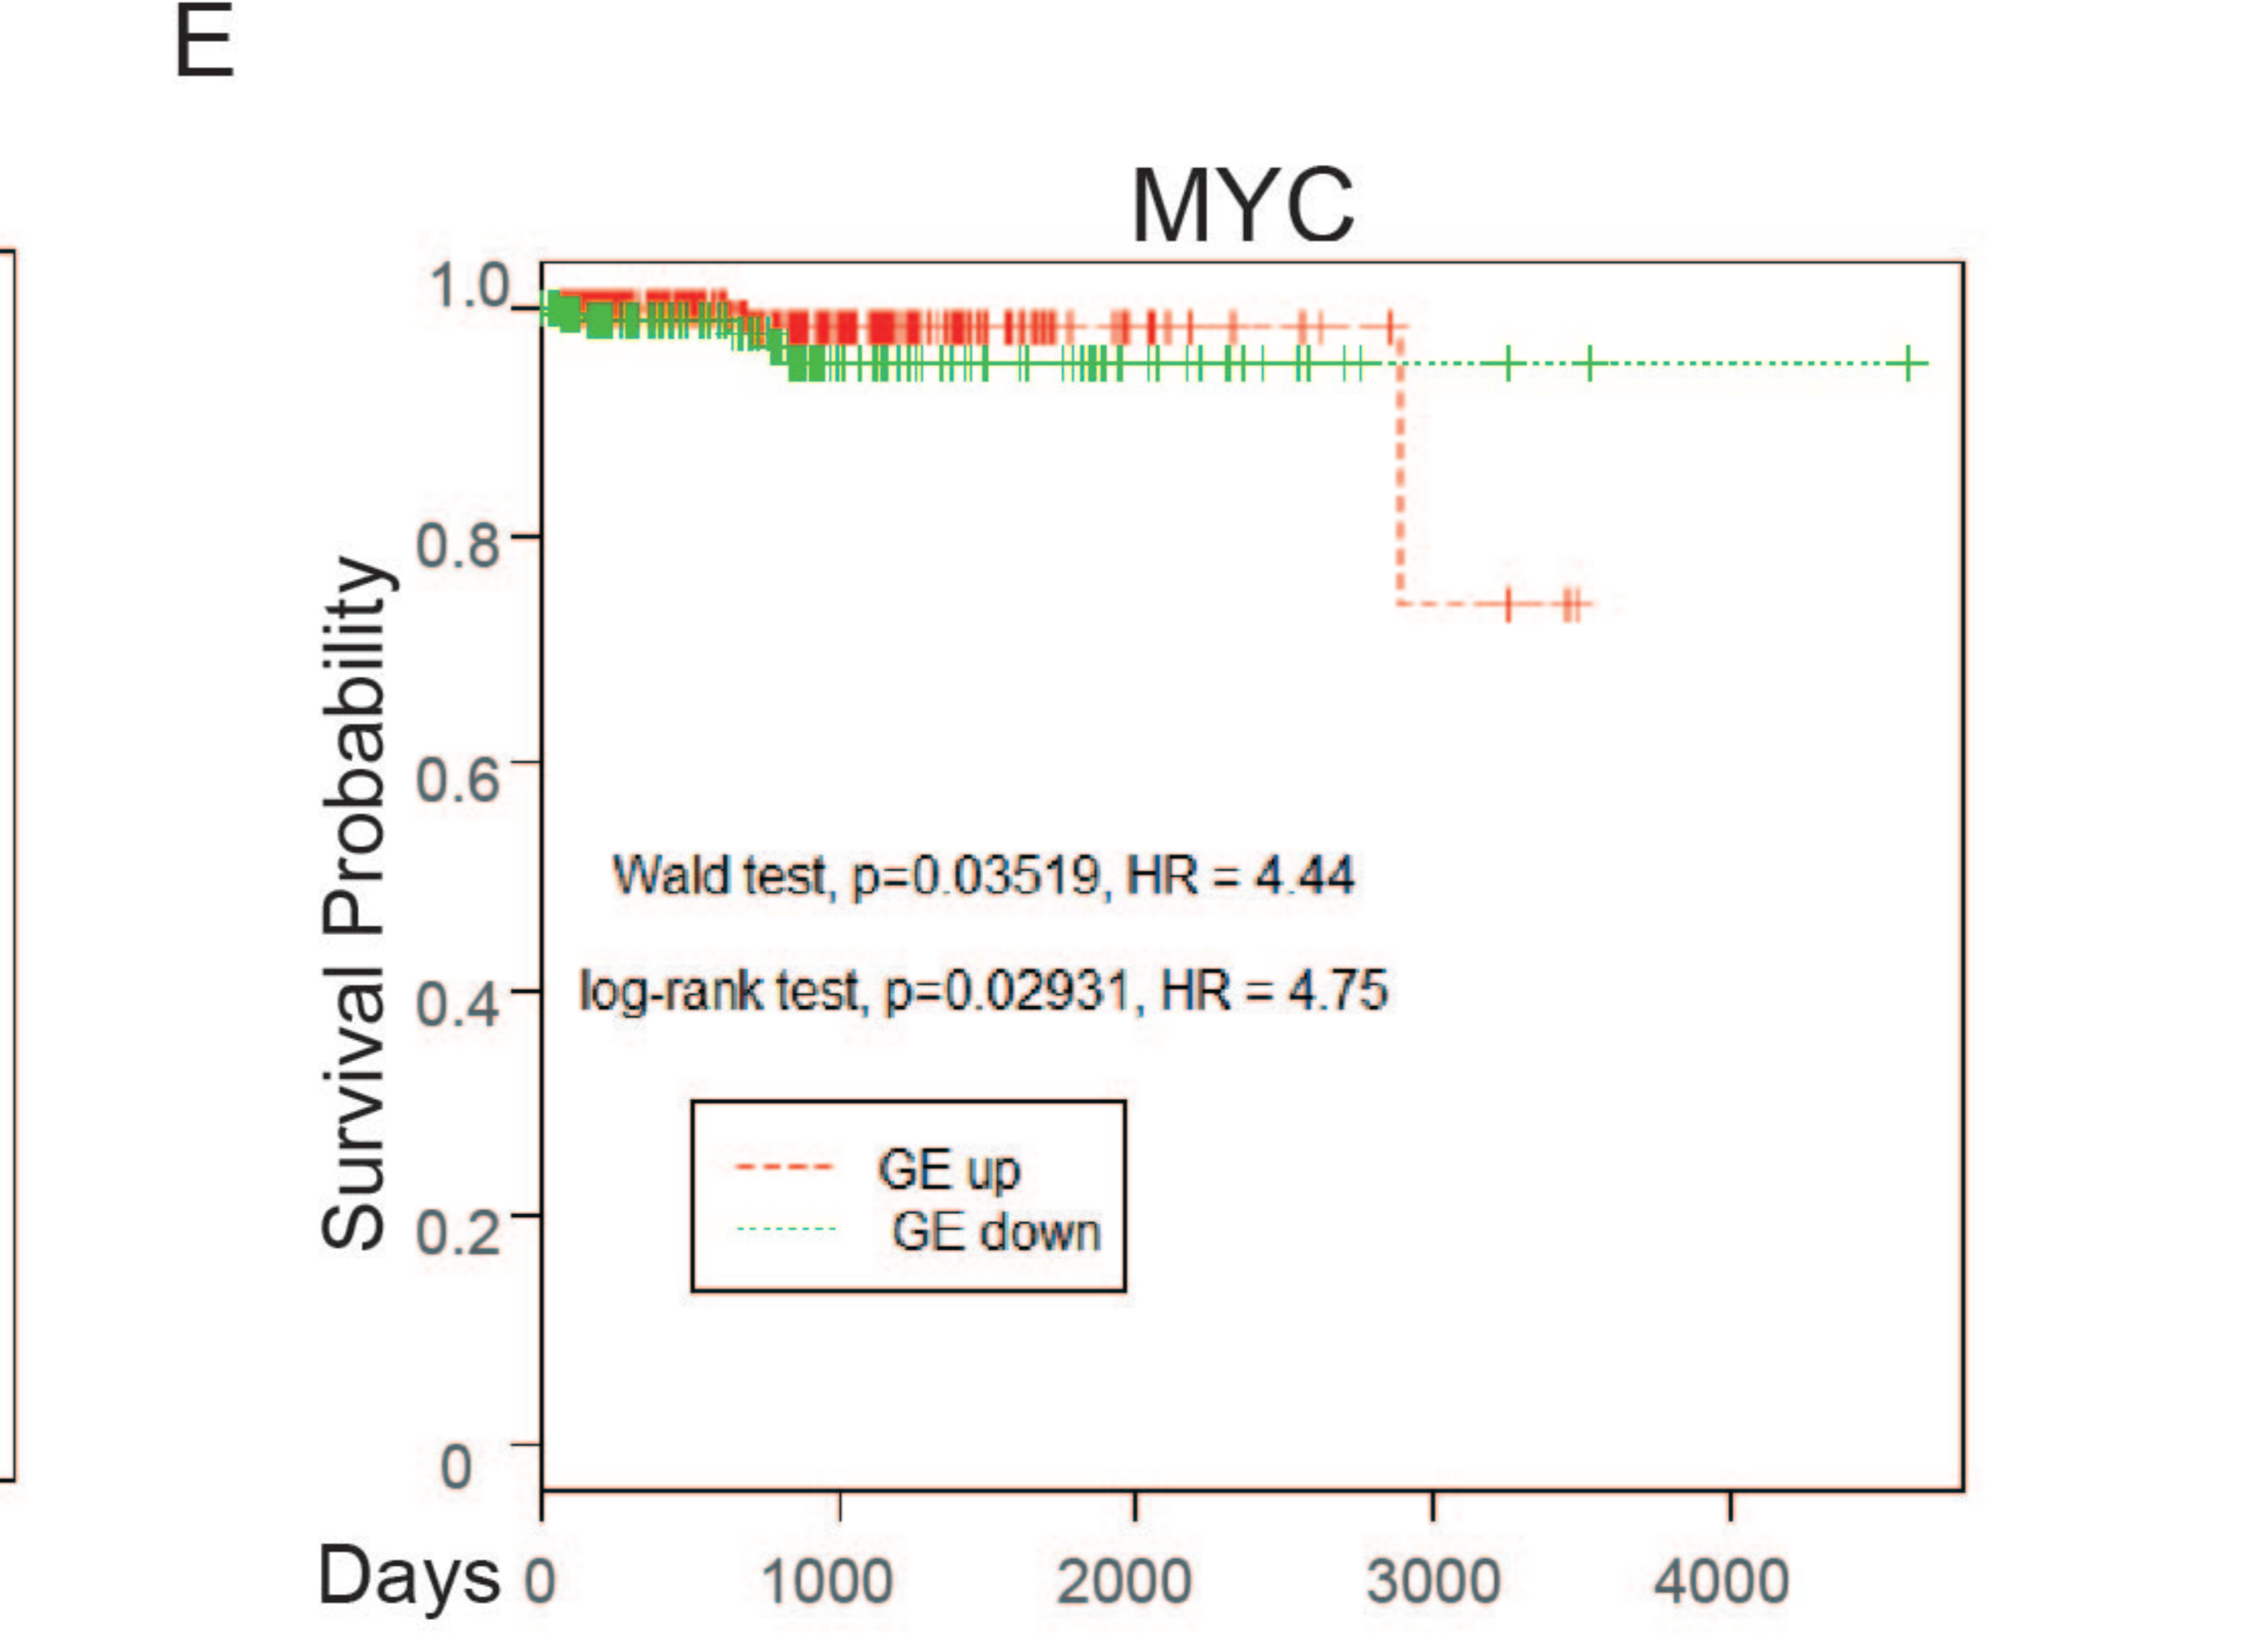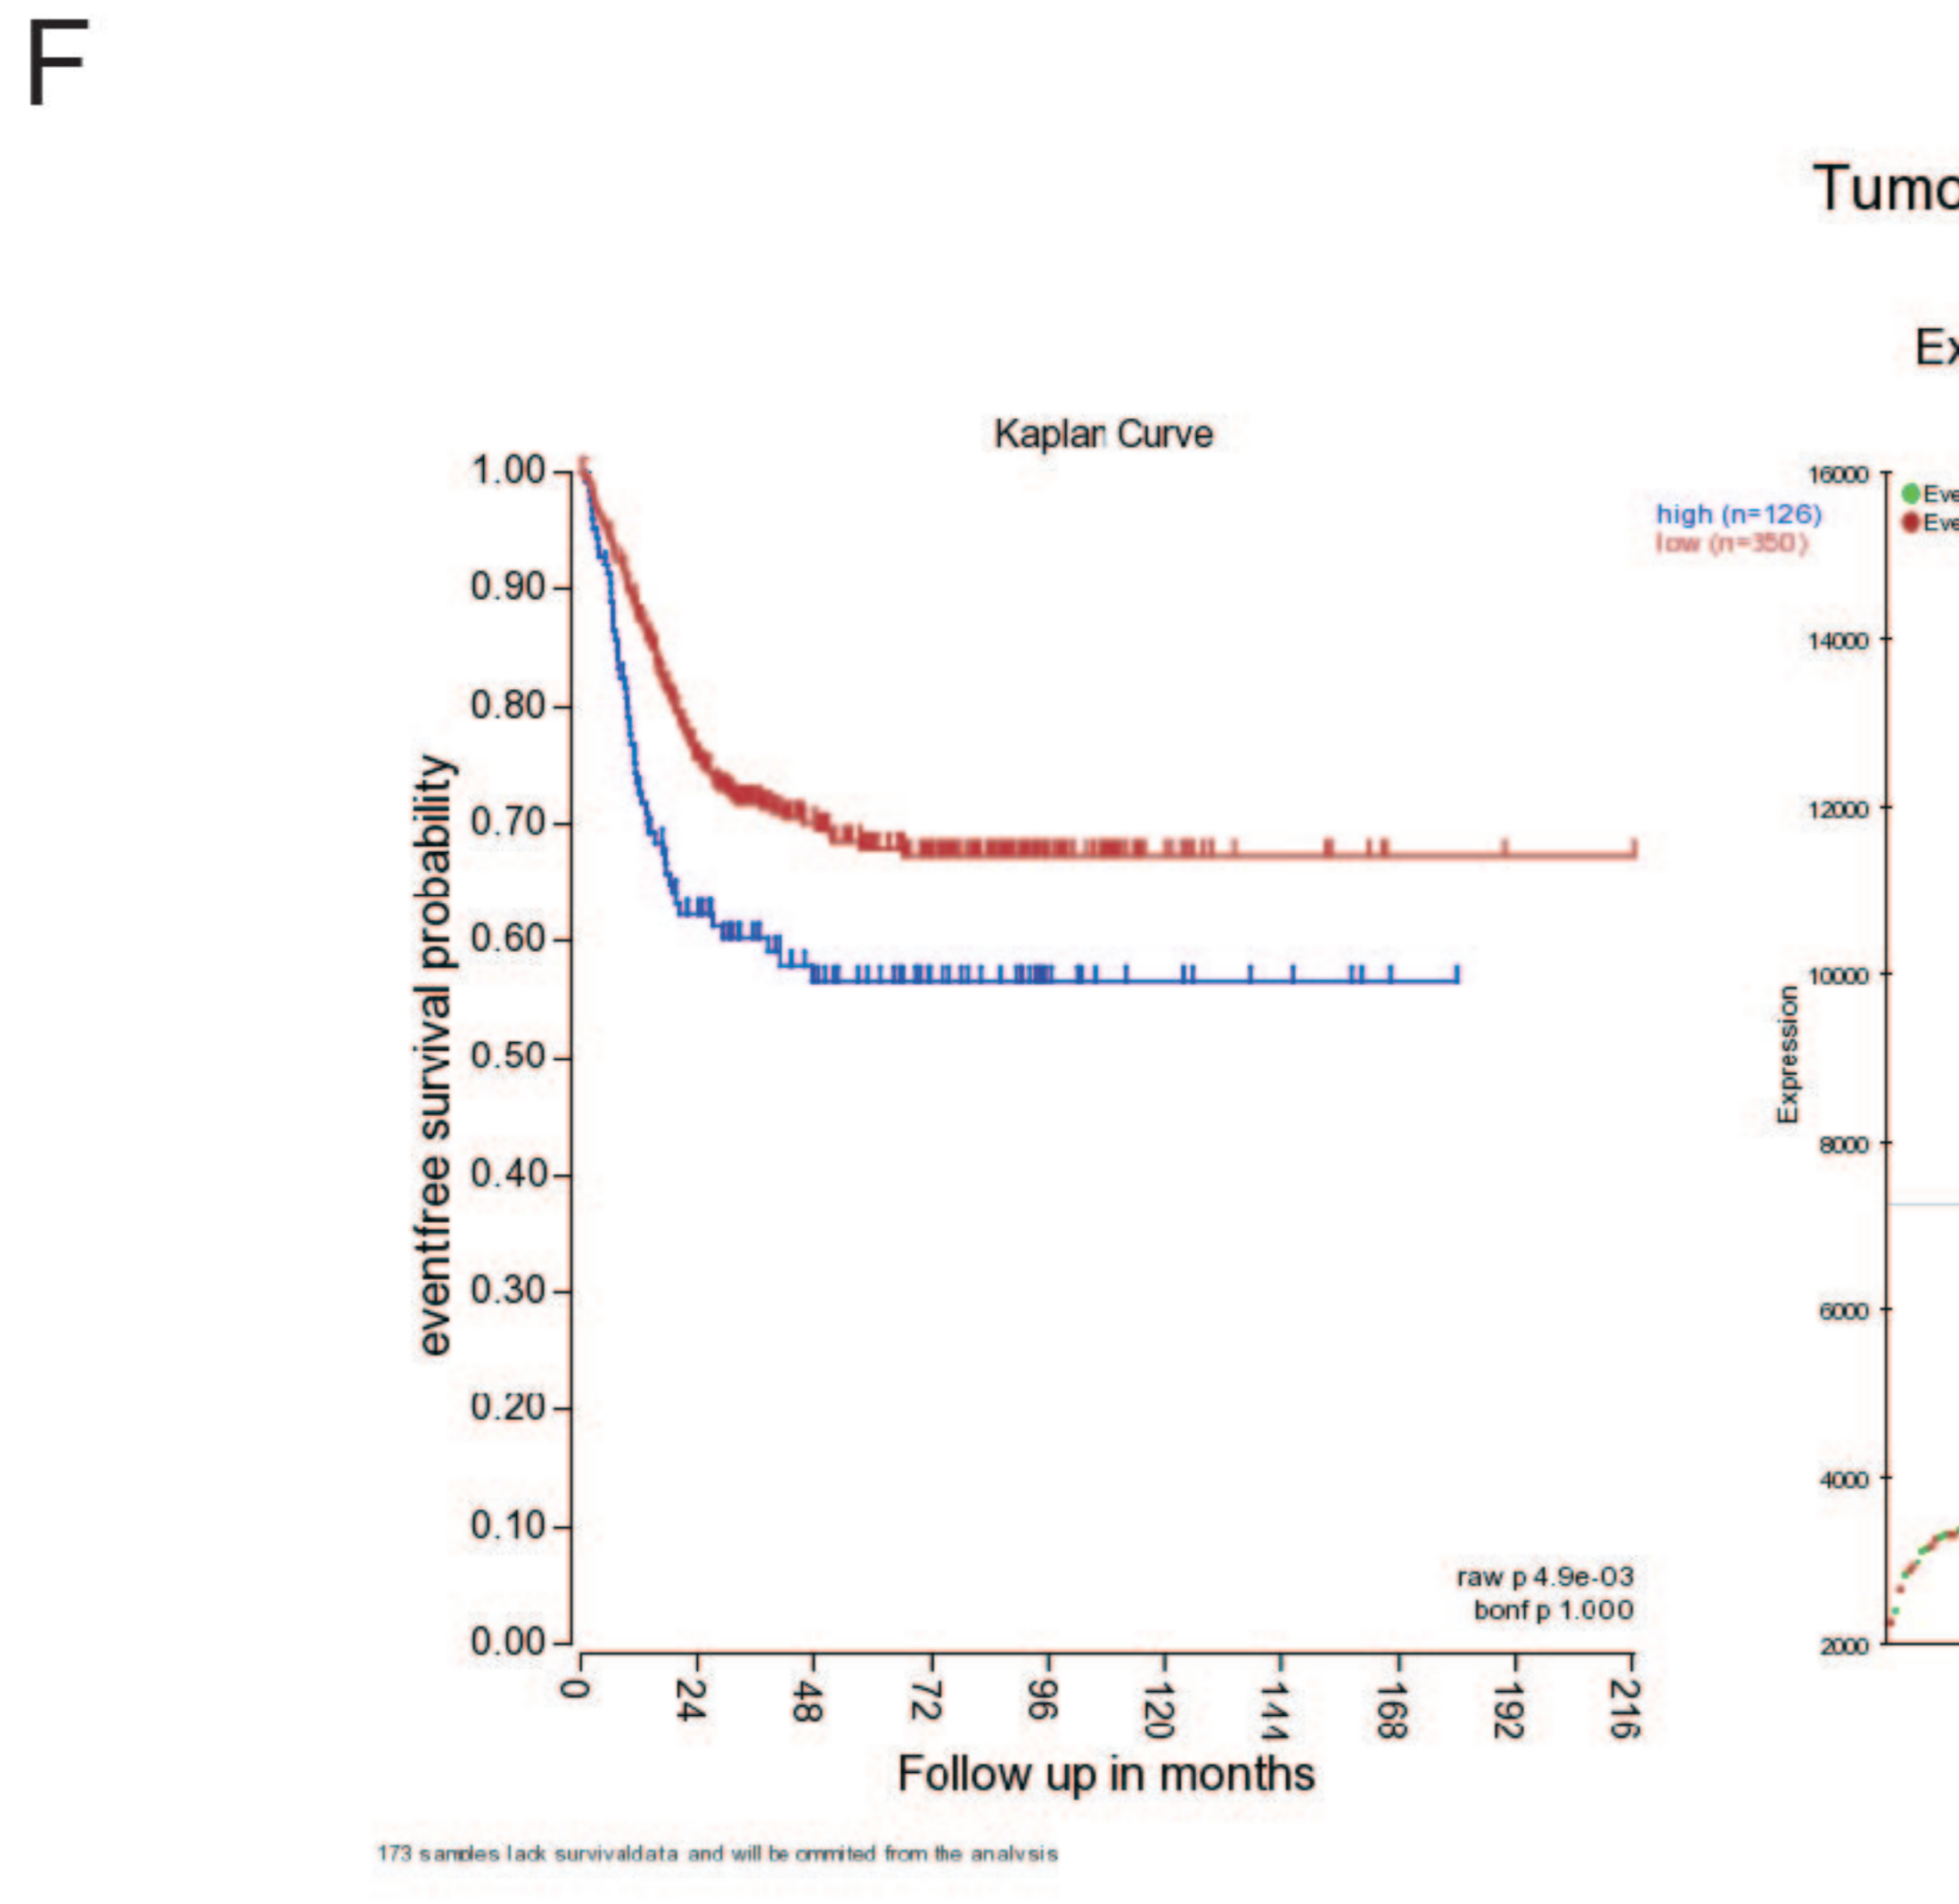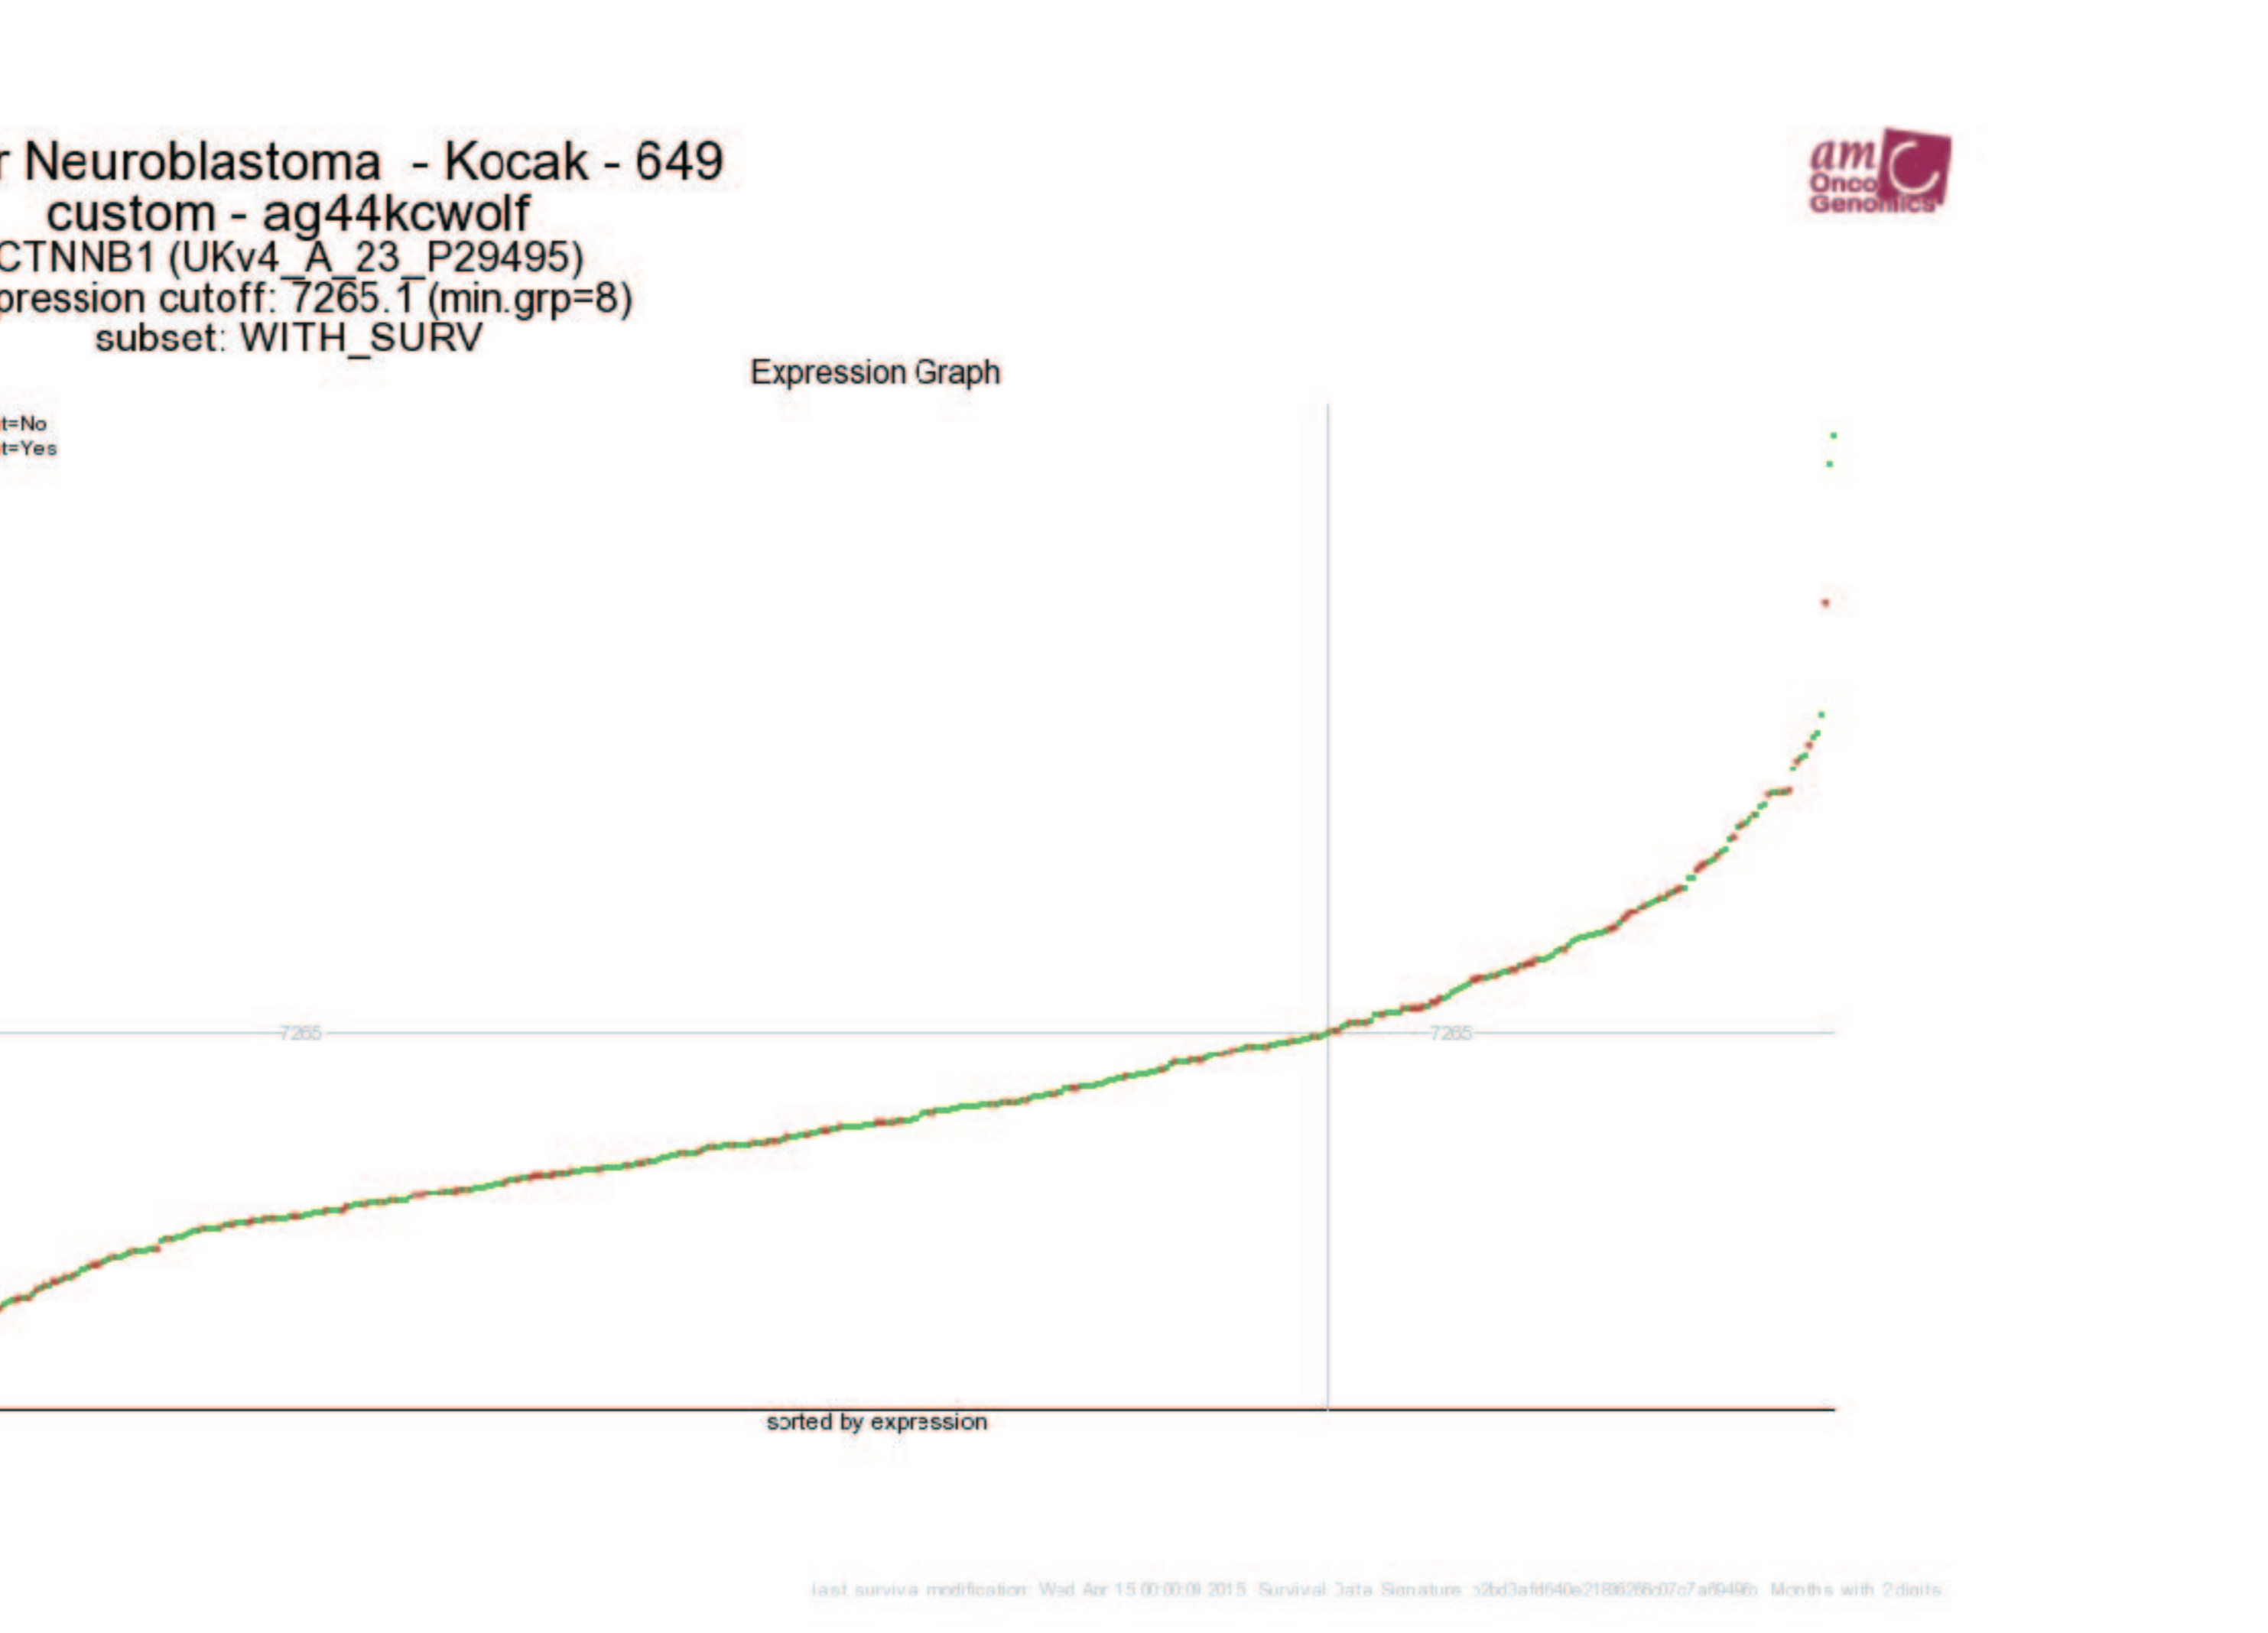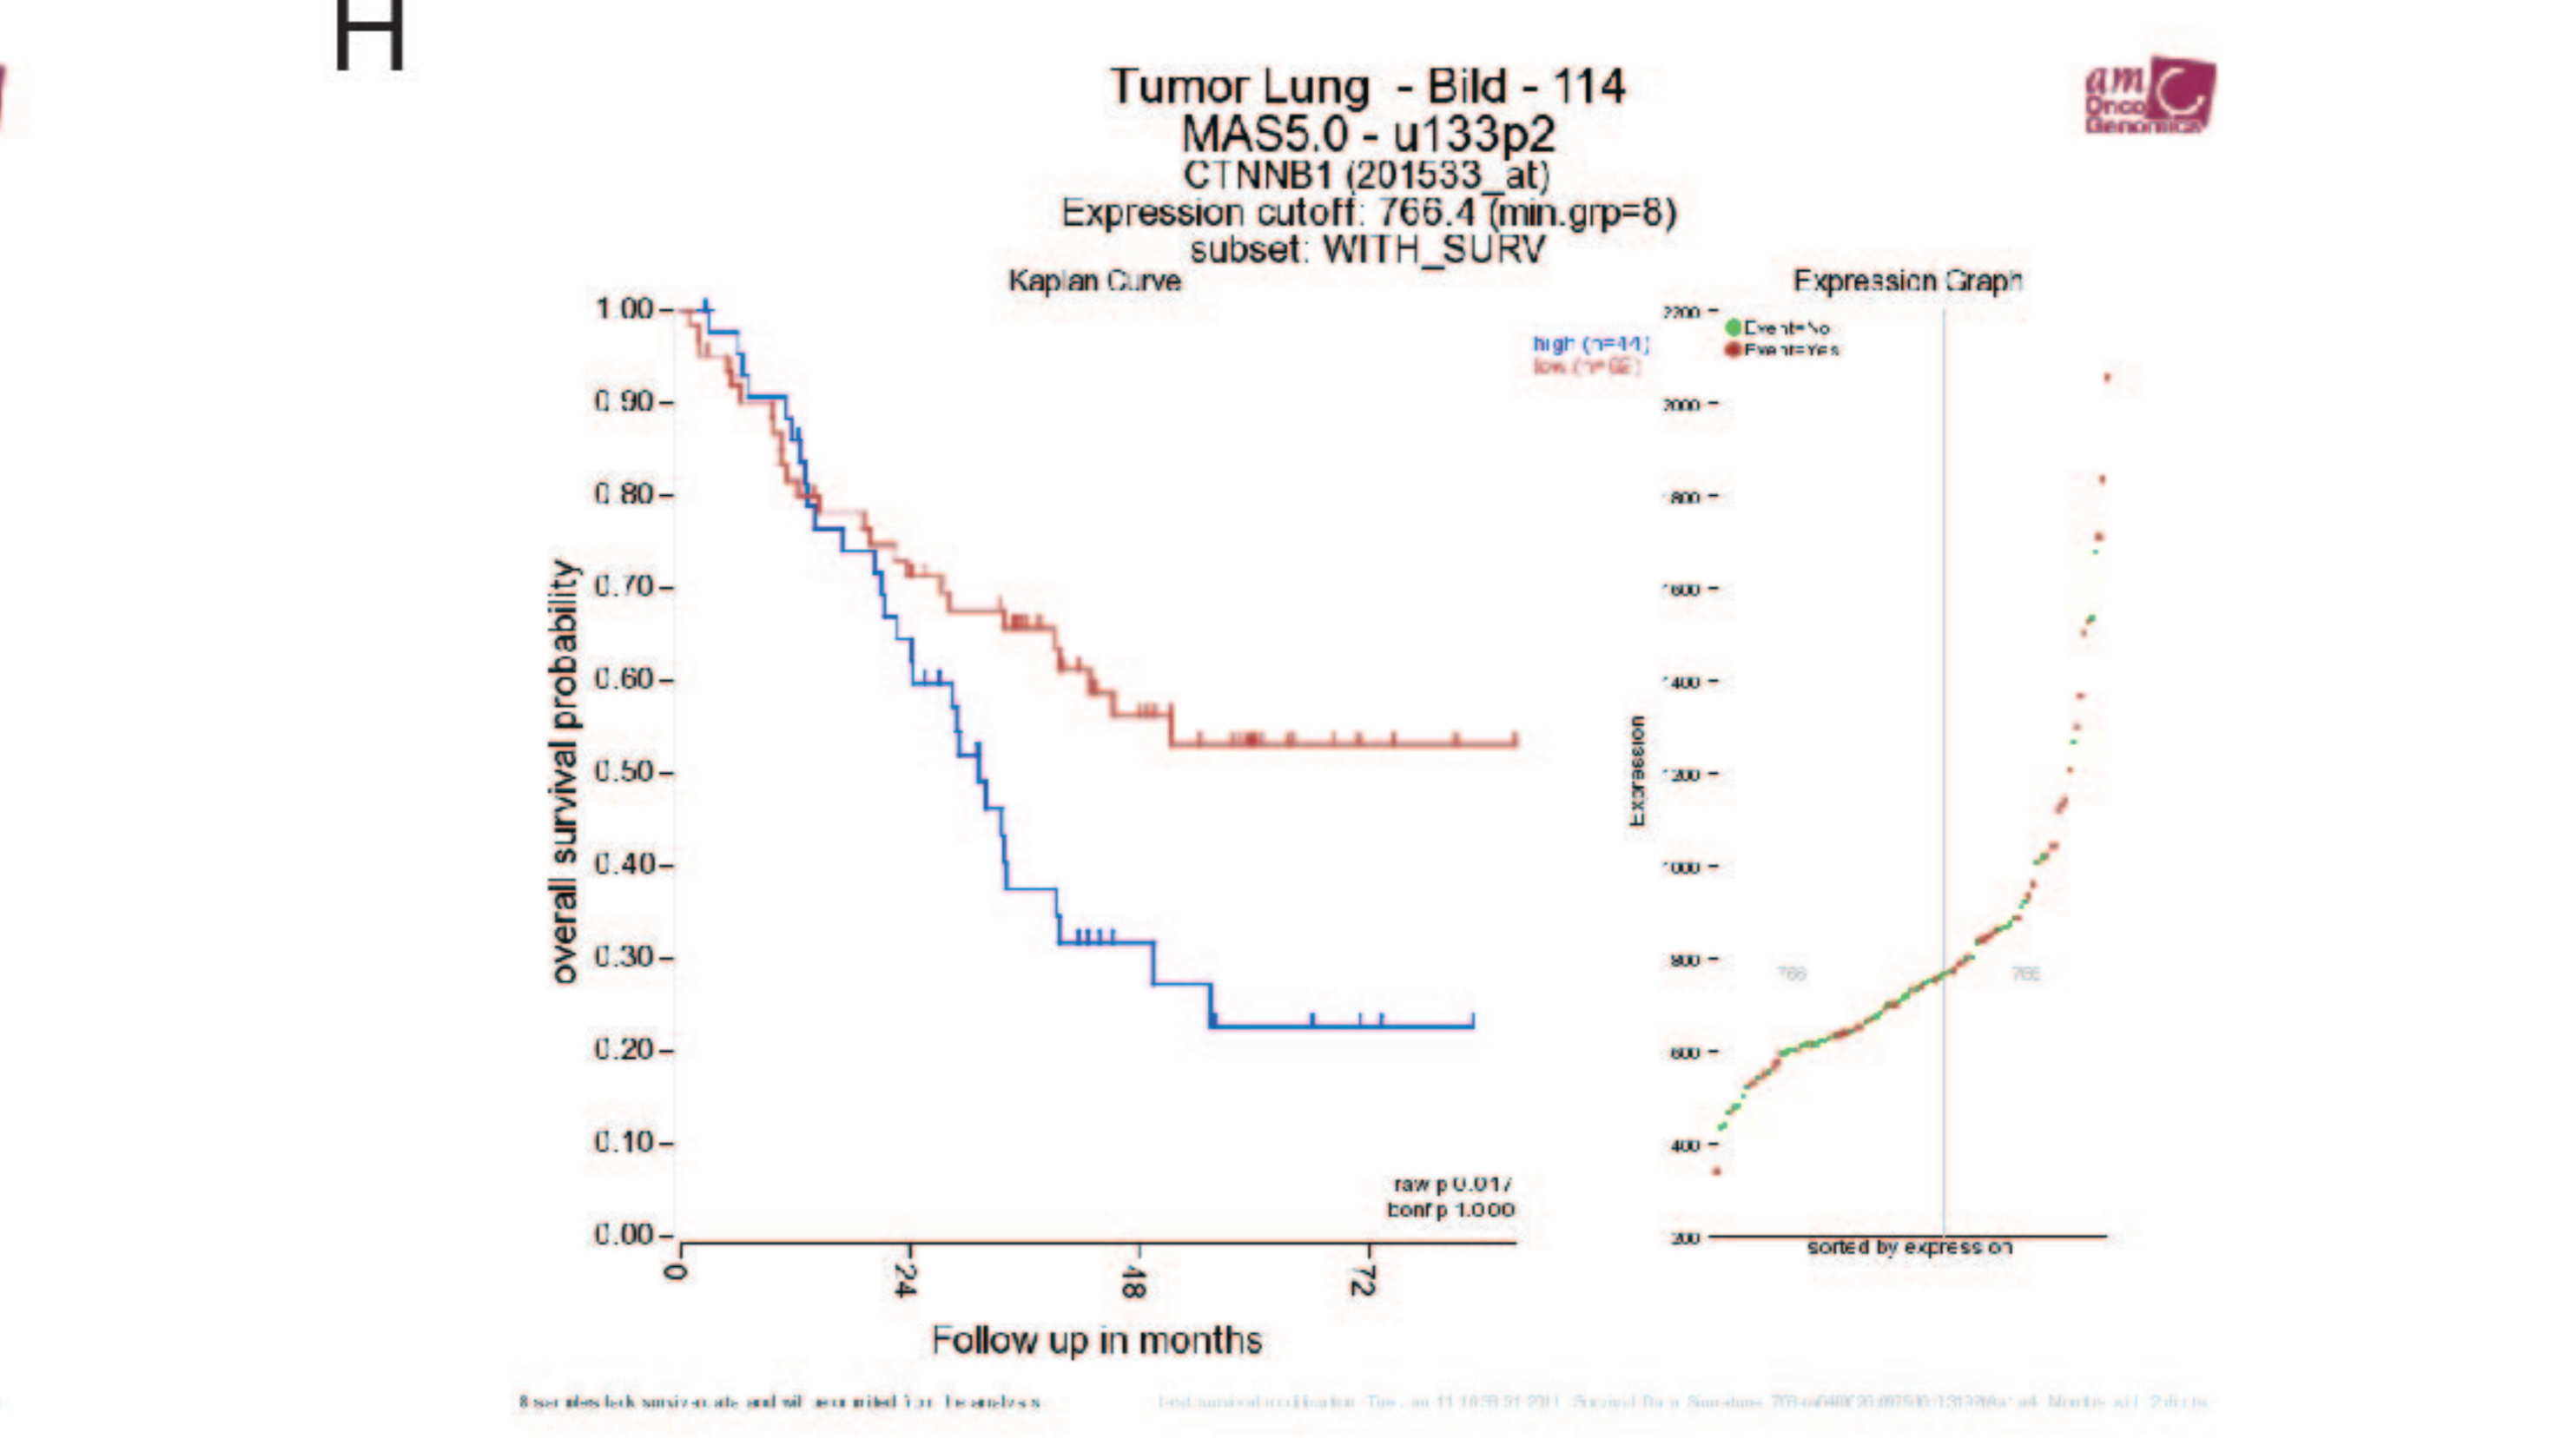

**I**

**Clinicopathological features of TCGA prostate cancer patients for study**

| Characteristics                | Total Cases N  | Tumor Adjacent Normal N(%) | Hormone Therapy N(%) | P-value |
|--------------------------------|----------------|----------------------------|----------------------|---------|
| <b>Characteristics</b>         |                |                            |                      |         |
| Male                           | 498            | 52 (10.44%)                | 70 (14.05%)          |         |
| Female                         | 0              | 0                          | 0                    |         |
| <b>Age (years)</b>             |                |                            |                      |         |
| Mean ± SD                      | 61.02±6.81     | 60.28±7.24                 | 61.36±5.34           |         |
| Range                          | 41-78          | 43-72                      | 51-75                |         |
| <b>Follow up days</b>          |                |                            |                      |         |
| Mean ± SD                      | 700.95±693.376 | 435.03±491.46              | 1255.58±662.01       |         |
| Range                          | 1-4604         | 1-1925                     | 62-3247              |         |
| <b>Gleason_score</b>           |                |                            |                      |         |
| Mean ± SD                      | 7.61±1.008     | 7.11±0.669                 | 8.73±0.623           |         |
| Range                          | 6-10           | 6-9                        | 7-10                 |         |
| <b>Distant Metastasis</b>      |                |                            |                      | 0.207   |
| M0 (No)                        | 455 (91.36%)   | 48 (92.30%)                | 64 (91.42%)          |         |
| M1 (Yes)                       | 4 (0.80%)      | 0                          | 2 (2.85%)            |         |
| <b>Lymph node metastasis</b>   |                |                            |                      | <<0.01  |
| N0                             | 345 (69.227%)  | 46 (88.46%)                | 33 (47.14%)          |         |
| N1                             | 79 (15.86%)    | 1 (1.92%)                  | 33 (47.14%)          |         |
| <b>Depth of tumor invasion</b> |                |                            |                      | <<0.01  |
| T1+T2                          | 187 (35.55%)   | 29 (55.76%)                | 2 (2.85%)            |         |
| T3+T4                          | 303 (60.84%)   | 23 (44.23%)                | 31 (44.28%)          |         |

Abbreviations: SD, standard deviation; N, number; P-values were calculated by Pearson's chi-squared test.

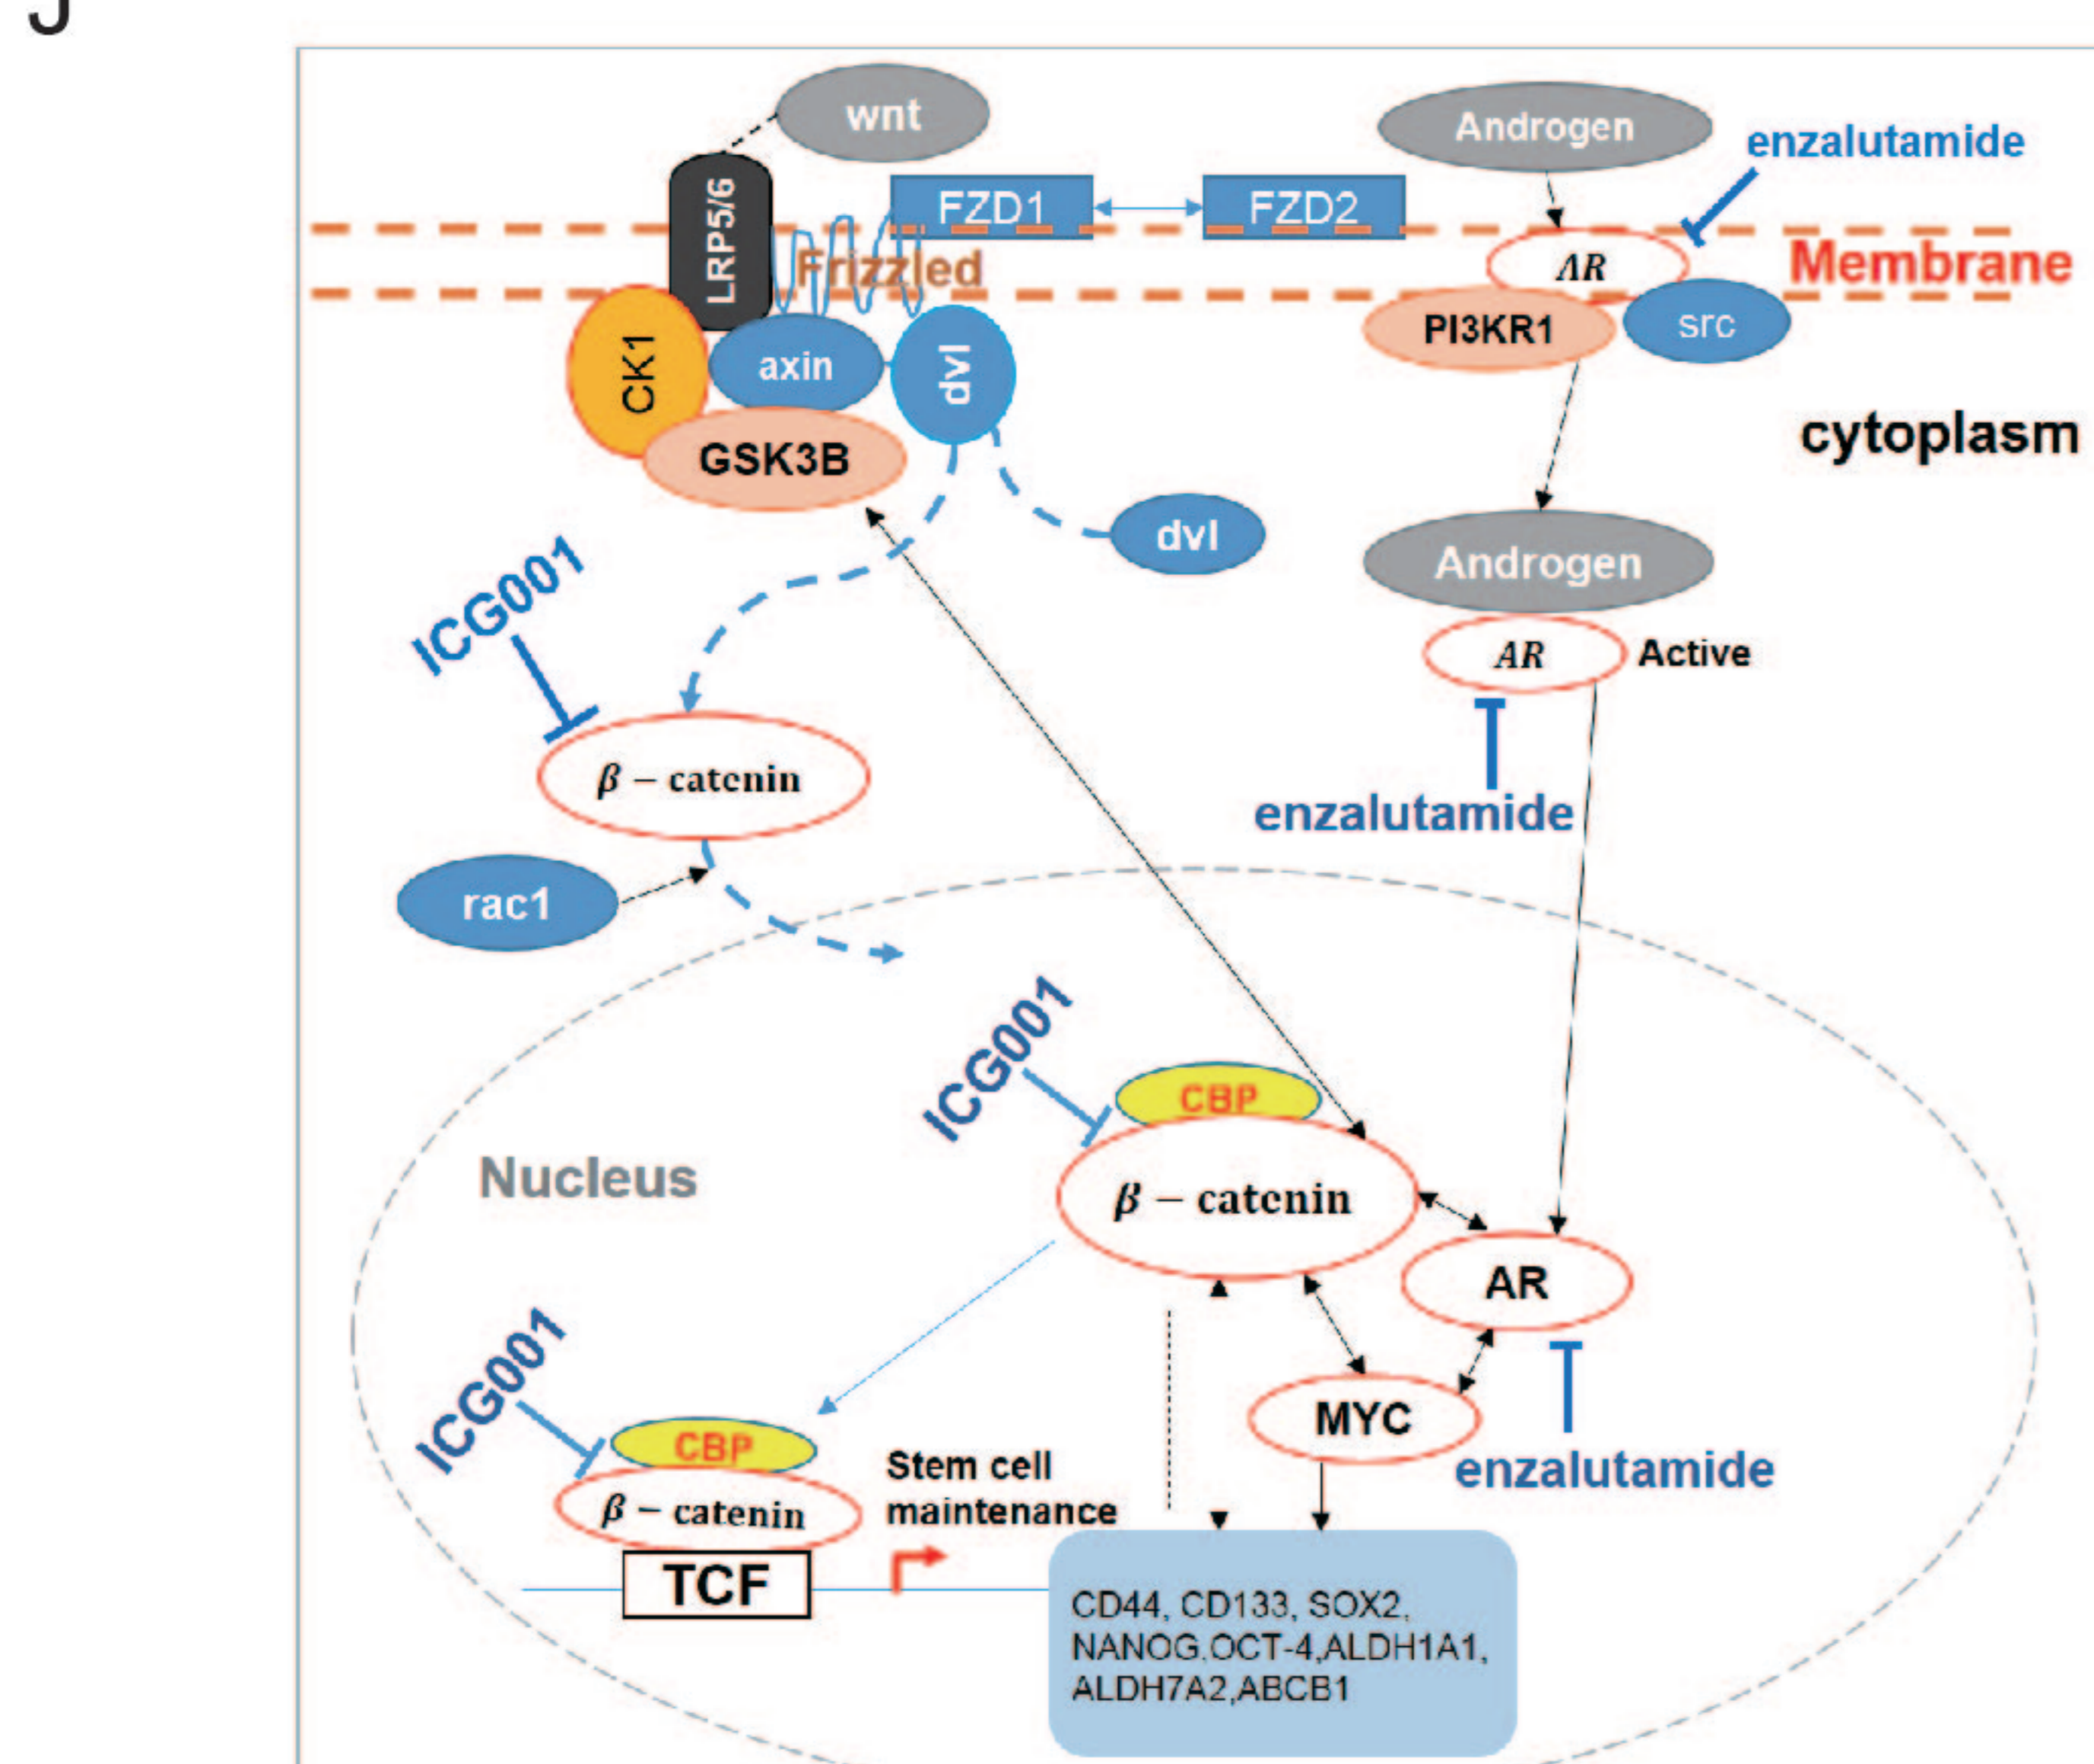

**Supplementary Figure legends:**

**Figure S1.** Analysis of correlation between AR and  $\beta$ -catenin in PCa.

**Figure S2.** The Wnt/ $\beta$ -catenin pathway is activated in cell lines and human specimens.

**Figure S3.** Treatment with ICG001 overcomes enzalutamide resistance in PCa.

**Figure S4.** Activation of the Wnt/ $\beta$ -catenin pathway contributes to enzalutamide resistance.

**Figure S5.** Different gene signature in human PCa specimens and correlation between  $\beta$ -catenin and survival probability.
